# Supplementary material for: Cation–cation and anion–anion complexes stabilized by halogen bonds
Source: Royal Society of Chemistry journal article supplement (doi:10.1039/c6cp03662g), 2016-01-01
Supplement: c6cp03662g1.pdf [file c6cp03662g1.pdf]

Supplementary Information for:

# Cation-Cation and Anion-Anion Complexes Stabilized by Halogen Bonds

David Quiñonero\*

Departament de Química, Universitat de les Illes Balears, Crta. de Valldemossa km 7.5, 07122 Palma de Mallorca, Spain.

Ibon Alkorta\*, Jose Elguero

Instituto de Química Médica (CSIC), Juan de la Cierva, 3, 28006 Madrid, Spain.

## Contents of Supplementary Information:

**Table S1.** Molecular graph and geometry of the complexes calculated at M06-2x/aug-cc-pVTZ computational level.

**Table S2.** Difference between the binding energy of hydrogen-bonded (HB) and halogen-bonded cation-cation complexes ( $E_{\text{rel}}$  in  $\text{kJ}\cdot\text{mol}^{-1}$ ). Negative values indicate that HB is more stable than halogen-bonded systems.

**Table S3.** Basis set superposition error (BSSE in  $\text{kJ}\cdot\text{mol}^{-1}$ ) for selected ion-ion complexes and their corresponding transition states (TS).

**Table S4.** Relative binding energies of complexes **1** $[\text{NH}_3^+, \text{N}]:\text{XNH}_3^+$  and **4** $[\text{CO}_2^-, \text{NI}]:\text{Y}^-$  with three explicit water molecules. Complex A shows halogen bond and complex B shows a water molecule linking the two charged systems.

**Table S5.** Electron density ( $\rho_{\text{BCP}}$ ), Laplacian ( $\nabla^2\rho_{\text{BCP}}$ ) and total electron density energy ( $H_{\text{BCP}}$ ), in a.u., for the intermolecular bond critical point in all complexes in gas phase.

**Table S6.** DF-DFT-symmetry-adapted perturbation theory (SAPT) electrostatic, exchange, induction, and Hartree-Fock higher-order energy contributions ( $E_{\text{el}}$ ,  $E_{\text{exch}}$ ,  $E_{\text{i}}$ , and  $\delta\text{HF}$ , respectively) of ion-ion complexes. Energies in  $\text{kJ}\cdot\text{mol}^{-1}$ .

**Table S7.** CSD reference codes, contact distances (in Å) and type of intermolecular contact.

**Figure S1.** Energy (kJ/mol) dissociation profile with BSSE and without BSSE correction of **1** $[\text{NH}_3(+), \text{N}]:\text{ClNH}_3(+)$  vs. the  $\text{N}\cdots\text{Cl}$  distance (Å) (top) and Energy (kJ/mol) dissociation profile of **1** $[\text{CO}_2(-), \text{Cl}]:\text{F}(-)$  vs. the  $\text{I}\cdots\text{F}(-)$  distance (Å) (bottom).

**Figure S2.** Binding energy along the dissociation path.  $E_{\text{b}}$  in  $\text{kJ}\cdot\text{mol}^{-1}$  and distances in Å.

**Figure S3.** Corrected binding energy along the dissociation path.  $E_{\text{corr}}$  in  $\text{kJ}\cdot\text{mol}^{-1}$  and distances in Å.

**Figure S4.** Representation of the binding energy in water ( $E_{\text{H}_2\text{O}}$ ,  $\text{kJ}\cdot\text{mol}^{-1}$ ) versus the binding energy in gas phase ( $E_{\text{b}}$ ,  $\text{kJ}\cdot\text{mol}^{-1}$ ) for cation-cation complexes.

**Figure S5.** Binding energy along the dissociation path of  $\mathbf{3}[\text{CO}_2^-, \text{C-Br}]:\text{F}^-$  in water.  $E_{\text{H}_2\text{O}}$  in  $\text{kJ}\cdot\text{mol}^{-1}$  and distances in  $\text{\AA}$ .

**Figure S6.** Schematic representation of the explicit solvent complexes under study.

**Figure S7.** Exponential relationship between  $\text{X}\cdots\text{Y}^-$  intermolecular distance and the electron density and laplacian at the BCP ( $\rho$  and  $\nabla^2\rho$ , respectively, in a.u.) for the anion-anion complexes in gas phase.

**Figure S8.** Exponential relationship between  $\text{X}\cdots\text{Y}^-$  intermolecular distance and the electron density and laplacian at the BCP ( $\rho$  and  $\nabla^2\rho$ , respectively, in a.u.) for the anion-anion complexes in water.

**Figure S9.** Corrected binding energy ( $E_{\text{corr}}$ ,  $\text{kJ}\cdot\text{mol}^{-1}$ ) vs the electrostatic contribution ( $E_{\text{el}}$ ,  $\text{kJ}\cdot\text{mol}^{-1}$ ) for anion-anion complexes in gas phase.

**Figure S10.** Corrected binding energy ( $E_{\text{corr}}$ ,  $\text{kJ}\cdot\text{mol}^{-1}$ ) vs the induction contribution ( $E_{\text{i}}+\delta\text{HF}$ ,  $\text{kJ}\cdot\text{mol}^{-1}$ ) for anion-anion complexes in gas phase.

**Table S1.** Molecular graph and geometry of the complexes calculated at M06-2x/aug-cc-pVTZ computational level.

|                                                                                     |                                                                                                                                                                                                                                                                                                                                                                                                                                                                                                                                                                                                                                                                                                                                                                                                                                                                                                                                                                                                                                                                                                                                                                                                              |
|-------------------------------------------------------------------------------------|--------------------------------------------------------------------------------------------------------------------------------------------------------------------------------------------------------------------------------------------------------------------------------------------------------------------------------------------------------------------------------------------------------------------------------------------------------------------------------------------------------------------------------------------------------------------------------------------------------------------------------------------------------------------------------------------------------------------------------------------------------------------------------------------------------------------------------------------------------------------------------------------------------------------------------------------------------------------------------------------------------------------------------------------------------------------------------------------------------------------------------------------------------------------------------------------------------------|
| 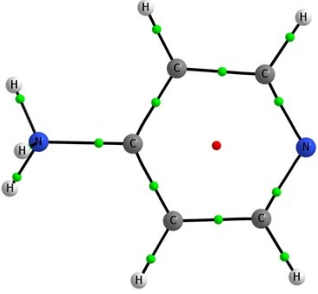   | <p><b>1[NH<sub>3</sub><sup>+</sup>,N]</b><br/>           C,1.1392877293,-1.2458304157,0.0228510373<br/>           C,1.2060194564,0.1443329148,0.0289917499<br/>           C,0.001020852,0.8100339235,0.0065914568<br/>           C,-1.2055416211,0.14907477,-0.0210475252<br/>           C,-1.14414452,-1.2422304306,-0.0246464365<br/>           N,-0.0039541118,-1.9188279471,-0.0036721247<br/>           H,2.049373791,-1.8316895086,0.0421136263<br/>           H,2.1587519792,0.6568187429,0.0526016566<br/>           H,-2.1568770316,0.6646039775,-0.037039961<br/>           H,-2.0567172853,-1.8242714199,-0.0434130896<br/>           N,0.0056961687,2.29714564,-0.0071987345<br/>           H,0.758571764,2.6680801466,0.5790910626<br/>           H,0.1409751621,2.6586419814,-0.9565780718<br/>           H,-0.8795643329,2.6693656254,0.3463553541</p>                                                                                                                                                                                                                                                                                                                                        |
|   | <p><b>1[NH<sub>3</sub><sup>+</sup>,N]:ClNH<sub>3</sub><sup>+</sup></b><br/>           C,0.4470959879,-1.1475898563,0.0325729689<br/>           C,1.8334051009,-1.2024665067,0.0354782266<br/>           C,2.502039314,0.004438342,-0.0020100317<br/>           C,1.8360615951,1.2100116527,-0.040519784<br/>           C,0.4471975225,1.1574490246,-0.0400154573<br/>           N,-0.2132499385,0.0062912907,-0.0042835378<br/>           H,-0.1440371859,-2.0538244551,0.0604979015<br/>           H,2.3440474806,-2.1561393171,0.0658367387<br/>           H,2.345868522,2.1641795256,-0.0702404352<br/>           H,-0.1415642088,2.0652467066,-0.0692049901<br/>           Cl,-2.4806933215,0.0024187665,-0.0048321545<br/>           N,-4.3142790012,-0.0050319983,-0.0044853307<br/>           H,-4.652461084,-0.3992352809,0.8753879252<br/>           H,-4.6586103105,0.9517205595,-0.1035313007<br/>           H,-4.6518032034,-0.5706934564,-0.7855203111<br/>           N,3.9861499977,-0.0034306282,0.0012902565<br/>           H,4.3559404918,-0.4322239626,0.8582111022<br/>           H,4.3594224632,-0.5330189168,-0.7955177923<br/>           H,4.3673437782,0.9466155102,-0.0559389943</p> |
|  | <p><b>1[NH<sub>3</sub><sup>+</sup>,N]:BrNH<sub>3</sub><sup>+</sup></b><br/>           C,-0.6928012663,-0.8360207735,-0.0456363405<br/>           C,0.6933805304,-0.8341687111,-0.0505528194<br/>           C,1.3158911647,0.3971579417,-0.0002684412<br/>           C,0.6043431104,1.5763423939,0.0530000432<br/>           C,-0.7804884188,1.4747781646,0.0536587265<br/>           N,-1.392656464,0.2957589043,0.0052082344<br/>           H,-1.2532975893,-1.761005976,-0.0832241343<br/>           H,1.2391467454,-1.7678097237,-0.0925213335<br/>           H,1.0765959511,2.5493262609,0.0928978032<br/>           H,-1.4074536695,2.356045981,0.0936951027<br/>           Br,-3.6229067757,0.2136061738,0.0021261617<br/>           N,-5.6598998449,0.1396594687,-0.00352141<br/>           H,-6.0088948289,0.093479565,0.9530801452<br/>           H,-6.0357393584,0.9727492956,-0.4548569157<br/>           H,-5.9758292223,-0.6846410399,-0.5130493773<br/>           N,2.7985951512,0.4454678902,-0.0039298319<br/>           H,3.1915528111,-0.0524619284,0.8043810306<br/>           H,3.185332377,0.0121719287,-0.8514990272<br/>           H,3.1448998668,1.4101408245,0.0323866434</p>       |

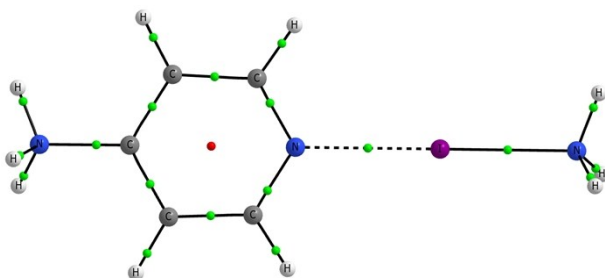

**1[NH<sub>3</sub><sup>+</sup>,N]:INH<sub>3</sub><sup>+</sup>**

C,1.3292910366,-1.1519571007,0.0247275912  
 C,2.714079731,-1.2023172362,0.0227441661  
 C,3.3833482327,0.0047452408,-0.0022281271  
 C,2.7154955401,1.2098725548,-0.0237733358  
 C,1.3282372168,1.1604445889,-0.019852361  
 N,0.6656463798,0.0053277307,0.0035899602  
 H,0.7384249199,-2.058421688,0.0433528991  
 H,3.2232254878,-2.1571727265,0.0399768525  
 H,3.2227047379,2.1657226613,-0.0433908594  
 H,0.7387152115,2.0679113896,-0.0362031665  
 I,-1.7089591328,0.0024262438,-0.0009719057  
 N,-3.9512099722,-0.0031663727,-0.0114150417  
 H,-4.3172727179,-0.112613492,0.9328557593  
 H,-4.3118252831,0.8695862964,-0.3931883688  
 H,-4.3061856771,-0.7695556913,-0.5808534658  
 N,4.8666635694,-0.0028832096,-0.0059157403  
 H,5.2408813723,-0.4639484876,0.8326276006  
 H,5.2365081286,-0.5024159101,-0.8241006918  
 H,5.2489992187,0.9485132084,-0.029059765

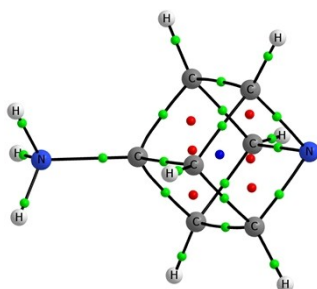

**2[NH<sub>3</sub><sup>+</sup>,N]**

N,-0.433127138,0.0005981605,0.0002825617  
 C,0.4455259738,0.8836073852,0.8594789483  
 C,0.4447547733,0.3023810075,-1.1947874698  
 C,1.3525603507,1.2388862854,-0.3509864401  
 C,0.4446870589,-1.1855668528,0.3351117367  
 C,1.3524196317,-0.9235098203,-0.8982971782  
 C,1.3529568883,-0.3164201773,1.247946197  
 C,2.2208928769,-0.0003926458,-0.0004050208  
 H,-0.0050399843,1.5908338308,1.5463902985  
 H,-0.0057122573,0.544418164,-2.1505601132  
 H,1.7188567177,2.2217597758,-0.6293967975  
 H,-0.0064099725,-2.133847633,0.6040603231  
 H,1.7185315609,-1.6558432089,-1.6105328485  
 H,1.7199914249,-0.5674341287,2.2379056144  
 N,3.7135561555,-0.0006308258,0.00125272  
 H,4.0814231465,-0.9204098381,0.2612189496  
 H,4.0805392265,0.6837038459,0.6688961801  
 H,4.0828935664,0.2347856756,-0.9244416616

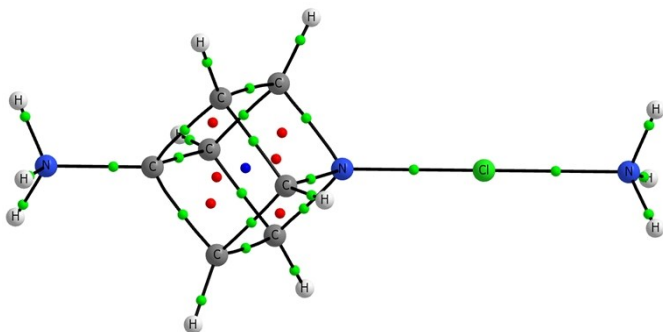

**2[NH<sub>3</sub><sup>+</sup>,N]:CINH<sub>3</sub><sup>+</sup>**

N,0.3785752156,-0.0680549655,-0.1728418529  
 C,-0.9236093641,-0.713422797,-0.6262227973  
 C,-0.3076837204,1.2887630586,-0.095305822  
 C,-1.6444310637,0.660179109,-0.5725461663  
 C,0.0227467753,-0.3443956243,1.2812668637  
 C,-0.6691218564,1.0406869743,1.3940346782  
 C,-1.3039443353,-1.023381955,0.84688833  
 C,-1.9953537457,0.3722101296,0.9191869952  
 H,-0.9072044744,-1.4100490851,-1.4564756169  
 H,0.1901415532,2.1578257532,-0.5095707663  
 H,-2.3042737674,1.0643876372,-1.3318920019  
 H,0.7786630565,-0.7515471225,1.9426231699  
 H,-0.5488002424,1.7492374216,2.2057153572  
 H,-1.6911769747,-1.9643188543,1.2210253412  
 N,-3.3260819692,0.6190923745,1.5315356165  
 H,-3.3367888183,0.3614664646,2.5250508398  
 H,-4.0615546487,0.0745406626,1.0663078236  
 H,-3.5914911067,1.6086689711,1.4690722861

|                                                                                     |                                                                                                                                                                                                                                                                                                                                                                                                                                                                                                                                                                                                                                                                                                                                                                                                                                                                                                                                                                                                                                                                                                                                                                                                      |
|-------------------------------------------------------------------------------------|------------------------------------------------------------------------------------------------------------------------------------------------------------------------------------------------------------------------------------------------------------------------------------------------------------------------------------------------------------------------------------------------------------------------------------------------------------------------------------------------------------------------------------------------------------------------------------------------------------------------------------------------------------------------------------------------------------------------------------------------------------------------------------------------------------------------------------------------------------------------------------------------------------------------------------------------------------------------------------------------------------------------------------------------------------------------------------------------------------------------------------------------------------------------------------------------------|
|                                                                                     | <p>Cl,2.1513600485,-0.3986878917,-0.9910851812<br/> N,3.9594671884,-0.7361341829,-1.8246039537<br/> H,4.6662594249,-0.1879425012,-1.3407173492<br/> H,4.1907362512,-1.7236822934,-1.7507231381<br/> H,3.939258574,-0.4679122836,-2.8053296559</p>                                                                                                                                                                                                                                                                                                                                                                                                                                                                                                                                                                                                                                                                                                                                                                                                                                                                                                                                                    |
| 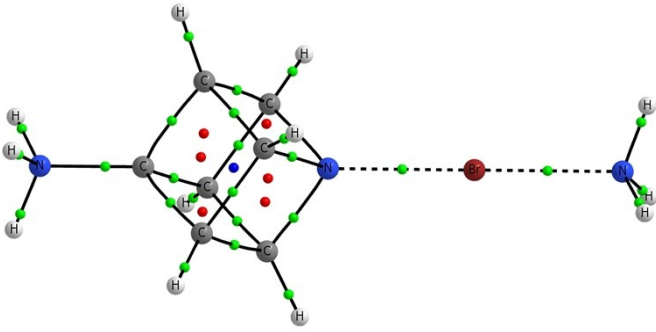   | <p><b>2[NH<sub>3</sub><sup>+</sup>,N]:BrNH<sub>3</sub><sup>+</sup></b><br/> N,-0.3777008414,-0.0017722903,0.0008369337<br/> C,0.4988434918,0.8845266395,0.8783185999<br/> C,0.4995000043,0.3165879437,-1.2045967557<br/> C,1.3953848821,1.2405219763,-0.3376203062<br/> C,0.5005651632,-1.2039097753,0.3288400919<br/> C,1.396568336,-0.9135092891,-0.9047794734<br/> C,1.3964723107,-0.3274640515,1.2440454504<br/> C,2.2775518089,0.0002303735,0.0005765602<br/> H,0.0282940185,1.5774051688,1.5662672465<br/> H,0.0296063421,0.5645720939,-2.1491378708<br/> H,1.7391682037,2.2324352756,-0.6080462119<br/> H,0.0314883038,-2.1463959902,0.586055327<br/> H,1.7413288422,-1.6430033411,-1.6287472235<br/> H,1.7419511044,-0.5886100145,2.237864256<br/> N,3.7635145737,0.0008779576,0.0004723955<br/> H,4.1402378551,-0.9198447684,0.2528015857<br/> H,4.1395236912,0.6801943465,0.6716864385<br/> H,4.1391351715,0.2431450742,-0.9234750907<br/> Br,-2.4842140751,-0.0011382102,0.0002353311<br/> N,-4.6157355442,-0.0002429799,-0.0012922013<br/> H,-4.9657598734,-0.5650026891,-0.7715327789<br/> H,-4.9669862223,-0.3845008145,0.872661865<br/> H,-4.9651075468,0.9493643643,-0.105804169</p> |
|  | <p><b>2[NH<sub>3</sub><sup>+</sup>,N]:INH<sub>3</sub><sup>+</sup></b><br/> C,1.3292910366,-1.1519571007,0.0247275912<br/> C,2.714079731,-1.2023172362,0.0227441661<br/> C,3.3833482327,0.0047452408,-0.0022281271<br/> C,2.7154955401,1.2098725548,-0.0237733358<br/> C,1.3282372168,1.1604445889,-0.019852361<br/> N,0.6656463798,0.0053277307,0.0035899602<br/> H,0.7384249199,-2.058421688,0.0433528991<br/> H,3.2232254878,-2.1571727265,0.0399768525<br/> H,3.2227047379,2.1657226613,-0.0433908594<br/> H,0.7387152115,2.0679113896,-0.0362031665<br/> I,-1.7089591328,0.0024262438,-0.0009719057<br/> N,-3.9512099722,-0.0031663727,-0.0114150417<br/> H,-4.3172727179,-0.112613492,0.9328557593<br/> H,-4.3118252831,0.8695862964,-0.3931883688<br/> H,-4.3061856771,-0.7695556913,-0.5808534658<br/> N,4.8666635694,-0.0028832096,-0.0059157403<br/> H,5.2408813723,-0.4639484876,0.8326276006<br/> H,5.2365081286,-0.5024159101,-0.8241006918<br/> H,5.2489992187,0.9485132084,-0.029059765</p>                                                                                                                                                                                            |

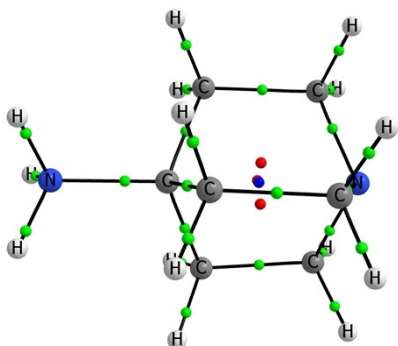

### 3[NH<sub>3</sub><sup>+</sup>,N]

C,-2.0135181341,0.392508367,-1.3862614476  
 C,-2.5023831589,-0.0004471326,0.0011677649  
 N,0.0174299691,0.0021032105,0.0012353347  
 C,-0.4520951239,0.4355494408,-1.3064165041  
 H,-2.4167270414,1.3671099491,-1.6703429493  
 H,-2.3480129981,-0.3404532421,-2.1240260511  
 H,-0.0929601129,1.4469376593,-1.4854915927  
 H,-0.0193412964,-0.2108237121,-2.0668507614  
 C,-2.0145777662,1.0055538433,1.034802991  
 H,-2.4165351886,0.7640460918,2.0213861057  
 H,-2.3510084984,2.0102089177,0.7684871247  
 C,-0.4530957263,0.9171373392,1.0308389111  
 H,-0.0930173288,0.5668011385,1.9960201618  
 H,-0.0219320651,1.8996374319,0.8517882092  
 C,-0.450729415,-1.3478414259,0.2788012721  
 H,-0.0174666698,-1.6844021725,1.218113789  
 H,-0.0914894087,-2.0072985903,-0.5085559165  
 C,-2.0121101049,-1.3975875676,0.3558958379  
 H,-2.3460410112,-1.6686470847,1.3600525482  
 H,-2.414429796,-2.1323904435,-0.3449965327  
 N,-4.0224229269,-0.0021061296,0.0001601474  
 H,-4.3830202182,-0.6585028664,-0.6971911349  
 H,-4.3847940486,-0.2781430182,0.9165273715  
 H,-4.3851197383,0.9291553753,-0.2198204012

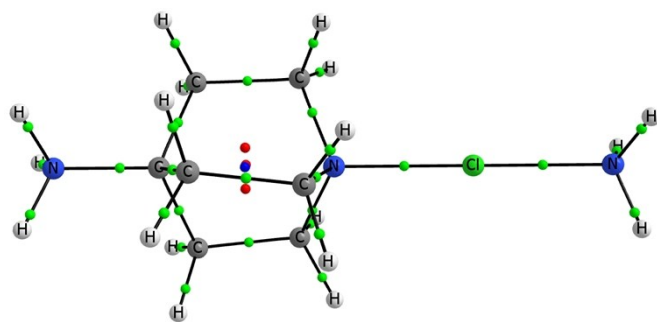

### 3[NH<sub>3</sub><sup>+</sup>,N]:ClNH<sub>3</sub><sup>+</sup>

C,-2.0014233894,0.3350245212,-1.4014242726  
 C,-2.5050433958,-0.0003724781,0.000833741  
 N,0.0117893972,0.000454417,0.0015425444  
 C,-0.4639850312,0.5024259562,-1.3090931444  
 H,-2.4511432471,1.2587618694,-1.7684858843  
 H,-2.2598113353,-0.4649817096,-2.097339969  
 H,-0.1670320094,1.5464362188,-1.3862269987  
 H,0.0440328595,-0.0566751717,-2.0909852149  
 C,-2.0022122986,1.0466916236,0.9922319762  
 H,-2.4516528912,0.9019536566,1.9757573356  
 H,-2.2615561692,2.0489382861,0.646797833  
 C,-0.4648487857,0.8846062933,1.090878423  
 H,-0.1672023804,0.4309560656,2.0339660835  
 H,0.0420656256,1.8416772244,0.9958583797  
 C,-0.4638190559,-1.3851746032,0.2223443259  
 H,0.0437061252,-1.7806937017,1.0987585404  
 H,-0.1647922291,-1.9745518001,-0.6420664898  
 C,-2.0011652458,-1.3819336308,0.412402353  
 H,-2.259796394,-1.582980066,1.453387282  
 H,-2.4509016938,-2.1620870934,-0.2033887831  
 N,-4.0196768298,-0.0012713436,0.0005201054  
 H,-4.3922517645,-0.6624507052,-0.6889207198  
 H,-4.3926670938,-0.2683708449,0.9174482974  
 H,-4.3933841905,0.9259298049,-0.227103915  
 Cl,2.0200032307,0.0022387965,0.002373659  
 N,4.0421747931,0.0075067962,0.0036253437  
 H,4.3853802214,-0.5061858383,-0.8043069757  
 H,4.380786527,0.9656775115,-0.0375717137  
 H,4.3840046515,-0.4341290547,0.853609858

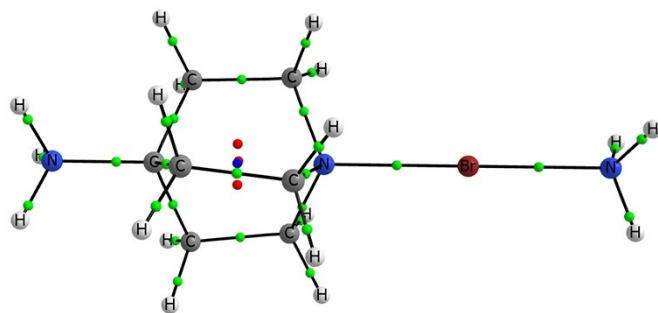

**3[NH<sub>3</sub><sup>+</sup>, N]:BrNH<sub>3</sub><sup>+</sup>**

C,0,-2.0425758368,1.1398970719,0.8816416365  
 C,0,-2.5455278557,-0.0001887764,-0.0003715889  
 N,0,-0.0207734024,-0.0003251097,0.0008098403  
 C,0,-0.5047850817,0.9893724142,0.9945381197  
 H,0,-2.4921954696,1.0941494696,1.8743763826  
 H,0,-2.3032153679,2.1025532765,0.4384687885  
 H,0,-0.2073676114,0.6352230147,1.9794317869  
 H,0,-0.0017984783,1.9346715754,0.8065485815  
 C,0,-2.0427203002,-1.3338722,0.5460495736  
 H,0,-2.491033679,-2.1711865834,0.0092387883  
 H,0,-2.3043735625,-1.432221864,1.6007811074  
 C,0,-0.5048124142,-1.3557200448,0.3606145167  
 H,0,-0.207434862,-2.0317040529,-0.4386306389  
 H,0,-0.0023922005,-1.665109833,1.2736121683  
 C,0,-0.5039278773,0.3655549712,-1.3533357027  
 H,0,-0.0003728894,-0.2706500519,-2.0766388013  
 H,0,-0.2058411557,1.3953731993,-1.5398626561  
 C,0,-2.041739602,0.1936233557,-1.4284748113  
 H,0,-2.3015252331,-0.6713959945,-2.0407433927  
 H,0,-2.4895438819,1.0771927075,-1.8853182791  
 N,0,-4.0607101072,0.0004157944,-0.000993223  
 H,0,-4.4317588205,0.9012030124,-0.3198706755  
 H,0,-4.4335697804,-0.725467705,-0.6214176969  
 H,0,-4.4338304107,-0.1733976163,0.937852629  
 Br,0,2.1266012672,0.0000233735,0.0001147665  
 N,0,4.2509677457,0.0002791843,-0.0007794277  
 H,0,4.5997576013,0.9562048478,0.0032786347  
 H,0,4.6008493263,-0.4811822268,0.8245360392  
 H,0,4.5990999799,-0.4738578295,-0.8310713358

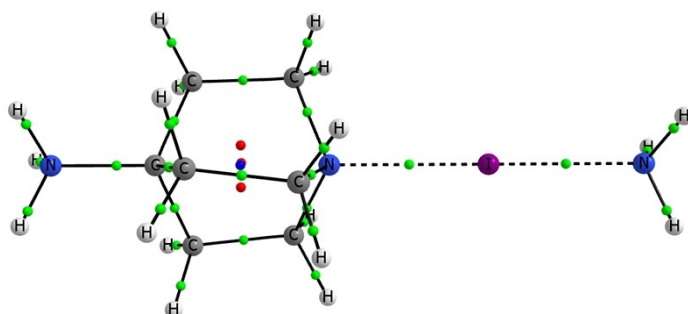

**3[NH<sub>3</sub><sup>+</sup>, N]:INH<sub>3</sub><sup>+</sup>**

C,-2.432619,0.196373,-1.426454  
 C,-2.935269,-0.000713,0.000458  
 N,-0.400697,0.001249,-0.000676  
 C,-0.895863,0.376051,-1.350307  
 H,-2.884851,1.077941,-1.883251  
 H,-2.688666,-0.669622,-2.039418  
 H,-0.607021,1.410108,-1.529511  
 H,-0.393344,-0.247659,-2.085819  
 C,-2.432358,1.136946,0.883372  
 H,-2.884285,1.092206,1.875341  
 H,-2.689371,2.100288,0.439292  
 C,-0.895749,0.981694,0.999652  
 H,-0.605815,0.619363,1.984364  
 H,-0.393854,1.930827,0.827273  
 C,-0.894185,-1.356204,0.348939  
 H,-0.391059,-1.680988,1.25666  
 H,-0.604893,-2.02719,-0.457861  
 C,-2.43075,-1.333986,0.543045  
 H,-2.686547,-1.432182,1.599505  
 H,-2.882766,-2.170856,0.008556  
 N,-4.450601,-0.00199,0.001175  
 H,-4.822731,-0.725575,-0.622288  
 H,-4.822315,-0.180838,0.939738  
 H,-4.824045,0.899556,-0.312969  
 I,1.93144,0.000836,-0.000098  
 N,4.218987,-0.003285,0.000897  
 H,4.57987,-0.597519,-0.74246  
 H,4.583202,0.936482,-0.140819



|                                                                                     |                                                                                                                                                                                                                                                                                                                                                                                                                                                                                                                                                                                                                                                                                                                                                                                                                                                                                                                                                                                                                                                                                                                                                                                                                                                                                                                                |             |             |            |             |   |            |            |             |   |            |             |             |   |            |            |             |   |            |             |             |   |            |            |             |   |            |             |             |   |            |             |             |   |            |            |             |   |            |            |             |   |            |            |            |   |            |             |            |   |            |            |            |    |            |            |            |   |            |            |            |
|-------------------------------------------------------------------------------------|--------------------------------------------------------------------------------------------------------------------------------------------------------------------------------------------------------------------------------------------------------------------------------------------------------------------------------------------------------------------------------------------------------------------------------------------------------------------------------------------------------------------------------------------------------------------------------------------------------------------------------------------------------------------------------------------------------------------------------------------------------------------------------------------------------------------------------------------------------------------------------------------------------------------------------------------------------------------------------------------------------------------------------------------------------------------------------------------------------------------------------------------------------------------------------------------------------------------------------------------------------------------------------------------------------------------------------|-------------|-------------|------------|-------------|---|------------|------------|-------------|---|------------|-------------|-------------|---|------------|------------|-------------|---|------------|-------------|-------------|---|------------|------------|-------------|---|------------|-------------|-------------|---|------------|-------------|-------------|---|------------|------------|-------------|---|------------|------------|-------------|---|------------|------------|------------|---|------------|-------------|------------|---|------------|------------|------------|----|------------|------------|------------|---|------------|------------|------------|
| 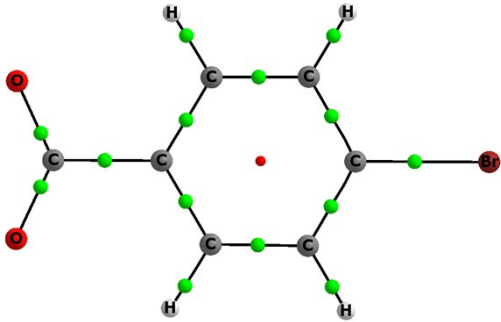   | <p>H,4.579096,-0.351458,0.88688</p> <p><b>1[CO<sub>2</sub><sup>-</sup>,C-Br]</b></p> <table border="1"> <tbody> <tr><td>C</td><td>0.00000000</td><td>0.00000000</td><td>-3.37785200</td></tr> <tr><td>O</td><td>0.00000000</td><td>1.12878500</td><td>-3.90236400</td></tr> <tr><td>O</td><td>0.00000000</td><td>-1.12878500</td><td>-3.90236400</td></tr> <tr><td>C</td><td>0.00000000</td><td>0.00000000</td><td>-1.82875900</td></tr> <tr><td>C</td><td>0.00000000</td><td>-1.19549700</td><td>-1.12021500</td></tr> <tr><td>C</td><td>0.00000000</td><td>1.19549700</td><td>-1.12021500</td></tr> <tr><td>C</td><td>0.00000000</td><td>-1.20964900</td><td>0.26906300</td></tr> <tr><td>H</td><td>0.00000000</td><td>-2.11363300</td><td>-1.69299700</td></tr> <tr><td>C</td><td>0.00000000</td><td>1.20964900</td><td>0.26906300</td></tr> <tr><td>H</td><td>0.00000000</td><td>2.11363300</td><td>-1.69299700</td></tr> <tr><td>C</td><td>0.00000000</td><td>0.00000000</td><td>0.94285700</td></tr> <tr><td>H</td><td>0.00000000</td><td>-2.13900300</td><td>0.82179700</td></tr> <tr><td>H</td><td>0.00000000</td><td>2.13900300</td><td>0.82179700</td></tr> <tr><td>Br</td><td>0.00000000</td><td>0.00000000</td><td>2.85647400</td></tr> </tbody> </table>                                                          | C           | 0.00000000  | 0.00000000 | -3.37785200 | O | 0.00000000 | 1.12878500 | -3.90236400 | O | 0.00000000 | -1.12878500 | -3.90236400 | C | 0.00000000 | 0.00000000 | -1.82875900 | C | 0.00000000 | -1.19549700 | -1.12021500 | C | 0.00000000 | 1.19549700 | -1.12021500 | C | 0.00000000 | -1.20964900 | 0.26906300  | H | 0.00000000 | -2.11363300 | -1.69299700 | C | 0.00000000 | 1.20964900 | 0.26906300  | H | 0.00000000 | 2.11363300 | -1.69299700 | C | 0.00000000 | 0.00000000 | 0.94285700 | H | 0.00000000 | -2.13900300 | 0.82179700 | H | 0.00000000 | 2.13900300 | 0.82179700 | Br | 0.00000000 | 0.00000000 | 2.85647400 |   |            |            |            |
| C                                                                                   | 0.00000000                                                                                                                                                                                                                                                                                                                                                                                                                                                                                                                                                                                                                                                                                                                                                                                                                                                                                                                                                                                                                                                                                                                                                                                                                                                                                                                     | 0.00000000  | -3.37785200 |            |             |   |            |            |             |   |            |             |             |   |            |            |             |   |            |             |             |   |            |            |             |   |            |             |             |   |            |             |             |   |            |            |             |   |            |            |             |   |            |            |            |   |            |             |            |   |            |            |            |    |            |            |            |   |            |            |            |
| O                                                                                   | 0.00000000                                                                                                                                                                                                                                                                                                                                                                                                                                                                                                                                                                                                                                                                                                                                                                                                                                                                                                                                                                                                                                                                                                                                                                                                                                                                                                                     | 1.12878500  | -3.90236400 |            |             |   |            |            |             |   |            |             |             |   |            |            |             |   |            |             |             |   |            |            |             |   |            |             |             |   |            |             |             |   |            |            |             |   |            |            |             |   |            |            |            |   |            |             |            |   |            |            |            |    |            |            |            |   |            |            |            |
| O                                                                                   | 0.00000000                                                                                                                                                                                                                                                                                                                                                                                                                                                                                                                                                                                                                                                                                                                                                                                                                                                                                                                                                                                                                                                                                                                                                                                                                                                                                                                     | -1.12878500 | -3.90236400 |            |             |   |            |            |             |   |            |             |             |   |            |            |             |   |            |             |             |   |            |            |             |   |            |             |             |   |            |             |             |   |            |            |             |   |            |            |             |   |            |            |            |   |            |             |            |   |            |            |            |    |            |            |            |   |            |            |            |
| C                                                                                   | 0.00000000                                                                                                                                                                                                                                                                                                                                                                                                                                                                                                                                                                                                                                                                                                                                                                                                                                                                                                                                                                                                                                                                                                                                                                                                                                                                                                                     | 0.00000000  | -1.82875900 |            |             |   |            |            |             |   |            |             |             |   |            |            |             |   |            |             |             |   |            |            |             |   |            |             |             |   |            |             |             |   |            |            |             |   |            |            |             |   |            |            |            |   |            |             |            |   |            |            |            |    |            |            |            |   |            |            |            |
| C                                                                                   | 0.00000000                                                                                                                                                                                                                                                                                                                                                                                                                                                                                                                                                                                                                                                                                                                                                                                                                                                                                                                                                                                                                                                                                                                                                                                                                                                                                                                     | -1.19549700 | -1.12021500 |            |             |   |            |            |             |   |            |             |             |   |            |            |             |   |            |             |             |   |            |            |             |   |            |             |             |   |            |             |             |   |            |            |             |   |            |            |             |   |            |            |            |   |            |             |            |   |            |            |            |    |            |            |            |   |            |            |            |
| C                                                                                   | 0.00000000                                                                                                                                                                                                                                                                                                                                                                                                                                                                                                                                                                                                                                                                                                                                                                                                                                                                                                                                                                                                                                                                                                                                                                                                                                                                                                                     | 1.19549700  | -1.12021500 |            |             |   |            |            |             |   |            |             |             |   |            |            |             |   |            |             |             |   |            |            |             |   |            |             |             |   |            |             |             |   |            |            |             |   |            |            |             |   |            |            |            |   |            |             |            |   |            |            |            |    |            |            |            |   |            |            |            |
| C                                                                                   | 0.00000000                                                                                                                                                                                                                                                                                                                                                                                                                                                                                                                                                                                                                                                                                                                                                                                                                                                                                                                                                                                                                                                                                                                                                                                                                                                                                                                     | -1.20964900 | 0.26906300  |            |             |   |            |            |             |   |            |             |             |   |            |            |             |   |            |             |             |   |            |            |             |   |            |             |             |   |            |             |             |   |            |            |             |   |            |            |             |   |            |            |            |   |            |             |            |   |            |            |            |    |            |            |            |   |            |            |            |
| H                                                                                   | 0.00000000                                                                                                                                                                                                                                                                                                                                                                                                                                                                                                                                                                                                                                                                                                                                                                                                                                                                                                                                                                                                                                                                                                                                                                                                                                                                                                                     | -2.11363300 | -1.69299700 |            |             |   |            |            |             |   |            |             |             |   |            |            |             |   |            |             |             |   |            |            |             |   |            |             |             |   |            |             |             |   |            |            |             |   |            |            |             |   |            |            |            |   |            |             |            |   |            |            |            |    |            |            |            |   |            |            |            |
| C                                                                                   | 0.00000000                                                                                                                                                                                                                                                                                                                                                                                                                                                                                                                                                                                                                                                                                                                                                                                                                                                                                                                                                                                                                                                                                                                                                                                                                                                                                                                     | 1.20964900  | 0.26906300  |            |             |   |            |            |             |   |            |             |             |   |            |            |             |   |            |             |             |   |            |            |             |   |            |             |             |   |            |             |             |   |            |            |             |   |            |            |             |   |            |            |            |   |            |             |            |   |            |            |            |    |            |            |            |   |            |            |            |
| H                                                                                   | 0.00000000                                                                                                                                                                                                                                                                                                                                                                                                                                                                                                                                                                                                                                                                                                                                                                                                                                                                                                                                                                                                                                                                                                                                                                                                                                                                                                                     | 2.11363300  | -1.69299700 |            |             |   |            |            |             |   |            |             |             |   |            |            |             |   |            |             |             |   |            |            |             |   |            |             |             |   |            |             |             |   |            |            |             |   |            |            |             |   |            |            |            |   |            |             |            |   |            |            |            |    |            |            |            |   |            |            |            |
| C                                                                                   | 0.00000000                                                                                                                                                                                                                                                                                                                                                                                                                                                                                                                                                                                                                                                                                                                                                                                                                                                                                                                                                                                                                                                                                                                                                                                                                                                                                                                     | 0.00000000  | 0.94285700  |            |             |   |            |            |             |   |            |             |             |   |            |            |             |   |            |             |             |   |            |            |             |   |            |             |             |   |            |             |             |   |            |            |             |   |            |            |             |   |            |            |            |   |            |             |            |   |            |            |            |    |            |            |            |   |            |            |            |
| H                                                                                   | 0.00000000                                                                                                                                                                                                                                                                                                                                                                                                                                                                                                                                                                                                                                                                                                                                                                                                                                                                                                                                                                                                                                                                                                                                                                                                                                                                                                                     | -2.13900300 | 0.82179700  |            |             |   |            |            |             |   |            |             |             |   |            |            |             |   |            |             |             |   |            |            |             |   |            |             |             |   |            |             |             |   |            |            |             |   |            |            |             |   |            |            |            |   |            |             |            |   |            |            |            |    |            |            |            |   |            |            |            |
| H                                                                                   | 0.00000000                                                                                                                                                                                                                                                                                                                                                                                                                                                                                                                                                                                                                                                                                                                                                                                                                                                                                                                                                                                                                                                                                                                                                                                                                                                                                                                     | 2.13900300  | 0.82179700  |            |             |   |            |            |             |   |            |             |             |   |            |            |             |   |            |             |             |   |            |            |             |   |            |             |             |   |            |             |             |   |            |            |             |   |            |            |             |   |            |            |            |   |            |             |            |   |            |            |            |    |            |            |            |   |            |            |            |
| Br                                                                                  | 0.00000000                                                                                                                                                                                                                                                                                                                                                                                                                                                                                                                                                                                                                                                                                                                                                                                                                                                                                                                                                                                                                                                                                                                                                                                                                                                                                                                     | 0.00000000  | 2.85647400  |            |             |   |            |            |             |   |            |             |             |   |            |            |             |   |            |             |             |   |            |            |             |   |            |             |             |   |            |             |             |   |            |            |             |   |            |            |             |   |            |            |            |   |            |             |            |   |            |            |            |    |            |            |            |   |            |            |            |
|   | <p><b>1[CO<sub>2</sub><sup>-</sup>,C-Br]:F<sup>-</sup></b></p> <table border="1"> <tbody> <tr><td>C</td><td>0.00000000</td><td>0.00000000</td><td>-3.85906400</td></tr> <tr><td>O</td><td>0.00000000</td><td>1.12547000</td><td>-4.40214000</td></tr> <tr><td>O</td><td>0.00000000</td><td>-1.12547000</td><td>-4.40214000</td></tr> <tr><td>C</td><td>0.00000000</td><td>0.00000000</td><td>-2.31530700</td></tr> <tr><td>C</td><td>0.00000000</td><td>-1.19072900</td><td>-1.59632000</td></tr> <tr><td>C</td><td>0.00000000</td><td>1.19072900</td><td>-1.59632000</td></tr> <tr><td>C</td><td>0.00000000</td><td>-1.19716900</td><td>-0.20589200</td></tr> <tr><td>H</td><td>0.00000000</td><td>-2.11460600</td><td>-2.16079600</td></tr> <tr><td>C</td><td>0.00000000</td><td>1.19716900</td><td>-0.20589200</td></tr> <tr><td>H</td><td>0.00000000</td><td>2.11460600</td><td>-2.16079600</td></tr> <tr><td>C</td><td>0.00000000</td><td>0.00000000</td><td>0.50358200</td></tr> <tr><td>H</td><td>0.00000000</td><td>-2.13168900</td><td>0.34130800</td></tr> <tr><td>H</td><td>0.00000000</td><td>2.13168900</td><td>0.34130800</td></tr> <tr><td>Br</td><td>0.00000000</td><td>0.00000000</td><td>2.41715800</td></tr> <tr><td>F</td><td>0.00000000</td><td>0.00000000</td><td>5.01377500</td></tr> </tbody> </table> | C           | 0.00000000  | 0.00000000 | -3.85906400 | O | 0.00000000 | 1.12547000 | -4.40214000 | O | 0.00000000 | -1.12547000 | -4.40214000 | C | 0.00000000 | 0.00000000 | -2.31530700 | C | 0.00000000 | -1.19072900 | -1.59632000 | C | 0.00000000 | 1.19072900 | -1.59632000 | C | 0.00000000 | -1.19716900 | -0.20589200 | H | 0.00000000 | -2.11460600 | -2.16079600 | C | 0.00000000 | 1.19716900 | -0.20589200 | H | 0.00000000 | 2.11460600 | -2.16079600 | C | 0.00000000 | 0.00000000 | 0.50358200 | H | 0.00000000 | -2.13168900 | 0.34130800 | H | 0.00000000 | 2.13168900 | 0.34130800 | Br | 0.00000000 | 0.00000000 | 2.41715800 | F | 0.00000000 | 0.00000000 | 5.01377500 |
| C                                                                                   | 0.00000000                                                                                                                                                                                                                                                                                                                                                                                                                                                                                                                                                                                                                                                                                                                                                                                                                                                                                                                                                                                                                                                                                                                                                                                                                                                                                                                     | 0.00000000  | -3.85906400 |            |             |   |            |            |             |   |            |             |             |   |            |            |             |   |            |             |             |   |            |            |             |   |            |             |             |   |            |             |             |   |            |            |             |   |            |            |             |   |            |            |            |   |            |             |            |   |            |            |            |    |            |            |            |   |            |            |            |
| O                                                                                   | 0.00000000                                                                                                                                                                                                                                                                                                                                                                                                                                                                                                                                                                                                                                                                                                                                                                                                                                                                                                                                                                                                                                                                                                                                                                                                                                                                                                                     | 1.12547000  | -4.40214000 |            |             |   |            |            |             |   |            |             |             |   |            |            |             |   |            |             |             |   |            |            |             |   |            |             |             |   |            |             |             |   |            |            |             |   |            |            |             |   |            |            |            |   |            |             |            |   |            |            |            |    |            |            |            |   |            |            |            |
| O                                                                                   | 0.00000000                                                                                                                                                                                                                                                                                                                                                                                                                                                                                                                                                                                                                                                                                                                                                                                                                                                                                                                                                                                                                                                                                                                                                                                                                                                                                                                     | -1.12547000 | -4.40214000 |            |             |   |            |            |             |   |            |             |             |   |            |            |             |   |            |             |             |   |            |            |             |   |            |             |             |   |            |             |             |   |            |            |             |   |            |            |             |   |            |            |            |   |            |             |            |   |            |            |            |    |            |            |            |   |            |            |            |
| C                                                                                   | 0.00000000                                                                                                                                                                                                                                                                                                                                                                                                                                                                                                                                                                                                                                                                                                                                                                                                                                                                                                                                                                                                                                                                                                                                                                                                                                                                                                                     | 0.00000000  | -2.31530700 |            |             |   |            |            |             |   |            |             |             |   |            |            |             |   |            |             |             |   |            |            |             |   |            |             |             |   |            |             |             |   |            |            |             |   |            |            |             |   |            |            |            |   |            |             |            |   |            |            |            |    |            |            |            |   |            |            |            |
| C                                                                                   | 0.00000000                                                                                                                                                                                                                                                                                                                                                                                                                                                                                                                                                                                                                                                                                                                                                                                                                                                                                                                                                                                                                                                                                                                                                                                                                                                                                                                     | -1.19072900 | -1.59632000 |            |             |   |            |            |             |   |            |             |             |   |            |            |             |   |            |             |             |   |            |            |             |   |            |             |             |   |            |             |             |   |            |            |             |   |            |            |             |   |            |            |            |   |            |             |            |   |            |            |            |    |            |            |            |   |            |            |            |
| C                                                                                   | 0.00000000                                                                                                                                                                                                                                                                                                                                                                                                                                                                                                                                                                                                                                                                                                                                                                                                                                                                                                                                                                                                                                                                                                                                                                                                                                                                                                                     | 1.19072900  | -1.59632000 |            |             |   |            |            |             |   |            |             |             |   |            |            |             |   |            |             |             |   |            |            |             |   |            |             |             |   |            |             |             |   |            |            |             |   |            |            |             |   |            |            |            |   |            |             |            |   |            |            |            |    |            |            |            |   |            |            |            |
| C                                                                                   | 0.00000000                                                                                                                                                                                                                                                                                                                                                                                                                                                                                                                                                                                                                                                                                                                                                                                                                                                                                                                                                                                                                                                                                                                                                                                                                                                                                                                     | -1.19716900 | -0.20589200 |            |             |   |            |            |             |   |            |             |             |   |            |            |             |   |            |             |             |   |            |            |             |   |            |             |             |   |            |             |             |   |            |            |             |   |            |            |             |   |            |            |            |   |            |             |            |   |            |            |            |    |            |            |            |   |            |            |            |
| H                                                                                   | 0.00000000                                                                                                                                                                                                                                                                                                                                                                                                                                                                                                                                                                                                                                                                                                                                                                                                                                                                                                                                                                                                                                                                                                                                                                                                                                                                                                                     | -2.11460600 | -2.16079600 |            |             |   |            |            |             |   |            |             |             |   |            |            |             |   |            |             |             |   |            |            |             |   |            |             |             |   |            |             |             |   |            |            |             |   |            |            |             |   |            |            |            |   |            |             |            |   |            |            |            |    |            |            |            |   |            |            |            |
| C                                                                                   | 0.00000000                                                                                                                                                                                                                                                                                                                                                                                                                                                                                                                                                                                                                                                                                                                                                                                                                                                                                                                                                                                                                                                                                                                                                                                                                                                                                                                     | 1.19716900  | -0.20589200 |            |             |   |            |            |             |   |            |             |             |   |            |            |             |   |            |             |             |   |            |            |             |   |            |             |             |   |            |             |             |   |            |            |             |   |            |            |             |   |            |            |            |   |            |             |            |   |            |            |            |    |            |            |            |   |            |            |            |
| H                                                                                   | 0.00000000                                                                                                                                                                                                                                                                                                                                                                                                                                                                                                                                                                                                                                                                                                                                                                                                                                                                                                                                                                                                                                                                                                                                                                                                                                                                                                                     | 2.11460600  | -2.16079600 |            |             |   |            |            |             |   |            |             |             |   |            |            |             |   |            |             |             |   |            |            |             |   |            |             |             |   |            |             |             |   |            |            |             |   |            |            |             |   |            |            |            |   |            |             |            |   |            |            |            |    |            |            |            |   |            |            |            |
| C                                                                                   | 0.00000000                                                                                                                                                                                                                                                                                                                                                                                                                                                                                                                                                                                                                                                                                                                                                                                                                                                                                                                                                                                                                                                                                                                                                                                                                                                                                                                     | 0.00000000  | 0.50358200  |            |             |   |            |            |             |   |            |             |             |   |            |            |             |   |            |             |             |   |            |            |             |   |            |             |             |   |            |             |             |   |            |            |             |   |            |            |             |   |            |            |            |   |            |             |            |   |            |            |            |    |            |            |            |   |            |            |            |
| H                                                                                   | 0.00000000                                                                                                                                                                                                                                                                                                                                                                                                                                                                                                                                                                                                                                                                                                                                                                                                                                                                                                                                                                                                                                                                                                                                                                                                                                                                                                                     | -2.13168900 | 0.34130800  |            |             |   |            |            |             |   |            |             |             |   |            |            |             |   |            |             |             |   |            |            |             |   |            |             |             |   |            |             |             |   |            |            |             |   |            |            |             |   |            |            |            |   |            |             |            |   |            |            |            |    |            |            |            |   |            |            |            |
| H                                                                                   | 0.00000000                                                                                                                                                                                                                                                                                                                                                                                                                                                                                                                                                                                                                                                                                                                                                                                                                                                                                                                                                                                                                                                                                                                                                                                                                                                                                                                     | 2.13168900  | 0.34130800  |            |             |   |            |            |             |   |            |             |             |   |            |            |             |   |            |             |             |   |            |            |             |   |            |             |             |   |            |             |             |   |            |            |             |   |            |            |             |   |            |            |            |   |            |             |            |   |            |            |            |    |            |            |            |   |            |            |            |
| Br                                                                                  | 0.00000000                                                                                                                                                                                                                                                                                                                                                                                                                                                                                                                                                                                                                                                                                                                                                                                                                                                                                                                                                                                                                                                                                                                                                                                                                                                                                                                     | 0.00000000  | 2.41715800  |            |             |   |            |            |             |   |            |             |             |   |            |            |             |   |            |             |             |   |            |            |             |   |            |             |             |   |            |             |             |   |            |            |             |   |            |            |             |   |            |            |            |   |            |             |            |   |            |            |            |    |            |            |            |   |            |            |            |
| F                                                                                   | 0.00000000                                                                                                                                                                                                                                                                                                                                                                                                                                                                                                                                                                                                                                                                                                                                                                                                                                                                                                                                                                                                                                                                                                                                                                                                                                                                                                                     | 0.00000000  | 5.01377500  |            |             |   |            |            |             |   |            |             |             |   |            |            |             |   |            |             |             |   |            |            |             |   |            |             |             |   |            |             |             |   |            |            |             |   |            |            |             |   |            |            |            |   |            |             |            |   |            |            |            |    |            |            |            |   |            |            |            |
|  | <p><b>1[CO<sub>2</sub><sup>-</sup>,C-I]</b></p> <table border="1"> <tbody> <tr><td>C</td><td>0.00000000</td><td>0.00000000</td><td>-3.91853400</td></tr> <tr><td>O</td><td>0.00000000</td><td>1.12892200</td><td>-4.44233500</td></tr> <tr><td>O</td><td>0.00000000</td><td>-1.12892200</td><td>-4.44233500</td></tr> <tr><td>C</td><td>0.00000000</td><td>0.00000000</td><td>-2.36909600</td></tr> <tr><td>C</td><td>0.00000000</td><td>-1.19543300</td><td>-1.66080700</td></tr> <tr><td>C</td><td>0.00000000</td><td>1.19543300</td><td>-1.66080700</td></tr> <tr><td>C</td><td>0.00000000</td><td>-1.21019400</td><td>-0.27112600</td></tr> <tr><td>H</td><td>0.00000000</td><td>-2.11378900</td><td>-2.23343900</td></tr> <tr><td>C</td><td>0.00000000</td><td>1.21019400</td><td>-0.27112600</td></tr> <tr><td>H</td><td>0.00000000</td><td>2.11378900</td><td>-2.23343900</td></tr> <tr><td>C</td><td>0.00000000</td><td>0.00000000</td><td>0.40405200</td></tr> <tr><td>H</td><td>0.00000000</td><td>-2.14352600</td><td>0.27506800</td></tr> <tr><td>H</td><td>0.00000000</td><td>2.14352600</td><td>0.27506800</td></tr> <tr><td>I</td><td>0.00000000</td><td>0.00000000</td><td>2.51846700</td></tr> </tbody> </table>                                                                                              | C           | 0.00000000  | 0.00000000 | -3.91853400 | O | 0.00000000 | 1.12892200 | -4.44233500 | O | 0.00000000 | -1.12892200 | -4.44233500 | C | 0.00000000 | 0.00000000 | -2.36909600 | C | 0.00000000 | -1.19543300 | -1.66080700 | C | 0.00000000 | 1.19543300 | -1.66080700 | C | 0.00000000 | -1.21019400 | -0.27112600 | H | 0.00000000 | -2.11378900 | -2.23343900 | C | 0.00000000 | 1.21019400 | -0.27112600 | H | 0.00000000 | 2.11378900 | -2.23343900 | C | 0.00000000 | 0.00000000 | 0.40405200 | H | 0.00000000 | -2.14352600 | 0.27506800 | H | 0.00000000 | 2.14352600 | 0.27506800 | I  | 0.00000000 | 0.00000000 | 2.51846700 |   |            |            |            |
| C                                                                                   | 0.00000000                                                                                                                                                                                                                                                                                                                                                                                                                                                                                                                                                                                                                                                                                                                                                                                                                                                                                                                                                                                                                                                                                                                                                                                                                                                                                                                     | 0.00000000  | -3.91853400 |            |             |   |            |            |             |   |            |             |             |   |            |            |             |   |            |             |             |   |            |            |             |   |            |             |             |   |            |             |             |   |            |            |             |   |            |            |             |   |            |            |            |   |            |             |            |   |            |            |            |    |            |            |            |   |            |            |            |
| O                                                                                   | 0.00000000                                                                                                                                                                                                                                                                                                                                                                                                                                                                                                                                                                                                                                                                                                                                                                                                                                                                                                                                                                                                                                                                                                                                                                                                                                                                                                                     | 1.12892200  | -4.44233500 |            |             |   |            |            |             |   |            |             |             |   |            |            |             |   |            |             |             |   |            |            |             |   |            |             |             |   |            |             |             |   |            |            |             |   |            |            |             |   |            |            |            |   |            |             |            |   |            |            |            |    |            |            |            |   |            |            |            |
| O                                                                                   | 0.00000000                                                                                                                                                                                                                                                                                                                                                                                                                                                                                                                                                                                                                                                                                                                                                                                                                                                                                                                                                                                                                                                                                                                                                                                                                                                                                                                     | -1.12892200 | -4.44233500 |            |             |   |            |            |             |   |            |             |             |   |            |            |             |   |            |             |             |   |            |            |             |   |            |             |             |   |            |             |             |   |            |            |             |   |            |            |             |   |            |            |            |   |            |             |            |   |            |            |            |    |            |            |            |   |            |            |            |
| C                                                                                   | 0.00000000                                                                                                                                                                                                                                                                                                                                                                                                                                                                                                                                                                                                                                                                                                                                                                                                                                                                                                                                                                                                                                                                                                                                                                                                                                                                                                                     | 0.00000000  | -2.36909600 |            |             |   |            |            |             |   |            |             |             |   |            |            |             |   |            |             |             |   |            |            |             |   |            |             |             |   |            |             |             |   |            |            |             |   |            |            |             |   |            |            |            |   |            |             |            |   |            |            |            |    |            |            |            |   |            |            |            |
| C                                                                                   | 0.00000000                                                                                                                                                                                                                                                                                                                                                                                                                                                                                                                                                                                                                                                                                                                                                                                                                                                                                                                                                                                                                                                                                                                                                                                                                                                                                                                     | -1.19543300 | -1.66080700 |            |             |   |            |            |             |   |            |             |             |   |            |            |             |   |            |             |             |   |            |            |             |   |            |             |             |   |            |             |             |   |            |            |             |   |            |            |             |   |            |            |            |   |            |             |            |   |            |            |            |    |            |            |            |   |            |            |            |
| C                                                                                   | 0.00000000                                                                                                                                                                                                                                                                                                                                                                                                                                                                                                                                                                                                                                                                                                                                                                                                                                                                                                                                                                                                                                                                                                                                                                                                                                                                                                                     | 1.19543300  | -1.66080700 |            |             |   |            |            |             |   |            |             |             |   |            |            |             |   |            |             |             |   |            |            |             |   |            |             |             |   |            |             |             |   |            |            |             |   |            |            |             |   |            |            |            |   |            |             |            |   |            |            |            |    |            |            |            |   |            |            |            |
| C                                                                                   | 0.00000000                                                                                                                                                                                                                                                                                                                                                                                                                                                                                                                                                                                                                                                                                                                                                                                                                                                                                                                                                                                                                                                                                                                                                                                                                                                                                                                     | -1.21019400 | -0.27112600 |            |             |   |            |            |             |   |            |             |             |   |            |            |             |   |            |             |             |   |            |            |             |   |            |             |             |   |            |             |             |   |            |            |             |   |            |            |             |   |            |            |            |   |            |             |            |   |            |            |            |    |            |            |            |   |            |            |            |
| H                                                                                   | 0.00000000                                                                                                                                                                                                                                                                                                                                                                                                                                                                                                                                                                                                                                                                                                                                                                                                                                                                                                                                                                                                                                                                                                                                                                                                                                                                                                                     | -2.11378900 | -2.23343900 |            |             |   |            |            |             |   |            |             |             |   |            |            |             |   |            |             |             |   |            |            |             |   |            |             |             |   |            |             |             |   |            |            |             |   |            |            |             |   |            |            |            |   |            |             |            |   |            |            |            |    |            |            |            |   |            |            |            |
| C                                                                                   | 0.00000000                                                                                                                                                                                                                                                                                                                                                                                                                                                                                                                                                                                                                                                                                                                                                                                                                                                                                                                                                                                                                                                                                                                                                                                                                                                                                                                     | 1.21019400  | -0.27112600 |            |             |   |            |            |             |   |            |             |             |   |            |            |             |   |            |             |             |   |            |            |             |   |            |             |             |   |            |             |             |   |            |            |             |   |            |            |             |   |            |            |            |   |            |             |            |   |            |            |            |    |            |            |            |   |            |            |            |
| H                                                                                   | 0.00000000                                                                                                                                                                                                                                                                                                                                                                                                                                                                                                                                                                                                                                                                                                                                                                                                                                                                                                                                                                                                                                                                                                                                                                                                                                                                                                                     | 2.11378900  | -2.23343900 |            |             |   |            |            |             |   |            |             |             |   |            |            |             |   |            |             |             |   |            |            |             |   |            |             |             |   |            |             |             |   |            |            |             |   |            |            |             |   |            |            |            |   |            |             |            |   |            |            |            |    |            |            |            |   |            |            |            |
| C                                                                                   | 0.00000000                                                                                                                                                                                                                                                                                                                                                                                                                                                                                                                                                                                                                                                                                                                                                                                                                                                                                                                                                                                                                                                                                                                                                                                                                                                                                                                     | 0.00000000  | 0.40405200  |            |             |   |            |            |             |   |            |             |             |   |            |            |             |   |            |             |             |   |            |            |             |   |            |             |             |   |            |             |             |   |            |            |             |   |            |            |             |   |            |            |            |   |            |             |            |   |            |            |            |    |            |            |            |   |            |            |            |
| H                                                                                   | 0.00000000                                                                                                                                                                                                                                                                                                                                                                                                                                                                                                                                                                                                                                                                                                                                                                                                                                                                                                                                                                                                                                                                                                                                                                                                                                                                                                                     | -2.14352600 | 0.27506800  |            |             |   |            |            |             |   |            |             |             |   |            |            |             |   |            |             |             |   |            |            |             |   |            |             |             |   |            |             |             |   |            |            |             |   |            |            |             |   |            |            |            |   |            |             |            |   |            |            |            |    |            |            |            |   |            |            |            |
| H                                                                                   | 0.00000000                                                                                                                                                                                                                                                                                                                                                                                                                                                                                                                                                                                                                                                                                                                                                                                                                                                                                                                                                                                                                                                                                                                                                                                                                                                                                                                     | 2.14352600  | 0.27506800  |            |             |   |            |            |             |   |            |             |             |   |            |            |             |   |            |             |             |   |            |            |             |   |            |             |             |   |            |             |             |   |            |            |             |   |            |            |             |   |            |            |            |   |            |             |            |   |            |            |            |    |            |            |            |   |            |            |            |
| I                                                                                   | 0.00000000                                                                                                                                                                                                                                                                                                                                                                                                                                                                                                                                                                                                                                                                                                                                                                                                                                                                                                                                                                                                                                                                                                                                                                                                                                                                                                                     | 0.00000000  | 2.51846700  |            |             |   |            |            |             |   |            |             |             |   |            |            |             |   |            |             |             |   |            |            |             |   |            |             |             |   |            |             |             |   |            |            |             |   |            |            |             |   |            |            |            |   |            |             |            |   |            |            |            |    |            |            |            |   |            |            |            |
|  | <p><b>1[CO<sub>2</sub><sup>-</sup>,C-I]:F<sup>-</sup></b></p> <table border="1"> <tbody> <tr><td>C</td><td>0.00000000</td><td>0.00000000</td><td>-4.32539900</td></tr> <tr><td>O</td><td>0.00000000</td><td>1.12516800</td><td>-4.87012300</td></tr> <tr><td>O</td><td>0.00000000</td><td>-1.12516800</td><td>-4.87012300</td></tr> <tr><td>C</td><td>0.00000000</td><td>0.00000000</td><td>-2.78139700</td></tr> <tr><td>C</td><td>0.00000000</td><td>-1.19010600</td><td>-2.06100700</td></tr> <tr><td>C</td><td>0.00000000</td><td>1.19010600</td><td>-2.06100700</td></tr> <tr><td>C</td><td>0.00000000</td><td>-1.19296400</td><td>-0.66930200</td></tr> <tr><td>H</td><td>0.00000000</td><td>-2.11483500</td><td>-2.62485300</td></tr> <tr><td>C</td><td>0.00000000</td><td>1.19296400</td><td>-0.66930200</td></tr> <tr><td>H</td><td>0.00000000</td><td>2.11483500</td><td>-2.62485300</td></tr> <tr><td>C</td><td>0.00000000</td><td>0.00000000</td><td>0.05175300</td></tr> </tbody> </table>                                                                                                                                                                                                                                                                                                                        | C           | 0.00000000  | 0.00000000 | -4.32539900 | O | 0.00000000 | 1.12516800 | -4.87012300 | O | 0.00000000 | -1.12516800 | -4.87012300 | C | 0.00000000 | 0.00000000 | -2.78139700 | C | 0.00000000 | -1.19010600 | -2.06100700 | C | 0.00000000 | 1.19010600 | -2.06100700 | C | 0.00000000 | -1.19296400 | -0.66930200 | H | 0.00000000 | -2.11483500 | -2.62485300 | C | 0.00000000 | 1.19296400 | -0.66930200 | H | 0.00000000 | 2.11483500 | -2.62485300 | C | 0.00000000 | 0.00000000 | 0.05175300 |   |            |             |            |   |            |            |            |    |            |            |            |   |            |            |            |
| C                                                                                   | 0.00000000                                                                                                                                                                                                                                                                                                                                                                                                                                                                                                                                                                                                                                                                                                                                                                                                                                                                                                                                                                                                                                                                                                                                                                                                                                                                                                                     | 0.00000000  | -4.32539900 |            |             |   |            |            |             |   |            |             |             |   |            |            |             |   |            |             |             |   |            |            |             |   |            |             |             |   |            |             |             |   |            |            |             |   |            |            |             |   |            |            |            |   |            |             |            |   |            |            |            |    |            |            |            |   |            |            |            |
| O                                                                                   | 0.00000000                                                                                                                                                                                                                                                                                                                                                                                                                                                                                                                                                                                                                                                                                                                                                                                                                                                                                                                                                                                                                                                                                                                                                                                                                                                                                                                     | 1.12516800  | -4.87012300 |            |             |   |            |            |             |   |            |             |             |   |            |            |             |   |            |             |             |   |            |            |             |   |            |             |             |   |            |             |             |   |            |            |             |   |            |            |             |   |            |            |            |   |            |             |            |   |            |            |            |    |            |            |            |   |            |            |            |
| O                                                                                   | 0.00000000                                                                                                                                                                                                                                                                                                                                                                                                                                                                                                                                                                                                                                                                                                                                                                                                                                                                                                                                                                                                                                                                                                                                                                                                                                                                                                                     | -1.12516800 | -4.87012300 |            |             |   |            |            |             |   |            |             |             |   |            |            |             |   |            |             |             |   |            |            |             |   |            |             |             |   |            |             |             |   |            |            |             |   |            |            |             |   |            |            |            |   |            |             |            |   |            |            |            |    |            |            |            |   |            |            |            |
| C                                                                                   | 0.00000000                                                                                                                                                                                                                                                                                                                                                                                                                                                                                                                                                                                                                                                                                                                                                                                                                                                                                                                                                                                                                                                                                                                                                                                                                                                                                                                     | 0.00000000  | -2.78139700 |            |             |   |            |            |             |   |            |             |             |   |            |            |             |   |            |             |             |   |            |            |             |   |            |             |             |   |            |             |             |   |            |            |             |   |            |            |             |   |            |            |            |   |            |             |            |   |            |            |            |    |            |            |            |   |            |            |            |
| C                                                                                   | 0.00000000                                                                                                                                                                                                                                                                                                                                                                                                                                                                                                                                                                                                                                                                                                                                                                                                                                                                                                                                                                                                                                                                                                                                                                                                                                                                                                                     | -1.19010600 | -2.06100700 |            |             |   |            |            |             |   |            |             |             |   |            |            |             |   |            |             |             |   |            |            |             |   |            |             |             |   |            |             |             |   |            |            |             |   |            |            |             |   |            |            |            |   |            |             |            |   |            |            |            |    |            |            |            |   |            |            |            |
| C                                                                                   | 0.00000000                                                                                                                                                                                                                                                                                                                                                                                                                                                                                                                                                                                                                                                                                                                                                                                                                                                                                                                                                                                                                                                                                                                                                                                                                                                                                                                     | 1.19010600  | -2.06100700 |            |             |   |            |            |             |   |            |             |             |   |            |            |             |   |            |             |             |   |            |            |             |   |            |             |             |   |            |             |             |   |            |            |             |   |            |            |             |   |            |            |            |   |            |             |            |   |            |            |            |    |            |            |            |   |            |            |            |
| C                                                                                   | 0.00000000                                                                                                                                                                                                                                                                                                                                                                                                                                                                                                                                                                                                                                                                                                                                                                                                                                                                                                                                                                                                                                                                                                                                                                                                                                                                                                                     | -1.19296400 | -0.66930200 |            |             |   |            |            |             |   |            |             |             |   |            |            |             |   |            |             |             |   |            |            |             |   |            |             |             |   |            |             |             |   |            |            |             |   |            |            |             |   |            |            |            |   |            |             |            |   |            |            |            |    |            |            |            |   |            |            |            |
| H                                                                                   | 0.00000000                                                                                                                                                                                                                                                                                                                                                                                                                                                                                                                                                                                                                                                                                                                                                                                                                                                                                                                                                                                                                                                                                                                                                                                                                                                                                                                     | -2.11483500 | -2.62485300 |            |             |   |            |            |             |   |            |             |             |   |            |            |             |   |            |             |             |   |            |            |             |   |            |             |             |   |            |             |             |   |            |            |             |   |            |            |             |   |            |            |            |   |            |             |            |   |            |            |            |    |            |            |            |   |            |            |            |
| C                                                                                   | 0.00000000                                                                                                                                                                                                                                                                                                                                                                                                                                                                                                                                                                                                                                                                                                                                                                                                                                                                                                                                                                                                                                                                                                                                                                                                                                                                                                                     | 1.19296400  | -0.66930200 |            |             |   |            |            |             |   |            |             |             |   |            |            |             |   |            |             |             |   |            |            |             |   |            |             |             |   |            |             |             |   |            |            |             |   |            |            |             |   |            |            |            |   |            |             |            |   |            |            |            |    |            |            |            |   |            |            |            |
| H                                                                                   | 0.00000000                                                                                                                                                                                                                                                                                                                                                                                                                                                                                                                                                                                                                                                                                                                                                                                                                                                                                                                                                                                                                                                                                                                                                                                                                                                                                                                     | 2.11483500  | -2.62485300 |            |             |   |            |            |             |   |            |             |             |   |            |            |             |   |            |             |             |   |            |            |             |   |            |             |             |   |            |             |             |   |            |            |             |   |            |            |             |   |            |            |            |   |            |             |            |   |            |            |            |    |            |            |            |   |            |            |            |
| C                                                                                   | 0.00000000                                                                                                                                                                                                                                                                                                                                                                                                                                                                                                                                                                                                                                                                                                                                                                                                                                                                                                                                                                                                                                                                                                                                                                                                                                                                                                                     | 0.00000000  | 0.05175300  |            |             |   |            |            |             |   |            |             |             |   |            |            |             |   |            |             |             |   |            |            |             |   |            |             |             |   |            |             |             |   |            |            |             |   |            |            |             |   |            |            |            |   |            |             |            |   |            |            |            |    |            |            |            |   |            |            |            |



|                                                                                     |                                                                                                                                                                                                                                                                                                                                                                                                                                                                                                                                                                                                                                                                                                                                                                                                                                                                                                                                                                                                                                                                                                                                                                                                                                                                                                                                                                                                                                                                                                                                                                                 |                                                         |             |             |             |   |            |             |             |   |            |            |             |   |            |             |             |   |            |             |             |   |             |             |             |   |             |             |             |   |             |             |             |   |             |             |             |   |            |            |             |   |            |            |             |   |            |             |             |   |             |             |             |   |             |             |             |   |             |            |            |    |             |             |            |   |             |             |            |   |             |             |             |    |            |            |            |
|-------------------------------------------------------------------------------------|---------------------------------------------------------------------------------------------------------------------------------------------------------------------------------------------------------------------------------------------------------------------------------------------------------------------------------------------------------------------------------------------------------------------------------------------------------------------------------------------------------------------------------------------------------------------------------------------------------------------------------------------------------------------------------------------------------------------------------------------------------------------------------------------------------------------------------------------------------------------------------------------------------------------------------------------------------------------------------------------------------------------------------------------------------------------------------------------------------------------------------------------------------------------------------------------------------------------------------------------------------------------------------------------------------------------------------------------------------------------------------------------------------------------------------------------------------------------------------------------------------------------------------------------------------------------------------|---------------------------------------------------------|-------------|-------------|-------------|---|------------|-------------|-------------|---|------------|------------|-------------|---|------------|-------------|-------------|---|------------|-------------|-------------|---|-------------|-------------|-------------|---|-------------|-------------|-------------|---|-------------|-------------|-------------|---|-------------|-------------|-------------|---|------------|------------|-------------|---|------------|------------|-------------|---|------------|-------------|-------------|---|-------------|-------------|-------------|---|-------------|-------------|-------------|---|-------------|------------|------------|----|-------------|-------------|------------|---|-------------|-------------|------------|---|-------------|-------------|-------------|----|------------|------------|------------|
|                                                                                     | <table> <tbody> <tr><td>H</td><td>0.00000000</td><td>-2.13505700</td><td>-0.13222600</td></tr> <tr><td>H</td><td>0.00000000</td><td>2.13505700</td><td>-0.13222600</td></tr> <tr><td>I</td><td>0.00000000</td><td>0.00000000</td><td>2.20581500</td></tr> <tr><td>F</td><td>0.00000000</td><td>0.00000000</td><td>4.62465600</td></tr> </tbody> </table>                                                                                                                                                                                                                                                                                                                                                                                                                                                                                                                                                                                                                                                                                                                                                                                                                                                                                                                                                                                                                                                                                                                                                                                                                        | H                                                       | 0.00000000  | -2.13505700 | -0.13222600 | H | 0.00000000 | 2.13505700  | -0.13222600 | I | 0.00000000 | 0.00000000 | 2.20581500  | F | 0.00000000 | 0.00000000  | 4.62465600  |   |            |             |             |   |             |             |             |   |             |             |             |   |             |             |             |   |             |             |             |   |            |            |             |   |            |            |             |   |            |             |             |   |             |             |             |   |             |             |             |   |             |            |            |    |             |             |            |   |             |             |            |   |             |             |             |    |            |            |            |
| H                                                                                   | 0.00000000                                                                                                                                                                                                                                                                                                                                                                                                                                                                                                                                                                                                                                                                                                                                                                                                                                                                                                                                                                                                                                                                                                                                                                                                                                                                                                                                                                                                                                                                                                                                                                      | -2.13505700                                             | -0.13222600 |             |             |   |            |             |             |   |            |            |             |   |            |             |             |   |            |             |             |   |             |             |             |   |             |             |             |   |             |             |             |   |             |             |             |   |            |            |             |   |            |            |             |   |            |             |             |   |             |             |             |   |             |             |             |   |             |            |            |    |             |             |            |   |             |             |            |   |             |             |             |    |            |            |            |
| H                                                                                   | 0.00000000                                                                                                                                                                                                                                                                                                                                                                                                                                                                                                                                                                                                                                                                                                                                                                                                                                                                                                                                                                                                                                                                                                                                                                                                                                                                                                                                                                                                                                                                                                                                                                      | 2.13505700                                              | -0.13222600 |             |             |   |            |             |             |   |            |            |             |   |            |             |             |   |            |             |             |   |             |             |             |   |             |             |             |   |             |             |             |   |             |             |             |   |            |            |             |   |            |            |             |   |            |             |             |   |             |             |             |   |             |             |             |   |             |            |            |    |             |             |            |   |             |             |            |   |             |             |             |    |            |            |            |
| I                                                                                   | 0.00000000                                                                                                                                                                                                                                                                                                                                                                                                                                                                                                                                                                                                                                                                                                                                                                                                                                                                                                                                                                                                                                                                                                                                                                                                                                                                                                                                                                                                                                                                                                                                                                      | 0.00000000                                              | 2.20581500  |             |             |   |            |             |             |   |            |            |             |   |            |             |             |   |            |             |             |   |             |             |             |   |             |             |             |   |             |             |             |   |             |             |             |   |            |            |             |   |            |            |             |   |            |             |             |   |             |             |             |   |             |             |             |   |             |            |            |    |             |             |            |   |             |             |            |   |             |             |             |    |            |            |            |
| F                                                                                   | 0.00000000                                                                                                                                                                                                                                                                                                                                                                                                                                                                                                                                                                                                                                                                                                                                                                                                                                                                                                                                                                                                                                                                                                                                                                                                                                                                                                                                                                                                                                                                                                                                                                      | 0.00000000                                              | 4.62465600  |             |             |   |            |             |             |   |            |            |             |   |            |             |             |   |            |             |             |   |             |             |             |   |             |             |             |   |             |             |             |   |             |             |             |   |            |            |             |   |            |            |             |   |            |             |             |   |             |             |             |   |             |             |             |   |             |            |            |    |             |             |            |   |             |             |            |   |             |             |             |    |            |            |            |
| 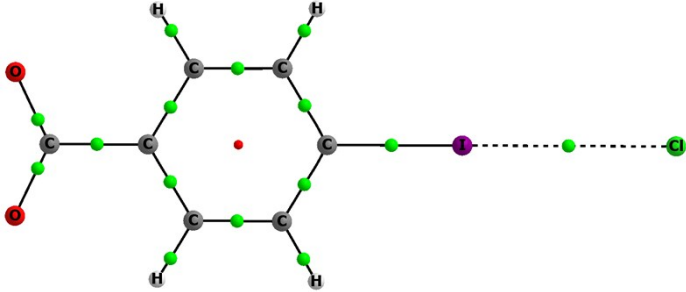   | <table> <tbody> <tr><td colspan="4"><b>1[CO<sub>2</sub><sup>-</sup>,C-I]:Cl<sup>-</sup></b></td></tr> <tr><td>C</td><td>0.00000000</td><td>0.00000000</td><td>-4.69838500</td></tr> <tr><td>O</td><td>0.00000000</td><td>1.12664500</td><td>-5.23698100</td></tr> <tr><td>O</td><td>0.00000000</td><td>-1.12664500</td><td>-5.23698100</td></tr> <tr><td>C</td><td>0.00000000</td><td>0.00000000</td><td>-3.15323200</td></tr> <tr><td>C</td><td>0.00000000</td><td>-1.19177000</td><td>-2.43685500</td></tr> <tr><td>C</td><td>0.00000000</td><td>1.19177000</td><td>-2.43685500</td></tr> <tr><td>C</td><td>0.00000000</td><td>-1.19981900</td><td>-1.04615900</td></tr> <tr><td>H</td><td>0.00000000</td><td>-2.11467000</td><td>-3.00274500</td></tr> <tr><td>C</td><td>0.00000000</td><td>1.19981900</td><td>-1.04615900</td></tr> <tr><td>H</td><td>0.00000000</td><td>2.11467000</td><td>-3.00274500</td></tr> <tr><td>C</td><td>0.00000000</td><td>0.00000000</td><td>-0.34184500</td></tr> <tr><td>H</td><td>0.00000000</td><td>-2.13769700</td><td>-0.50503400</td></tr> <tr><td>H</td><td>0.00000000</td><td>2.13769700</td><td>-0.50503400</td></tr> <tr><td>I</td><td>0.00000000</td><td>0.00000000</td><td>1.78081100</td></tr> <tr><td>Cl</td><td>0.00000000</td><td>0.00000000</td><td>5.14007000</td></tr> </tbody> </table>                                                                                                                                                                                                                                   | <b>1[CO<sub>2</sub><sup>-</sup>,C-I]:Cl<sup>-</sup></b> |             |             |             | C | 0.00000000 | 0.00000000  | -4.69838500 | O | 0.00000000 | 1.12664500 | -5.23698100 | O | 0.00000000 | -1.12664500 | -5.23698100 | C | 0.00000000 | 0.00000000  | -3.15323200 | C | 0.00000000  | -1.19177000 | -2.43685500 | C | 0.00000000  | 1.19177000  | -2.43685500 | C | 0.00000000  | -1.19981900 | -1.04615900 | H | 0.00000000  | -2.11467000 | -3.00274500 | C | 0.00000000 | 1.19981900 | -1.04615900 | H | 0.00000000 | 2.11467000 | -3.00274500 | C | 0.00000000 | 0.00000000  | -0.34184500 | H | 0.00000000  | -2.13769700 | -0.50503400 | H | 0.00000000  | 2.13769700  | -0.50503400 | I | 0.00000000  | 0.00000000 | 1.78081100 | Cl | 0.00000000  | 0.00000000  | 5.14007000 |   |             |             |            |   |             |             |             |    |            |            |            |
| <b>1[CO<sub>2</sub><sup>-</sup>,C-I]:Cl<sup>-</sup></b>                             |                                                                                                                                                                                                                                                                                                                                                                                                                                                                                                                                                                                                                                                                                                                                                                                                                                                                                                                                                                                                                                                                                                                                                                                                                                                                                                                                                                                                                                                                                                                                                                                 |                                                         |             |             |             |   |            |             |             |   |            |            |             |   |            |             |             |   |            |             |             |   |             |             |             |   |             |             |             |   |             |             |             |   |             |             |             |   |            |            |             |   |            |            |             |   |            |             |             |   |             |             |             |   |             |             |             |   |             |            |            |    |             |             |            |   |             |             |            |   |             |             |             |    |            |            |            |
| C                                                                                   | 0.00000000                                                                                                                                                                                                                                                                                                                                                                                                                                                                                                                                                                                                                                                                                                                                                                                                                                                                                                                                                                                                                                                                                                                                                                                                                                                                                                                                                                                                                                                                                                                                                                      | 0.00000000                                              | -4.69838500 |             |             |   |            |             |             |   |            |            |             |   |            |             |             |   |            |             |             |   |             |             |             |   |             |             |             |   |             |             |             |   |             |             |             |   |            |            |             |   |            |            |             |   |            |             |             |   |             |             |             |   |             |             |             |   |             |            |            |    |             |             |            |   |             |             |            |   |             |             |             |    |            |            |            |
| O                                                                                   | 0.00000000                                                                                                                                                                                                                                                                                                                                                                                                                                                                                                                                                                                                                                                                                                                                                                                                                                                                                                                                                                                                                                                                                                                                                                                                                                                                                                                                                                                                                                                                                                                                                                      | 1.12664500                                              | -5.23698100 |             |             |   |            |             |             |   |            |            |             |   |            |             |             |   |            |             |             |   |             |             |             |   |             |             |             |   |             |             |             |   |             |             |             |   |            |            |             |   |            |            |             |   |            |             |             |   |             |             |             |   |             |             |             |   |             |            |            |    |             |             |            |   |             |             |            |   |             |             |             |    |            |            |            |
| O                                                                                   | 0.00000000                                                                                                                                                                                                                                                                                                                                                                                                                                                                                                                                                                                                                                                                                                                                                                                                                                                                                                                                                                                                                                                                                                                                                                                                                                                                                                                                                                                                                                                                                                                                                                      | -1.12664500                                             | -5.23698100 |             |             |   |            |             |             |   |            |            |             |   |            |             |             |   |            |             |             |   |             |             |             |   |             |             |             |   |             |             |             |   |             |             |             |   |            |            |             |   |            |            |             |   |            |             |             |   |             |             |             |   |             |             |             |   |             |            |            |    |             |             |            |   |             |             |            |   |             |             |             |    |            |            |            |
| C                                                                                   | 0.00000000                                                                                                                                                                                                                                                                                                                                                                                                                                                                                                                                                                                                                                                                                                                                                                                                                                                                                                                                                                                                                                                                                                                                                                                                                                                                                                                                                                                                                                                                                                                                                                      | 0.00000000                                              | -3.15323200 |             |             |   |            |             |             |   |            |            |             |   |            |             |             |   |            |             |             |   |             |             |             |   |             |             |             |   |             |             |             |   |             |             |             |   |            |            |             |   |            |            |             |   |            |             |             |   |             |             |             |   |             |             |             |   |             |            |            |    |             |             |            |   |             |             |            |   |             |             |             |    |            |            |            |
| C                                                                                   | 0.00000000                                                                                                                                                                                                                                                                                                                                                                                                                                                                                                                                                                                                                                                                                                                                                                                                                                                                                                                                                                                                                                                                                                                                                                                                                                                                                                                                                                                                                                                                                                                                                                      | -1.19177000                                             | -2.43685500 |             |             |   |            |             |             |   |            |            |             |   |            |             |             |   |            |             |             |   |             |             |             |   |             |             |             |   |             |             |             |   |             |             |             |   |            |            |             |   |            |            |             |   |            |             |             |   |             |             |             |   |             |             |             |   |             |            |            |    |             |             |            |   |             |             |            |   |             |             |             |    |            |            |            |
| C                                                                                   | 0.00000000                                                                                                                                                                                                                                                                                                                                                                                                                                                                                                                                                                                                                                                                                                                                                                                                                                                                                                                                                                                                                                                                                                                                                                                                                                                                                                                                                                                                                                                                                                                                                                      | 1.19177000                                              | -2.43685500 |             |             |   |            |             |             |   |            |            |             |   |            |             |             |   |            |             |             |   |             |             |             |   |             |             |             |   |             |             |             |   |             |             |             |   |            |            |             |   |            |            |             |   |            |             |             |   |             |             |             |   |             |             |             |   |             |            |            |    |             |             |            |   |             |             |            |   |             |             |             |    |            |            |            |
| C                                                                                   | 0.00000000                                                                                                                                                                                                                                                                                                                                                                                                                                                                                                                                                                                                                                                                                                                                                                                                                                                                                                                                                                                                                                                                                                                                                                                                                                                                                                                                                                                                                                                                                                                                                                      | -1.19981900                                             | -1.04615900 |             |             |   |            |             |             |   |            |            |             |   |            |             |             |   |            |             |             |   |             |             |             |   |             |             |             |   |             |             |             |   |             |             |             |   |            |            |             |   |            |            |             |   |            |             |             |   |             |             |             |   |             |             |             |   |             |            |            |    |             |             |            |   |             |             |            |   |             |             |             |    |            |            |            |
| H                                                                                   | 0.00000000                                                                                                                                                                                                                                                                                                                                                                                                                                                                                                                                                                                                                                                                                                                                                                                                                                                                                                                                                                                                                                                                                                                                                                                                                                                                                                                                                                                                                                                                                                                                                                      | -2.11467000                                             | -3.00274500 |             |             |   |            |             |             |   |            |            |             |   |            |             |             |   |            |             |             |   |             |             |             |   |             |             |             |   |             |             |             |   |             |             |             |   |            |            |             |   |            |            |             |   |            |             |             |   |             |             |             |   |             |             |             |   |             |            |            |    |             |             |            |   |             |             |            |   |             |             |             |    |            |            |            |
| C                                                                                   | 0.00000000                                                                                                                                                                                                                                                                                                                                                                                                                                                                                                                                                                                                                                                                                                                                                                                                                                                                                                                                                                                                                                                                                                                                                                                                                                                                                                                                                                                                                                                                                                                                                                      | 1.19981900                                              | -1.04615900 |             |             |   |            |             |             |   |            |            |             |   |            |             |             |   |            |             |             |   |             |             |             |   |             |             |             |   |             |             |             |   |             |             |             |   |            |            |             |   |            |            |             |   |            |             |             |   |             |             |             |   |             |             |             |   |             |            |            |    |             |             |            |   |             |             |            |   |             |             |             |    |            |            |            |
| H                                                                                   | 0.00000000                                                                                                                                                                                                                                                                                                                                                                                                                                                                                                                                                                                                                                                                                                                                                                                                                                                                                                                                                                                                                                                                                                                                                                                                                                                                                                                                                                                                                                                                                                                                                                      | 2.11467000                                              | -3.00274500 |             |             |   |            |             |             |   |            |            |             |   |            |             |             |   |            |             |             |   |             |             |             |   |             |             |             |   |             |             |             |   |             |             |             |   |            |            |             |   |            |            |             |   |            |             |             |   |             |             |             |   |             |             |             |   |             |            |            |    |             |             |            |   |             |             |            |   |             |             |             |    |            |            |            |
| C                                                                                   | 0.00000000                                                                                                                                                                                                                                                                                                                                                                                                                                                                                                                                                                                                                                                                                                                                                                                                                                                                                                                                                                                                                                                                                                                                                                                                                                                                                                                                                                                                                                                                                                                                                                      | 0.00000000                                              | -0.34184500 |             |             |   |            |             |             |   |            |            |             |   |            |             |             |   |            |             |             |   |             |             |             |   |             |             |             |   |             |             |             |   |             |             |             |   |            |            |             |   |            |            |             |   |            |             |             |   |             |             |             |   |             |             |             |   |             |            |            |    |             |             |            |   |             |             |            |   |             |             |             |    |            |            |            |
| H                                                                                   | 0.00000000                                                                                                                                                                                                                                                                                                                                                                                                                                                                                                                                                                                                                                                                                                                                                                                                                                                                                                                                                                                                                                                                                                                                                                                                                                                                                                                                                                                                                                                                                                                                                                      | -2.13769700                                             | -0.50503400 |             |             |   |            |             |             |   |            |            |             |   |            |             |             |   |            |             |             |   |             |             |             |   |             |             |             |   |             |             |             |   |             |             |             |   |            |            |             |   |            |            |             |   |            |             |             |   |             |             |             |   |             |             |             |   |             |            |            |    |             |             |            |   |             |             |            |   |             |             |             |    |            |            |            |
| H                                                                                   | 0.00000000                                                                                                                                                                                                                                                                                                                                                                                                                                                                                                                                                                                                                                                                                                                                                                                                                                                                                                                                                                                                                                                                                                                                                                                                                                                                                                                                                                                                                                                                                                                                                                      | 2.13769700                                              | -0.50503400 |             |             |   |            |             |             |   |            |            |             |   |            |             |             |   |            |             |             |   |             |             |             |   |             |             |             |   |             |             |             |   |             |             |             |   |            |            |             |   |            |            |             |   |            |             |             |   |             |             |             |   |             |             |             |   |             |            |            |    |             |             |            |   |             |             |            |   |             |             |             |    |            |            |            |
| I                                                                                   | 0.00000000                                                                                                                                                                                                                                                                                                                                                                                                                                                                                                                                                                                                                                                                                                                                                                                                                                                                                                                                                                                                                                                                                                                                                                                                                                                                                                                                                                                                                                                                                                                                                                      | 0.00000000                                              | 1.78081100  |             |             |   |            |             |             |   |            |            |             |   |            |             |             |   |            |             |             |   |             |             |             |   |             |             |             |   |             |             |             |   |             |             |             |   |            |            |             |   |            |            |             |   |            |             |             |   |             |             |             |   |             |             |             |   |             |            |            |    |             |             |            |   |             |             |            |   |             |             |             |    |            |            |            |
| Cl                                                                                  | 0.00000000                                                                                                                                                                                                                                                                                                                                                                                                                                                                                                                                                                                                                                                                                                                                                                                                                                                                                                                                                                                                                                                                                                                                                                                                                                                                                                                                                                                                                                                                                                                                                                      | 0.00000000                                              | 5.14007000  |             |             |   |            |             |             |   |            |            |             |   |            |             |             |   |            |             |             |   |             |             |             |   |             |             |             |   |             |             |             |   |             |             |             |   |            |            |             |   |            |            |             |   |            |             |             |   |             |             |             |   |             |             |             |   |             |            |            |    |             |             |            |   |             |             |            |   |             |             |             |    |            |            |            |
|   | <table> <tbody> <tr><td colspan="4"><b>1[CO<sub>2</sub><sup>-</sup>,C-I]:Br<sup>-</sup></b></td></tr> <tr><td>C</td><td>0.00000000</td><td>0.00000000</td><td>-5.37355600</td></tr> <tr><td>O</td><td>0.00000000</td><td>1.12586500</td><td>-5.91172300</td></tr> <tr><td>O</td><td>0.00000000</td><td>-1.12586500</td><td>-5.91172300</td></tr> <tr><td>C</td><td>0.00000000</td><td>0.00000000</td><td>-3.82792700</td></tr> <tr><td>C</td><td>0.00000000</td><td>-1.19186800</td><td>-3.11201200</td></tr> <tr><td>C</td><td>0.00000000</td><td>1.19186800</td><td>-3.11201200</td></tr> <tr><td>C</td><td>0.00000000</td><td>-1.20023900</td><td>-1.72147900</td></tr> <tr><td>H</td><td>0.00000000</td><td>-2.11451900</td><td>-3.67812400</td></tr> <tr><td>C</td><td>0.00000000</td><td>1.20023900</td><td>-1.72147900</td></tr> <tr><td>H</td><td>0.00000000</td><td>2.11451900</td><td>-3.67812400</td></tr> <tr><td>C</td><td>0.00000000</td><td>0.00000000</td><td>-1.02082400</td></tr> <tr><td>H</td><td>0.00000000</td><td>-2.13705400</td><td>-1.17906500</td></tr> <tr><td>H</td><td>0.00000000</td><td>2.13705400</td><td>-1.17906500</td></tr> <tr><td>I</td><td>0.00000000</td><td>0.00000000</td><td>1.09904200</td></tr> <tr><td>Br</td><td>0.00000000</td><td>0.00000000</td><td>4.72538400</td></tr> </tbody> </table>                                                                                                                                                                                                                                   | <b>1[CO<sub>2</sub><sup>-</sup>,C-I]:Br<sup>-</sup></b> |             |             |             | C | 0.00000000 | 0.00000000  | -5.37355600 | O | 0.00000000 | 1.12586500 | -5.91172300 | O | 0.00000000 | -1.12586500 | -5.91172300 | C | 0.00000000 | 0.00000000  | -3.82792700 | C | 0.00000000  | -1.19186800 | -3.11201200 | C | 0.00000000  | 1.19186800  | -3.11201200 | C | 0.00000000  | -1.20023900 | -1.72147900 | H | 0.00000000  | -2.11451900 | -3.67812400 | C | 0.00000000 | 1.20023900 | -1.72147900 | H | 0.00000000 | 2.11451900 | -3.67812400 | C | 0.00000000 | 0.00000000  | -1.02082400 | H | 0.00000000  | -2.13705400 | -1.17906500 | H | 0.00000000  | 2.13705400  | -1.17906500 | I | 0.00000000  | 0.00000000 | 1.09904200 | Br | 0.00000000  | 0.00000000  | 4.72538400 |   |             |             |            |   |             |             |             |    |            |            |            |
| <b>1[CO<sub>2</sub><sup>-</sup>,C-I]:Br<sup>-</sup></b>                             |                                                                                                                                                                                                                                                                                                                                                                                                                                                                                                                                                                                                                                                                                                                                                                                                                                                                                                                                                                                                                                                                                                                                                                                                                                                                                                                                                                                                                                                                                                                                                                                 |                                                         |             |             |             |   |            |             |             |   |            |            |             |   |            |             |             |   |            |             |             |   |             |             |             |   |             |             |             |   |             |             |             |   |             |             |             |   |            |            |             |   |            |            |             |   |            |             |             |   |             |             |             |   |             |             |             |   |             |            |            |    |             |             |            |   |             |             |            |   |             |             |             |    |            |            |            |
| C                                                                                   | 0.00000000                                                                                                                                                                                                                                                                                                                                                                                                                                                                                                                                                                                                                                                                                                                                                                                                                                                                                                                                                                                                                                                                                                                                                                                                                                                                                                                                                                                                                                                                                                                                                                      | 0.00000000                                              | -5.37355600 |             |             |   |            |             |             |   |            |            |             |   |            |             |             |   |            |             |             |   |             |             |             |   |             |             |             |   |             |             |             |   |             |             |             |   |            |            |             |   |            |            |             |   |            |             |             |   |             |             |             |   |             |             |             |   |             |            |            |    |             |             |            |   |             |             |            |   |             |             |             |    |            |            |            |
| O                                                                                   | 0.00000000                                                                                                                                                                                                                                                                                                                                                                                                                                                                                                                                                                                                                                                                                                                                                                                                                                                                                                                                                                                                                                                                                                                                                                                                                                                                                                                                                                                                                                                                                                                                                                      | 1.12586500                                              | -5.91172300 |             |             |   |            |             |             |   |            |            |             |   |            |             |             |   |            |             |             |   |             |             |             |   |             |             |             |   |             |             |             |   |             |             |             |   |            |            |             |   |            |            |             |   |            |             |             |   |             |             |             |   |             |             |             |   |             |            |            |    |             |             |            |   |             |             |            |   |             |             |             |    |            |            |            |
| O                                                                                   | 0.00000000                                                                                                                                                                                                                                                                                                                                                                                                                                                                                                                                                                                                                                                                                                                                                                                                                                                                                                                                                                                                                                                                                                                                                                                                                                                                                                                                                                                                                                                                                                                                                                      | -1.12586500                                             | -5.91172300 |             |             |   |            |             |             |   |            |            |             |   |            |             |             |   |            |             |             |   |             |             |             |   |             |             |             |   |             |             |             |   |             |             |             |   |            |            |             |   |            |            |             |   |            |             |             |   |             |             |             |   |             |             |             |   |             |            |            |    |             |             |            |   |             |             |            |   |             |             |             |    |            |            |            |
| C                                                                                   | 0.00000000                                                                                                                                                                                                                                                                                                                                                                                                                                                                                                                                                                                                                                                                                                                                                                                                                                                                                                                                                                                                                                                                                                                                                                                                                                                                                                                                                                                                                                                                                                                                                                      | 0.00000000                                              | -3.82792700 |             |             |   |            |             |             |   |            |            |             |   |            |             |             |   |            |             |             |   |             |             |             |   |             |             |             |   |             |             |             |   |             |             |             |   |            |            |             |   |            |            |             |   |            |             |             |   |             |             |             |   |             |             |             |   |             |            |            |    |             |             |            |   |             |             |            |   |             |             |             |    |            |            |            |
| C                                                                                   | 0.00000000                                                                                                                                                                                                                                                                                                                                                                                                                                                                                                                                                                                                                                                                                                                                                                                                                                                                                                                                                                                                                                                                                                                                                                                                                                                                                                                                                                                                                                                                                                                                                                      | -1.19186800                                             | -3.11201200 |             |             |   |            |             |             |   |            |            |             |   |            |             |             |   |            |             |             |   |             |             |             |   |             |             |             |   |             |             |             |   |             |             |             |   |            |            |             |   |            |            |             |   |            |             |             |   |             |             |             |   |             |             |             |   |             |            |            |    |             |             |            |   |             |             |            |   |             |             |             |    |            |            |            |
| C                                                                                   | 0.00000000                                                                                                                                                                                                                                                                                                                                                                                                                                                                                                                                                                                                                                                                                                                                                                                                                                                                                                                                                                                                                                                                                                                                                                                                                                                                                                                                                                                                                                                                                                                                                                      | 1.19186800                                              | -3.11201200 |             |             |   |            |             |             |   |            |            |             |   |            |             |             |   |            |             |             |   |             |             |             |   |             |             |             |   |             |             |             |   |             |             |             |   |            |            |             |   |            |            |             |   |            |             |             |   |             |             |             |   |             |             |             |   |             |            |            |    |             |             |            |   |             |             |            |   |             |             |             |    |            |            |            |
| C                                                                                   | 0.00000000                                                                                                                                                                                                                                                                                                                                                                                                                                                                                                                                                                                                                                                                                                                                                                                                                                                                                                                                                                                                                                                                                                                                                                                                                                                                                                                                                                                                                                                                                                                                                                      | -1.20023900                                             | -1.72147900 |             |             |   |            |             |             |   |            |            |             |   |            |             |             |   |            |             |             |   |             |             |             |   |             |             |             |   |             |             |             |   |             |             |             |   |            |            |             |   |            |            |             |   |            |             |             |   |             |             |             |   |             |             |             |   |             |            |            |    |             |             |            |   |             |             |            |   |             |             |             |    |            |            |            |
| H                                                                                   | 0.00000000                                                                                                                                                                                                                                                                                                                                                                                                                                                                                                                                                                                                                                                                                                                                                                                                                                                                                                                                                                                                                                                                                                                                                                                                                                                                                                                                                                                                                                                                                                                                                                      | -2.11451900                                             | -3.67812400 |             |             |   |            |             |             |   |            |            |             |   |            |             |             |   |            |             |             |   |             |             |             |   |             |             |             |   |             |             |             |   |             |             |             |   |            |            |             |   |            |            |             |   |            |             |             |   |             |             |             |   |             |             |             |   |             |            |            |    |             |             |            |   |             |             |            |   |             |             |             |    |            |            |            |
| C                                                                                   | 0.00000000                                                                                                                                                                                                                                                                                                                                                                                                                                                                                                                                                                                                                                                                                                                                                                                                                                                                                                                                                                                                                                                                                                                                                                                                                                                                                                                                                                                                                                                                                                                                                                      | 1.20023900                                              | -1.72147900 |             |             |   |            |             |             |   |            |            |             |   |            |             |             |   |            |             |             |   |             |             |             |   |             |             |             |   |             |             |             |   |             |             |             |   |            |            |             |   |            |            |             |   |            |             |             |   |             |             |             |   |             |             |             |   |             |            |            |    |             |             |            |   |             |             |            |   |             |             |             |    |            |            |            |
| H                                                                                   | 0.00000000                                                                                                                                                                                                                                                                                                                                                                                                                                                                                                                                                                                                                                                                                                                                                                                                                                                                                                                                                                                                                                                                                                                                                                                                                                                                                                                                                                                                                                                                                                                                                                      | 2.11451900                                              | -3.67812400 |             |             |   |            |             |             |   |            |            |             |   |            |             |             |   |            |             |             |   |             |             |             |   |             |             |             |   |             |             |             |   |             |             |             |   |            |            |             |   |            |            |             |   |            |             |             |   |             |             |             |   |             |             |             |   |             |            |            |    |             |             |            |   |             |             |            |   |             |             |             |    |            |            |            |
| C                                                                                   | 0.00000000                                                                                                                                                                                                                                                                                                                                                                                                                                                                                                                                                                                                                                                                                                                                                                                                                                                                                                                                                                                                                                                                                                                                                                                                                                                                                                                                                                                                                                                                                                                                                                      | 0.00000000                                              | -1.02082400 |             |             |   |            |             |             |   |            |            |             |   |            |             |             |   |            |             |             |   |             |             |             |   |             |             |             |   |             |             |             |   |             |             |             |   |            |            |             |   |            |            |             |   |            |             |             |   |             |             |             |   |             |             |             |   |             |            |            |    |             |             |            |   |             |             |            |   |             |             |             |    |            |            |            |
| H                                                                                   | 0.00000000                                                                                                                                                                                                                                                                                                                                                                                                                                                                                                                                                                                                                                                                                                                                                                                                                                                                                                                                                                                                                                                                                                                                                                                                                                                                                                                                                                                                                                                                                                                                                                      | -2.13705400                                             | -1.17906500 |             |             |   |            |             |             |   |            |            |             |   |            |             |             |   |            |             |             |   |             |             |             |   |             |             |             |   |             |             |             |   |             |             |             |   |            |            |             |   |            |            |             |   |            |             |             |   |             |             |             |   |             |             |             |   |             |            |            |    |             |             |            |   |             |             |            |   |             |             |             |    |            |            |            |
| H                                                                                   | 0.00000000                                                                                                                                                                                                                                                                                                                                                                                                                                                                                                                                                                                                                                                                                                                                                                                                                                                                                                                                                                                                                                                                                                                                                                                                                                                                                                                                                                                                                                                                                                                                                                      | 2.13705400                                              | -1.17906500 |             |             |   |            |             |             |   |            |            |             |   |            |             |             |   |            |             |             |   |             |             |             |   |             |             |             |   |             |             |             |   |             |             |             |   |            |            |             |   |            |            |             |   |            |             |             |   |             |             |             |   |             |             |             |   |             |            |            |    |             |             |            |   |             |             |            |   |             |             |             |    |            |            |            |
| I                                                                                   | 0.00000000                                                                                                                                                                                                                                                                                                                                                                                                                                                                                                                                                                                                                                                                                                                                                                                                                                                                                                                                                                                                                                                                                                                                                                                                                                                                                                                                                                                                                                                                                                                                                                      | 0.00000000                                              | 1.09904200  |             |             |   |            |             |             |   |            |            |             |   |            |             |             |   |            |             |             |   |             |             |             |   |             |             |             |   |             |             |             |   |             |             |             |   |            |            |             |   |            |            |             |   |            |             |             |   |             |             |             |   |             |             |             |   |             |            |            |    |             |             |            |   |             |             |            |   |             |             |             |    |            |            |            |
| Br                                                                                  | 0.00000000                                                                                                                                                                                                                                                                                                                                                                                                                                                                                                                                                                                                                                                                                                                                                                                                                                                                                                                                                                                                                                                                                                                                                                                                                                                                                                                                                                                                                                                                                                                                                                      | 0.00000000                                              | 4.72538400  |             |             |   |            |             |             |   |            |            |             |   |            |             |             |   |            |             |             |   |             |             |             |   |             |             |             |   |             |             |             |   |             |             |             |   |            |            |             |   |            |            |             |   |            |             |             |   |             |             |             |   |             |             |             |   |             |            |            |    |             |             |            |   |             |             |            |   |             |             |             |    |            |            |            |
|  | <table> <tbody> <tr><td colspan="4"><b>2[CO<sub>2</sub><sup>-</sup>,C-Br]</b></td></tr> <tr><td>C</td><td>0.61968300</td><td>-0.08785300</td><td>1.11084300</td></tr> <tr><td>C</td><td>0.21161500</td><td>0.91155600</td><td>0.00000000</td></tr> <tr><td>C</td><td>0.61968300</td><td>-0.08785300</td><td>-1.11084300</td></tr> <tr><td>C</td><td>1.01091700</td><td>-1.11091000</td><td>0.00000000</td></tr> <tr><td>C</td><td>-0.83862300</td><td>-0.64369800</td><td>1.10649600</td></tr> <tr><td>C</td><td>-0.45334800</td><td>-1.66772800</td><td>0.00000000</td></tr> <tr><td>C</td><td>-0.83862300</td><td>-0.64369800</td><td>-1.10649600</td></tr> <tr><td>C</td><td>-1.24371900</td><td>0.38426100</td><td>0.00000000</td></tr> <tr><td>H</td><td>1.20922700</td><td>0.16919500</td><td>1.98499300</td></tr> <tr><td>H</td><td>1.20922700</td><td>0.16919500</td><td>-1.98499300</td></tr> <tr><td>H</td><td>1.90068900</td><td>-1.73156200</td><td>0.00000000</td></tr> <tr><td>H</td><td>-1.41576700</td><td>-0.90075100</td><td>1.98772400</td></tr> <tr><td>H</td><td>-1.41576700</td><td>-0.90075100</td><td>-1.98772400</td></tr> <tr><td>H</td><td>-2.12666800</td><td>1.01570600</td><td>0.00000000</td></tr> <tr><td>C</td><td>-0.75544300</td><td>-3.16619700</td><td>0.00000000</td></tr> <tr><td>O</td><td>-0.83862300</td><td>-3.68516700</td><td>1.13085500</td></tr> <tr><td>O</td><td>-0.83862300</td><td>-3.68516700</td><td>-1.13085500</td></tr> <tr><td>Br</td><td>0.68754700</td><td>2.79469600</td><td>0.00000000</td></tr> </tbody> </table> | <b>2[CO<sub>2</sub><sup>-</sup>,C-Br]</b>               |             |             |             | C | 0.61968300 | -0.08785300 | 1.11084300  | C | 0.21161500 | 0.91155600 | 0.00000000  | C | 0.61968300 | -0.08785300 | -1.11084300 | C | 1.01091700 | -1.11091000 | 0.00000000  | C | -0.83862300 | -0.64369800 | 1.10649600  | C | -0.45334800 | -1.66772800 | 0.00000000  | C | -0.83862300 | -0.64369800 | -1.10649600 | C | -1.24371900 | 0.38426100  | 0.00000000  | H | 1.20922700 | 0.16919500 | 1.98499300  | H | 1.20922700 | 0.16919500 | -1.98499300 | H | 1.90068900 | -1.73156200 | 0.00000000  | H | -1.41576700 | -0.90075100 | 1.98772400  | H | -1.41576700 | -0.90075100 | -1.98772400 | H | -2.12666800 | 1.01570600 | 0.00000000 | C  | -0.75544300 | -3.16619700 | 0.00000000 | O | -0.83862300 | -3.68516700 | 1.13085500 | O | -0.83862300 | -3.68516700 | -1.13085500 | Br | 0.68754700 | 2.79469600 | 0.00000000 |
| <b>2[CO<sub>2</sub><sup>-</sup>,C-Br]</b>                                           |                                                                                                                                                                                                                                                                                                                                                                                                                                                                                                                                                                                                                                                                                                                                                                                                                                                                                                                                                                                                                                                                                                                                                                                                                                                                                                                                                                                                                                                                                                                                                                                 |                                                         |             |             |             |   |            |             |             |   |            |            |             |   |            |             |             |   |            |             |             |   |             |             |             |   |             |             |             |   |             |             |             |   |             |             |             |   |            |            |             |   |            |            |             |   |            |             |             |   |             |             |             |   |             |             |             |   |             |            |            |    |             |             |            |   |             |             |            |   |             |             |             |    |            |            |            |
| C                                                                                   | 0.61968300                                                                                                                                                                                                                                                                                                                                                                                                                                                                                                                                                                                                                                                                                                                                                                                                                                                                                                                                                                                                                                                                                                                                                                                                                                                                                                                                                                                                                                                                                                                                                                      | -0.08785300                                             | 1.11084300  |             |             |   |            |             |             |   |            |            |             |   |            |             |             |   |            |             |             |   |             |             |             |   |             |             |             |   |             |             |             |   |             |             |             |   |            |            |             |   |            |            |             |   |            |             |             |   |             |             |             |   |             |             |             |   |             |            |            |    |             |             |            |   |             |             |            |   |             |             |             |    |            |            |            |
| C                                                                                   | 0.21161500                                                                                                                                                                                                                                                                                                                                                                                                                                                                                                                                                                                                                                                                                                                                                                                                                                                                                                                                                                                                                                                                                                                                                                                                                                                                                                                                                                                                                                                                                                                                                                      | 0.91155600                                              | 0.00000000  |             |             |   |            |             |             |   |            |            |             |   |            |             |             |   |            |             |             |   |             |             |             |   |             |             |             |   |             |             |             |   |             |             |             |   |            |            |             |   |            |            |             |   |            |             |             |   |             |             |             |   |             |             |             |   |             |            |            |    |             |             |            |   |             |             |            |   |             |             |             |    |            |            |            |
| C                                                                                   | 0.61968300                                                                                                                                                                                                                                                                                                                                                                                                                                                                                                                                                                                                                                                                                                                                                                                                                                                                                                                                                                                                                                                                                                                                                                                                                                                                                                                                                                                                                                                                                                                                                                      | -0.08785300                                             | -1.11084300 |             |             |   |            |             |             |   |            |            |             |   |            |             |             |   |            |             |             |   |             |             |             |   |             |             |             |   |             |             |             |   |             |             |             |   |            |            |             |   |            |            |             |   |            |             |             |   |             |             |             |   |             |             |             |   |             |            |            |    |             |             |            |   |             |             |            |   |             |             |             |    |            |            |            |
| C                                                                                   | 1.01091700                                                                                                                                                                                                                                                                                                                                                                                                                                                                                                                                                                                                                                                                                                                                                                                                                                                                                                                                                                                                                                                                                                                                                                                                                                                                                                                                                                                                                                                                                                                                                                      | -1.11091000                                             | 0.00000000  |             |             |   |            |             |             |   |            |            |             |   |            |             |             |   |            |             |             |   |             |             |             |   |             |             |             |   |             |             |             |   |             |             |             |   |            |            |             |   |            |            |             |   |            |             |             |   |             |             |             |   |             |             |             |   |             |            |            |    |             |             |            |   |             |             |            |   |             |             |             |    |            |            |            |
| C                                                                                   | -0.83862300                                                                                                                                                                                                                                                                                                                                                                                                                                                                                                                                                                                                                                                                                                                                                                                                                                                                                                                                                                                                                                                                                                                                                                                                                                                                                                                                                                                                                                                                                                                                                                     | -0.64369800                                             | 1.10649600  |             |             |   |            |             |             |   |            |            |             |   |            |             |             |   |            |             |             |   |             |             |             |   |             |             |             |   |             |             |             |   |             |             |             |   |            |            |             |   |            |            |             |   |            |             |             |   |             |             |             |   |             |             |             |   |             |            |            |    |             |             |            |   |             |             |            |   |             |             |             |    |            |            |            |
| C                                                                                   | -0.45334800                                                                                                                                                                                                                                                                                                                                                                                                                                                                                                                                                                                                                                                                                                                                                                                                                                                                                                                                                                                                                                                                                                                                                                                                                                                                                                                                                                                                                                                                                                                                                                     | -1.66772800                                             | 0.00000000  |             |             |   |            |             |             |   |            |            |             |   |            |             |             |   |            |             |             |   |             |             |             |   |             |             |             |   |             |             |             |   |             |             |             |   |            |            |             |   |            |            |             |   |            |             |             |   |             |             |             |   |             |             |             |   |             |            |            |    |             |             |            |   |             |             |            |   |             |             |             |    |            |            |            |
| C                                                                                   | -0.83862300                                                                                                                                                                                                                                                                                                                                                                                                                                                                                                                                                                                                                                                                                                                                                                                                                                                                                                                                                                                                                                                                                                                                                                                                                                                                                                                                                                                                                                                                                                                                                                     | -0.64369800                                             | -1.10649600 |             |             |   |            |             |             |   |            |            |             |   |            |             |             |   |            |             |             |   |             |             |             |   |             |             |             |   |             |             |             |   |             |             |             |   |            |            |             |   |            |            |             |   |            |             |             |   |             |             |             |   |             |             |             |   |             |            |            |    |             |             |            |   |             |             |            |   |             |             |             |    |            |            |            |
| C                                                                                   | -1.24371900                                                                                                                                                                                                                                                                                                                                                                                                                                                                                                                                                                                                                                                                                                                                                                                                                                                                                                                                                                                                                                                                                                                                                                                                                                                                                                                                                                                                                                                                                                                                                                     | 0.38426100                                              | 0.00000000  |             |             |   |            |             |             |   |            |            |             |   |            |             |             |   |            |             |             |   |             |             |             |   |             |             |             |   |             |             |             |   |             |             |             |   |            |            |             |   |            |            |             |   |            |             |             |   |             |             |             |   |             |             |             |   |             |            |            |    |             |             |            |   |             |             |            |   |             |             |             |    |            |            |            |
| H                                                                                   | 1.20922700                                                                                                                                                                                                                                                                                                                                                                                                                                                                                                                                                                                                                                                                                                                                                                                                                                                                                                                                                                                                                                                                                                                                                                                                                                                                                                                                                                                                                                                                                                                                                                      | 0.16919500                                              | 1.98499300  |             |             |   |            |             |             |   |            |            |             |   |            |             |             |   |            |             |             |   |             |             |             |   |             |             |             |   |             |             |             |   |             |             |             |   |            |            |             |   |            |            |             |   |            |             |             |   |             |             |             |   |             |             |             |   |             |            |            |    |             |             |            |   |             |             |            |   |             |             |             |    |            |            |            |
| H                                                                                   | 1.20922700                                                                                                                                                                                                                                                                                                                                                                                                                                                                                                                                                                                                                                                                                                                                                                                                                                                                                                                                                                                                                                                                                                                                                                                                                                                                                                                                                                                                                                                                                                                                                                      | 0.16919500                                              | -1.98499300 |             |             |   |            |             |             |   |            |            |             |   |            |             |             |   |            |             |             |   |             |             |             |   |             |             |             |   |             |             |             |   |             |             |             |   |            |            |             |   |            |            |             |   |            |             |             |   |             |             |             |   |             |             |             |   |             |            |            |    |             |             |            |   |             |             |            |   |             |             |             |    |            |            |            |
| H                                                                                   | 1.90068900                                                                                                                                                                                                                                                                                                                                                                                                                                                                                                                                                                                                                                                                                                                                                                                                                                                                                                                                                                                                                                                                                                                                                                                                                                                                                                                                                                                                                                                                                                                                                                      | -1.73156200                                             | 0.00000000  |             |             |   |            |             |             |   |            |            |             |   |            |             |             |   |            |             |             |   |             |             |             |   |             |             |             |   |             |             |             |   |             |             |             |   |            |            |             |   |            |            |             |   |            |             |             |   |             |             |             |   |             |             |             |   |             |            |            |    |             |             |            |   |             |             |            |   |             |             |             |    |            |            |            |
| H                                                                                   | -1.41576700                                                                                                                                                                                                                                                                                                                                                                                                                                                                                                                                                                                                                                                                                                                                                                                                                                                                                                                                                                                                                                                                                                                                                                                                                                                                                                                                                                                                                                                                                                                                                                     | -0.90075100                                             | 1.98772400  |             |             |   |            |             |             |   |            |            |             |   |            |             |             |   |            |             |             |   |             |             |             |   |             |             |             |   |             |             |             |   |             |             |             |   |            |            |             |   |            |            |             |   |            |             |             |   |             |             |             |   |             |             |             |   |             |            |            |    |             |             |            |   |             |             |            |   |             |             |             |    |            |            |            |
| H                                                                                   | -1.41576700                                                                                                                                                                                                                                                                                                                                                                                                                                                                                                                                                                                                                                                                                                                                                                                                                                                                                                                                                                                                                                                                                                                                                                                                                                                                                                                                                                                                                                                                                                                                                                     | -0.90075100                                             | -1.98772400 |             |             |   |            |             |             |   |            |            |             |   |            |             |             |   |            |             |             |   |             |             |             |   |             |             |             |   |             |             |             |   |             |             |             |   |            |            |             |   |            |            |             |   |            |             |             |   |             |             |             |   |             |             |             |   |             |            |            |    |             |             |            |   |             |             |            |   |             |             |             |    |            |            |            |
| H                                                                                   | -2.12666800                                                                                                                                                                                                                                                                                                                                                                                                                                                                                                                                                                                                                                                                                                                                                                                                                                                                                                                                                                                                                                                                                                                                                                                                                                                                                                                                                                                                                                                                                                                                                                     | 1.01570600                                              | 0.00000000  |             |             |   |            |             |             |   |            |            |             |   |            |             |             |   |            |             |             |   |             |             |             |   |             |             |             |   |             |             |             |   |             |             |             |   |            |            |             |   |            |            |             |   |            |             |             |   |             |             |             |   |             |             |             |   |             |            |            |    |             |             |            |   |             |             |            |   |             |             |             |    |            |            |            |
| C                                                                                   | -0.75544300                                                                                                                                                                                                                                                                                                                                                                                                                                                                                                                                                                                                                                                                                                                                                                                                                                                                                                                                                                                                                                                                                                                                                                                                                                                                                                                                                                                                                                                                                                                                                                     | -3.16619700                                             | 0.00000000  |             |             |   |            |             |             |   |            |            |             |   |            |             |             |   |            |             |             |   |             |             |             |   |             |             |             |   |             |             |             |   |             |             |             |   |            |            |             |   |            |            |             |   |            |             |             |   |             |             |             |   |             |             |             |   |             |            |            |    |             |             |            |   |             |             |            |   |             |             |             |    |            |            |            |
| O                                                                                   | -0.83862300                                                                                                                                                                                                                                                                                                                                                                                                                                                                                                                                                                                                                                                                                                                                                                                                                                                                                                                                                                                                                                                                                                                                                                                                                                                                                                                                                                                                                                                                                                                                                                     | -3.68516700                                             | 1.13085500  |             |             |   |            |             |             |   |            |            |             |   |            |             |             |   |            |             |             |   |             |             |             |   |             |             |             |   |             |             |             |   |             |             |             |   |            |            |             |   |            |            |             |   |            |             |             |   |             |             |             |   |             |             |             |   |             |            |            |    |             |             |            |   |             |             |            |   |             |             |             |    |            |            |            |
| O                                                                                   | -0.83862300                                                                                                                                                                                                                                                                                                                                                                                                                                                                                                                                                                                                                                                                                                                                                                                                                                                                                                                                                                                                                                                                                                                                                                                                                                                                                                                                                                                                                                                                                                                                                                     | -3.68516700                                             | -1.13085500 |             |             |   |            |             |             |   |            |            |             |   |            |             |             |   |            |             |             |   |             |             |             |   |             |             |             |   |             |             |             |   |             |             |             |   |            |            |             |   |            |            |             |   |            |             |             |   |             |             |             |   |             |             |             |   |             |            |            |    |             |             |            |   |             |             |            |   |             |             |             |    |            |            |            |
| Br                                                                                  | 0.68754700                                                                                                                                                                                                                                                                                                                                                                                                                                                                                                                                                                                                                                                                                                                                                                                                                                                                                                                                                                                                                                                                                                                                                                                                                                                                                                                                                                                                                                                                                                                                                                      | 2.79469600                                              | 0.00000000  |             |             |   |            |             |             |   |            |            |             |   |            |             |             |   |            |             |             |   |             |             |             |   |             |             |             |   |             |             |             |   |             |             |             |   |            |            |             |   |            |            |             |   |            |             |             |   |             |             |             |   |             |             |             |   |             |            |            |    |             |             |            |   |             |             |            |   |             |             |             |    |            |            |            |

|                                                                                     |                                                                                                                                                                                                                                                                                                                                                                                                                                                                                                                                                                                                                                                                                                                                                                                                                                                                                                                                                                                                                                                                                                                                                                                                                                                                                                                                                                                                                                                                                                                                                                                                                                                                   |             |             |             |            |   |            |            |            |   |            |             |             |   |            |             |            |   |             |             |            |   |             |             |            |   |             |             |             |   |             |             |            |   |            |             |            |   |            |             |             |   |            |             |            |   |             |             |            |   |             |             |             |   |             |            |            |   |             |             |            |   |             |             |            |   |             |             |             |    |             |             |             |   |            |            |            |
|-------------------------------------------------------------------------------------|-------------------------------------------------------------------------------------------------------------------------------------------------------------------------------------------------------------------------------------------------------------------------------------------------------------------------------------------------------------------------------------------------------------------------------------------------------------------------------------------------------------------------------------------------------------------------------------------------------------------------------------------------------------------------------------------------------------------------------------------------------------------------------------------------------------------------------------------------------------------------------------------------------------------------------------------------------------------------------------------------------------------------------------------------------------------------------------------------------------------------------------------------------------------------------------------------------------------------------------------------------------------------------------------------------------------------------------------------------------------------------------------------------------------------------------------------------------------------------------------------------------------------------------------------------------------------------------------------------------------------------------------------------------------|-------------|-------------|-------------|------------|---|------------|------------|------------|---|------------|-------------|-------------|---|------------|-------------|------------|---|-------------|-------------|------------|---|-------------|-------------|------------|---|-------------|-------------|-------------|---|-------------|-------------|------------|---|------------|-------------|------------|---|------------|-------------|-------------|---|------------|-------------|------------|---|-------------|-------------|------------|---|-------------|-------------|-------------|---|-------------|------------|------------|---|-------------|-------------|------------|---|-------------|-------------|------------|---|-------------|-------------|-------------|----|-------------|-------------|-------------|---|------------|------------|------------|
| 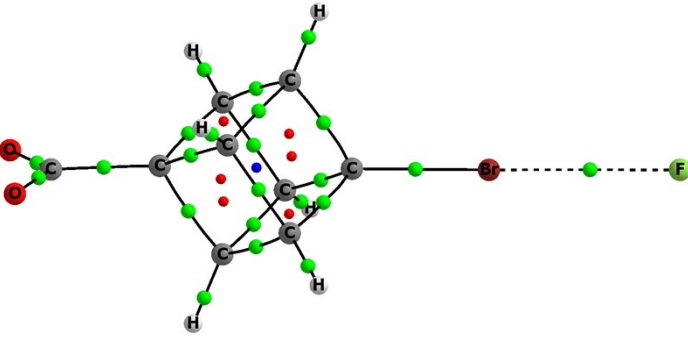   | <p><b>2[CO<sub>2</sub><sup>-</sup>,C-Br]:F<sup>-</sup></b></p> <table border="1"> <tbody> <tr><td>C</td><td>0.52357800</td><td>-0.48936900</td><td>1.10571500</td></tr> <tr><td>C</td><td>0.11953300</td><td>0.53226200</td><td>0.00000000</td></tr> <tr><td>C</td><td>0.52357800</td><td>-0.48936900</td><td>-1.10571500</td></tr> <tr><td>C</td><td>0.92068100</td><td>-1.51410100</td><td>0.00000000</td></tr> <tr><td>C</td><td>-0.92908800</td><td>-1.05680000</td><td>1.10511400</td></tr> <tr><td>C</td><td>-0.54133600</td><td>-2.08352100</td><td>0.00000000</td></tr> <tr><td>C</td><td>-0.92908800</td><td>-1.05680000</td><td>-1.10511400</td></tr> <tr><td>C</td><td>-1.33357900</td><td>-0.02906200</td><td>0.00000000</td></tr> <tr><td>H</td><td>1.11253400</td><td>-0.23064200</td><td>1.98138300</td></tr> <tr><td>H</td><td>1.11253400</td><td>-0.23064200</td><td>-1.98138300</td></tr> <tr><td>H</td><td>1.81141900</td><td>-2.13640500</td><td>0.00000000</td></tr> <tr><td>H</td><td>-1.50628400</td><td>-1.32079800</td><td>1.98611600</td></tr> <tr><td>H</td><td>-1.50628400</td><td>-1.32079800</td><td>-1.98611600</td></tr> <tr><td>H</td><td>-2.22179800</td><td>0.59740000</td><td>0.00000000</td></tr> <tr><td>C</td><td>-0.84118100</td><td>-3.58107700</td><td>0.00000000</td></tr> <tr><td>O</td><td>-0.92908800</td><td>-4.11559900</td><td>1.12781200</td></tr> <tr><td>O</td><td>-0.92908800</td><td>-4.11559900</td><td>-1.12781200</td></tr> <tr><td>Br</td><td>0.57825800</td><td>2.40008700</td><td>0.00000000</td></tr> <tr><td>F</td><td>1.19396400</td><td>5.01060800</td><td>0.00000000</td></tr> </tbody> </table> | C           | 0.52357800  | -0.48936900 | 1.10571500 | C | 0.11953300 | 0.53226200 | 0.00000000 | C | 0.52357800 | -0.48936900 | -1.10571500 | C | 0.92068100 | -1.51410100 | 0.00000000 | C | -0.92908800 | -1.05680000 | 1.10511400 | C | -0.54133600 | -2.08352100 | 0.00000000 | C | -0.92908800 | -1.05680000 | -1.10511400 | C | -1.33357900 | -0.02906200 | 0.00000000 | H | 1.11253400 | -0.23064200 | 1.98138300 | H | 1.11253400 | -0.23064200 | -1.98138300 | H | 1.81141900 | -2.13640500 | 0.00000000 | H | -1.50628400 | -1.32079800 | 1.98611600 | H | -1.50628400 | -1.32079800 | -1.98611600 | H | -2.22179800 | 0.59740000 | 0.00000000 | C | -0.84118100 | -3.58107700 | 0.00000000 | O | -0.92908800 | -4.11559900 | 1.12781200 | O | -0.92908800 | -4.11559900 | -1.12781200 | Br | 0.57825800  | 2.40008700  | 0.00000000  | F | 1.19396400 | 5.01060800 | 0.00000000 |
| C                                                                                   | 0.52357800                                                                                                                                                                                                                                                                                                                                                                                                                                                                                                                                                                                                                                                                                                                                                                                                                                                                                                                                                                                                                                                                                                                                                                                                                                                                                                                                                                                                                                                                                                                                                                                                                                                        | -0.48936900 | 1.10571500  |             |            |   |            |            |            |   |            |             |             |   |            |             |            |   |             |             |            |   |             |             |            |   |             |             |             |   |             |             |            |   |            |             |            |   |            |             |             |   |            |             |            |   |             |             |            |   |             |             |             |   |             |            |            |   |             |             |            |   |             |             |            |   |             |             |             |    |             |             |             |   |            |            |            |
| C                                                                                   | 0.11953300                                                                                                                                                                                                                                                                                                                                                                                                                                                                                                                                                                                                                                                                                                                                                                                                                                                                                                                                                                                                                                                                                                                                                                                                                                                                                                                                                                                                                                                                                                                                                                                                                                                        | 0.53226200  | 0.00000000  |             |            |   |            |            |            |   |            |             |             |   |            |             |            |   |             |             |            |   |             |             |            |   |             |             |             |   |             |             |            |   |            |             |            |   |            |             |             |   |            |             |            |   |             |             |            |   |             |             |             |   |             |            |            |   |             |             |            |   |             |             |            |   |             |             |             |    |             |             |             |   |            |            |            |
| C                                                                                   | 0.52357800                                                                                                                                                                                                                                                                                                                                                                                                                                                                                                                                                                                                                                                                                                                                                                                                                                                                                                                                                                                                                                                                                                                                                                                                                                                                                                                                                                                                                                                                                                                                                                                                                                                        | -0.48936900 | -1.10571500 |             |            |   |            |            |            |   |            |             |             |   |            |             |            |   |             |             |            |   |             |             |            |   |             |             |             |   |             |             |            |   |            |             |            |   |            |             |             |   |            |             |            |   |             |             |            |   |             |             |             |   |             |            |            |   |             |             |            |   |             |             |            |   |             |             |             |    |             |             |             |   |            |            |            |
| C                                                                                   | 0.92068100                                                                                                                                                                                                                                                                                                                                                                                                                                                                                                                                                                                                                                                                                                                                                                                                                                                                                                                                                                                                                                                                                                                                                                                                                                                                                                                                                                                                                                                                                                                                                                                                                                                        | -1.51410100 | 0.00000000  |             |            |   |            |            |            |   |            |             |             |   |            |             |            |   |             |             |            |   |             |             |            |   |             |             |             |   |             |             |            |   |            |             |            |   |            |             |             |   |            |             |            |   |             |             |            |   |             |             |             |   |             |            |            |   |             |             |            |   |             |             |            |   |             |             |             |    |             |             |             |   |            |            |            |
| C                                                                                   | -0.92908800                                                                                                                                                                                                                                                                                                                                                                                                                                                                                                                                                                                                                                                                                                                                                                                                                                                                                                                                                                                                                                                                                                                                                                                                                                                                                                                                                                                                                                                                                                                                                                                                                                                       | -1.05680000 | 1.10511400  |             |            |   |            |            |            |   |            |             |             |   |            |             |            |   |             |             |            |   |             |             |            |   |             |             |             |   |             |             |            |   |            |             |            |   |            |             |             |   |            |             |            |   |             |             |            |   |             |             |             |   |             |            |            |   |             |             |            |   |             |             |            |   |             |             |             |    |             |             |             |   |            |            |            |
| C                                                                                   | -0.54133600                                                                                                                                                                                                                                                                                                                                                                                                                                                                                                                                                                                                                                                                                                                                                                                                                                                                                                                                                                                                                                                                                                                                                                                                                                                                                                                                                                                                                                                                                                                                                                                                                                                       | -2.08352100 | 0.00000000  |             |            |   |            |            |            |   |            |             |             |   |            |             |            |   |             |             |            |   |             |             |            |   |             |             |             |   |             |             |            |   |            |             |            |   |            |             |             |   |            |             |            |   |             |             |            |   |             |             |             |   |             |            |            |   |             |             |            |   |             |             |            |   |             |             |             |    |             |             |             |   |            |            |            |
| C                                                                                   | -0.92908800                                                                                                                                                                                                                                                                                                                                                                                                                                                                                                                                                                                                                                                                                                                                                                                                                                                                                                                                                                                                                                                                                                                                                                                                                                                                                                                                                                                                                                                                                                                                                                                                                                                       | -1.05680000 | -1.10511400 |             |            |   |            |            |            |   |            |             |             |   |            |             |            |   |             |             |            |   |             |             |            |   |             |             |             |   |             |             |            |   |            |             |            |   |            |             |             |   |            |             |            |   |             |             |            |   |             |             |             |   |             |            |            |   |             |             |            |   |             |             |            |   |             |             |             |    |             |             |             |   |            |            |            |
| C                                                                                   | -1.33357900                                                                                                                                                                                                                                                                                                                                                                                                                                                                                                                                                                                                                                                                                                                                                                                                                                                                                                                                                                                                                                                                                                                                                                                                                                                                                                                                                                                                                                                                                                                                                                                                                                                       | -0.02906200 | 0.00000000  |             |            |   |            |            |            |   |            |             |             |   |            |             |            |   |             |             |            |   |             |             |            |   |             |             |             |   |             |             |            |   |            |             |            |   |            |             |             |   |            |             |            |   |             |             |            |   |             |             |             |   |             |            |            |   |             |             |            |   |             |             |            |   |             |             |             |    |             |             |             |   |            |            |            |
| H                                                                                   | 1.11253400                                                                                                                                                                                                                                                                                                                                                                                                                                                                                                                                                                                                                                                                                                                                                                                                                                                                                                                                                                                                                                                                                                                                                                                                                                                                                                                                                                                                                                                                                                                                                                                                                                                        | -0.23064200 | 1.98138300  |             |            |   |            |            |            |   |            |             |             |   |            |             |            |   |             |             |            |   |             |             |            |   |             |             |             |   |             |             |            |   |            |             |            |   |            |             |             |   |            |             |            |   |             |             |            |   |             |             |             |   |             |            |            |   |             |             |            |   |             |             |            |   |             |             |             |    |             |             |             |   |            |            |            |
| H                                                                                   | 1.11253400                                                                                                                                                                                                                                                                                                                                                                                                                                                                                                                                                                                                                                                                                                                                                                                                                                                                                                                                                                                                                                                                                                                                                                                                                                                                                                                                                                                                                                                                                                                                                                                                                                                        | -0.23064200 | -1.98138300 |             |            |   |            |            |            |   |            |             |             |   |            |             |            |   |             |             |            |   |             |             |            |   |             |             |             |   |             |             |            |   |            |             |            |   |            |             |             |   |            |             |            |   |             |             |            |   |             |             |             |   |             |            |            |   |             |             |            |   |             |             |            |   |             |             |             |    |             |             |             |   |            |            |            |
| H                                                                                   | 1.81141900                                                                                                                                                                                                                                                                                                                                                                                                                                                                                                                                                                                                                                                                                                                                                                                                                                                                                                                                                                                                                                                                                                                                                                                                                                                                                                                                                                                                                                                                                                                                                                                                                                                        | -2.13640500 | 0.00000000  |             |            |   |            |            |            |   |            |             |             |   |            |             |            |   |             |             |            |   |             |             |            |   |             |             |             |   |             |             |            |   |            |             |            |   |            |             |             |   |            |             |            |   |             |             |            |   |             |             |             |   |             |            |            |   |             |             |            |   |             |             |            |   |             |             |             |    |             |             |             |   |            |            |            |
| H                                                                                   | -1.50628400                                                                                                                                                                                                                                                                                                                                                                                                                                                                                                                                                                                                                                                                                                                                                                                                                                                                                                                                                                                                                                                                                                                                                                                                                                                                                                                                                                                                                                                                                                                                                                                                                                                       | -1.32079800 | 1.98611600  |             |            |   |            |            |            |   |            |             |             |   |            |             |            |   |             |             |            |   |             |             |            |   |             |             |             |   |             |             |            |   |            |             |            |   |            |             |             |   |            |             |            |   |             |             |            |   |             |             |             |   |             |            |            |   |             |             |            |   |             |             |            |   |             |             |             |    |             |             |             |   |            |            |            |
| H                                                                                   | -1.50628400                                                                                                                                                                                                                                                                                                                                                                                                                                                                                                                                                                                                                                                                                                                                                                                                                                                                                                                                                                                                                                                                                                                                                                                                                                                                                                                                                                                                                                                                                                                                                                                                                                                       | -1.32079800 | -1.98611600 |             |            |   |            |            |            |   |            |             |             |   |            |             |            |   |             |             |            |   |             |             |            |   |             |             |             |   |             |             |            |   |            |             |            |   |            |             |             |   |            |             |            |   |             |             |            |   |             |             |             |   |             |            |            |   |             |             |            |   |             |             |            |   |             |             |             |    |             |             |             |   |            |            |            |
| H                                                                                   | -2.22179800                                                                                                                                                                                                                                                                                                                                                                                                                                                                                                                                                                                                                                                                                                                                                                                                                                                                                                                                                                                                                                                                                                                                                                                                                                                                                                                                                                                                                                                                                                                                                                                                                                                       | 0.59740000  | 0.00000000  |             |            |   |            |            |            |   |            |             |             |   |            |             |            |   |             |             |            |   |             |             |            |   |             |             |             |   |             |             |            |   |            |             |            |   |            |             |             |   |            |             |            |   |             |             |            |   |             |             |             |   |             |            |            |   |             |             |            |   |             |             |            |   |             |             |             |    |             |             |             |   |            |            |            |
| C                                                                                   | -0.84118100                                                                                                                                                                                                                                                                                                                                                                                                                                                                                                                                                                                                                                                                                                                                                                                                                                                                                                                                                                                                                                                                                                                                                                                                                                                                                                                                                                                                                                                                                                                                                                                                                                                       | -3.58107700 | 0.00000000  |             |            |   |            |            |            |   |            |             |             |   |            |             |            |   |             |             |            |   |             |             |            |   |             |             |             |   |             |             |            |   |            |             |            |   |            |             |             |   |            |             |            |   |             |             |            |   |             |             |             |   |             |            |            |   |             |             |            |   |             |             |            |   |             |             |             |    |             |             |             |   |            |            |            |
| O                                                                                   | -0.92908800                                                                                                                                                                                                                                                                                                                                                                                                                                                                                                                                                                                                                                                                                                                                                                                                                                                                                                                                                                                                                                                                                                                                                                                                                                                                                                                                                                                                                                                                                                                                                                                                                                                       | -4.11559900 | 1.12781200  |             |            |   |            |            |            |   |            |             |             |   |            |             |            |   |             |             |            |   |             |             |            |   |             |             |             |   |             |             |            |   |            |             |            |   |            |             |             |   |            |             |            |   |             |             |            |   |             |             |             |   |             |            |            |   |             |             |            |   |             |             |            |   |             |             |             |    |             |             |             |   |            |            |            |
| O                                                                                   | -0.92908800                                                                                                                                                                                                                                                                                                                                                                                                                                                                                                                                                                                                                                                                                                                                                                                                                                                                                                                                                                                                                                                                                                                                                                                                                                                                                                                                                                                                                                                                                                                                                                                                                                                       | -4.11559900 | -1.12781200 |             |            |   |            |            |            |   |            |             |             |   |            |             |            |   |             |             |            |   |             |             |            |   |             |             |             |   |             |             |            |   |            |             |            |   |            |             |             |   |            |             |            |   |             |             |            |   |             |             |             |   |             |            |            |   |             |             |            |   |             |             |            |   |             |             |             |    |             |             |             |   |            |            |            |
| Br                                                                                  | 0.57825800                                                                                                                                                                                                                                                                                                                                                                                                                                                                                                                                                                                                                                                                                                                                                                                                                                                                                                                                                                                                                                                                                                                                                                                                                                                                                                                                                                                                                                                                                                                                                                                                                                                        | 2.40008700  | 0.00000000  |             |            |   |            |            |            |   |            |             |             |   |            |             |            |   |             |             |            |   |             |             |            |   |             |             |             |   |             |             |            |   |            |             |            |   |            |             |             |   |            |             |            |   |             |             |            |   |             |             |             |   |             |            |            |   |             |             |            |   |             |             |            |   |             |             |             |    |             |             |             |   |            |            |            |
| F                                                                                   | 1.19396400                                                                                                                                                                                                                                                                                                                                                                                                                                                                                                                                                                                                                                                                                                                                                                                                                                                                                                                                                                                                                                                                                                                                                                                                                                                                                                                                                                                                                                                                                                                                                                                                                                                        | 5.01060800  | 0.00000000  |             |            |   |            |            |            |   |            |             |             |   |            |             |            |   |             |             |            |   |             |             |            |   |             |             |             |   |             |             |            |   |            |             |            |   |            |             |             |   |            |             |            |   |             |             |            |   |             |             |             |   |             |            |            |   |             |             |            |   |             |             |            |   |             |             |             |    |             |             |             |   |            |            |            |
|   | <p><b>2[CO<sub>2</sub><sup>-</sup>,C-I]</b></p> <table border="1"> <tbody> <tr><td>C</td><td>0.50838900</td><td>-0.56256000</td><td>1.11182500</td></tr> <tr><td>C</td><td>0.09939300</td><td>0.43749900</td><td>0.00000000</td></tr> <tr><td>C</td><td>0.50838900</td><td>-0.56256000</td><td>-1.11182500</td></tr> <tr><td>C</td><td>0.90004000</td><td>-1.58372400</td><td>0.00000000</td></tr> <tr><td>C</td><td>-0.94997200</td><td>-1.11720000</td><td>1.10682400</td></tr> <tr><td>C</td><td>-0.56420100</td><td>-2.14075200</td><td>0.00000000</td></tr> <tr><td>C</td><td>-0.94997200</td><td>-1.11720000</td><td>-1.10682400</td></tr> <tr><td>C</td><td>-1.35655900</td><td>-0.09119600</td><td>0.00000000</td></tr> <tr><td>H</td><td>1.09774400</td><td>-0.31183200</td><td>1.98779600</td></tr> <tr><td>H</td><td>1.09774400</td><td>-0.31183200</td><td>-1.98779600</td></tr> <tr><td>H</td><td>1.79080500</td><td>-2.20304500</td><td>0.00000000</td></tr> <tr><td>H</td><td>-1.52705200</td><td>-1.37330000</td><td>1.98841500</td></tr> <tr><td>H</td><td>-1.52705200</td><td>-1.37330000</td><td>-1.98841500</td></tr> <tr><td>H</td><td>-2.24317600</td><td>0.53501200</td><td>0.00000000</td></tr> <tr><td>C</td><td>-0.86668900</td><td>-3.63978600</td><td>0.00000000</td></tr> <tr><td>O</td><td>-0.94997200</td><td>-4.15789500</td><td>1.13094000</td></tr> <tr><td>O</td><td>-0.94997200</td><td>-4.15789500</td><td>-1.13094000</td></tr> <tr><td>I</td><td>0.61391700</td><td>2.52508500</td><td>0.00000000</td></tr> </tbody> </table>                                                                                              | C           | 0.50838900  | -0.56256000 | 1.11182500 | C | 0.09939300 | 0.43749900 | 0.00000000 | C | 0.50838900 | -0.56256000 | -1.11182500 | C | 0.90004000 | -1.58372400 | 0.00000000 | C | -0.94997200 | -1.11720000 | 1.10682400 | C | -0.56420100 | -2.14075200 | 0.00000000 | C | -0.94997200 | -1.11720000 | -1.10682400 | C | -1.35655900 | -0.09119600 | 0.00000000 | H | 1.09774400 | -0.31183200 | 1.98779600 | H | 1.09774400 | -0.31183200 | -1.98779600 | H | 1.79080500 | -2.20304500 | 0.00000000 | H | -1.52705200 | -1.37330000 | 1.98841500 | H | -1.52705200 | -1.37330000 | -1.98841500 | H | -2.24317600 | 0.53501200 | 0.00000000 | C | -0.86668900 | -3.63978600 | 0.00000000 | O | -0.94997200 | -4.15789500 | 1.13094000 | O | -0.94997200 | -4.15789500 | -1.13094000 | I  | 0.61391700  | 2.52508500  | 0.00000000  |   |            |            |            |
| C                                                                                   | 0.50838900                                                                                                                                                                                                                                                                                                                                                                                                                                                                                                                                                                                                                                                                                                                                                                                                                                                                                                                                                                                                                                                                                                                                                                                                                                                                                                                                                                                                                                                                                                                                                                                                                                                        | -0.56256000 | 1.11182500  |             |            |   |            |            |            |   |            |             |             |   |            |             |            |   |             |             |            |   |             |             |            |   |             |             |             |   |             |             |            |   |            |             |            |   |            |             |             |   |            |             |            |   |             |             |            |   |             |             |             |   |             |            |            |   |             |             |            |   |             |             |            |   |             |             |             |    |             |             |             |   |            |            |            |
| C                                                                                   | 0.09939300                                                                                                                                                                                                                                                                                                                                                                                                                                                                                                                                                                                                                                                                                                                                                                                                                                                                                                                                                                                                                                                                                                                                                                                                                                                                                                                                                                                                                                                                                                                                                                                                                                                        | 0.43749900  | 0.00000000  |             |            |   |            |            |            |   |            |             |             |   |            |             |            |   |             |             |            |   |             |             |            |   |             |             |             |   |             |             |            |   |            |             |            |   |            |             |             |   |            |             |            |   |             |             |            |   |             |             |             |   |             |            |            |   |             |             |            |   |             |             |            |   |             |             |             |    |             |             |             |   |            |            |            |
| C                                                                                   | 0.50838900                                                                                                                                                                                                                                                                                                                                                                                                                                                                                                                                                                                                                                                                                                                                                                                                                                                                                                                                                                                                                                                                                                                                                                                                                                                                                                                                                                                                                                                                                                                                                                                                                                                        | -0.56256000 | -1.11182500 |             |            |   |            |            |            |   |            |             |             |   |            |             |            |   |             |             |            |   |             |             |            |   |             |             |             |   |             |             |            |   |            |             |            |   |            |             |             |   |            |             |            |   |             |             |            |   |             |             |             |   |             |            |            |   |             |             |            |   |             |             |            |   |             |             |             |    |             |             |             |   |            |            |            |
| C                                                                                   | 0.90004000                                                                                                                                                                                                                                                                                                                                                                                                                                                                                                                                                                                                                                                                                                                                                                                                                                                                                                                                                                                                                                                                                                                                                                                                                                                                                                                                                                                                                                                                                                                                                                                                                                                        | -1.58372400 | 0.00000000  |             |            |   |            |            |            |   |            |             |             |   |            |             |            |   |             |             |            |   |             |             |            |   |             |             |             |   |             |             |            |   |            |             |            |   |            |             |             |   |            |             |            |   |             |             |            |   |             |             |             |   |             |            |            |   |             |             |            |   |             |             |            |   |             |             |             |    |             |             |             |   |            |            |            |
| C                                                                                   | -0.94997200                                                                                                                                                                                                                                                                                                                                                                                                                                                                                                                                                                                                                                                                                                                                                                                                                                                                                                                                                                                                                                                                                                                                                                                                                                                                                                                                                                                                                                                                                                                                                                                                                                                       | -1.11720000 | 1.10682400  |             |            |   |            |            |            |   |            |             |             |   |            |             |            |   |             |             |            |   |             |             |            |   |             |             |             |   |             |             |            |   |            |             |            |   |            |             |             |   |            |             |            |   |             |             |            |   |             |             |             |   |             |            |            |   |             |             |            |   |             |             |            |   |             |             |             |    |             |             |             |   |            |            |            |
| C                                                                                   | -0.56420100                                                                                                                                                                                                                                                                                                                                                                                                                                                                                                                                                                                                                                                                                                                                                                                                                                                                                                                                                                                                                                                                                                                                                                                                                                                                                                                                                                                                                                                                                                                                                                                                                                                       | -2.14075200 | 0.00000000  |             |            |   |            |            |            |   |            |             |             |   |            |             |            |   |             |             |            |   |             |             |            |   |             |             |             |   |             |             |            |   |            |             |            |   |            |             |             |   |            |             |            |   |             |             |            |   |             |             |             |   |             |            |            |   |             |             |            |   |             |             |            |   |             |             |             |    |             |             |             |   |            |            |            |
| C                                                                                   | -0.94997200                                                                                                                                                                                                                                                                                                                                                                                                                                                                                                                                                                                                                                                                                                                                                                                                                                                                                                                                                                                                                                                                                                                                                                                                                                                                                                                                                                                                                                                                                                                                                                                                                                                       | -1.11720000 | -1.10682400 |             |            |   |            |            |            |   |            |             |             |   |            |             |            |   |             |             |            |   |             |             |            |   |             |             |             |   |             |             |            |   |            |             |            |   |            |             |             |   |            |             |            |   |             |             |            |   |             |             |             |   |             |            |            |   |             |             |            |   |             |             |            |   |             |             |             |    |             |             |             |   |            |            |            |
| C                                                                                   | -1.35655900                                                                                                                                                                                                                                                                                                                                                                                                                                                                                                                                                                                                                                                                                                                                                                                                                                                                                                                                                                                                                                                                                                                                                                                                                                                                                                                                                                                                                                                                                                                                                                                                                                                       | -0.09119600 | 0.00000000  |             |            |   |            |            |            |   |            |             |             |   |            |             |            |   |             |             |            |   |             |             |            |   |             |             |             |   |             |             |            |   |            |             |            |   |            |             |             |   |            |             |            |   |             |             |            |   |             |             |             |   |             |            |            |   |             |             |            |   |             |             |            |   |             |             |             |    |             |             |             |   |            |            |            |
| H                                                                                   | 1.09774400                                                                                                                                                                                                                                                                                                                                                                                                                                                                                                                                                                                                                                                                                                                                                                                                                                                                                                                                                                                                                                                                                                                                                                                                                                                                                                                                                                                                                                                                                                                                                                                                                                                        | -0.31183200 | 1.98779600  |             |            |   |            |            |            |   |            |             |             |   |            |             |            |   |             |             |            |   |             |             |            |   |             |             |             |   |             |             |            |   |            |             |            |   |            |             |             |   |            |             |            |   |             |             |            |   |             |             |             |   |             |            |            |   |             |             |            |   |             |             |            |   |             |             |             |    |             |             |             |   |            |            |            |
| H                                                                                   | 1.09774400                                                                                                                                                                                                                                                                                                                                                                                                                                                                                                                                                                                                                                                                                                                                                                                                                                                                                                                                                                                                                                                                                                                                                                                                                                                                                                                                                                                                                                                                                                                                                                                                                                                        | -0.31183200 | -1.98779600 |             |            |   |            |            |            |   |            |             |             |   |            |             |            |   |             |             |            |   |             |             |            |   |             |             |             |   |             |             |            |   |            |             |            |   |            |             |             |   |            |             |            |   |             |             |            |   |             |             |             |   |             |            |            |   |             |             |            |   |             |             |            |   |             |             |             |    |             |             |             |   |            |            |            |
| H                                                                                   | 1.79080500                                                                                                                                                                                                                                                                                                                                                                                                                                                                                                                                                                                                                                                                                                                                                                                                                                                                                                                                                                                                                                                                                                                                                                                                                                                                                                                                                                                                                                                                                                                                                                                                                                                        | -2.20304500 | 0.00000000  |             |            |   |            |            |            |   |            |             |             |   |            |             |            |   |             |             |            |   |             |             |            |   |             |             |             |   |             |             |            |   |            |             |            |   |            |             |             |   |            |             |            |   |             |             |            |   |             |             |             |   |             |            |            |   |             |             |            |   |             |             |            |   |             |             |             |    |             |             |             |   |            |            |            |
| H                                                                                   | -1.52705200                                                                                                                                                                                                                                                                                                                                                                                                                                                                                                                                                                                                                                                                                                                                                                                                                                                                                                                                                                                                                                                                                                                                                                                                                                                                                                                                                                                                                                                                                                                                                                                                                                                       | -1.37330000 | 1.98841500  |             |            |   |            |            |            |   |            |             |             |   |            |             |            |   |             |             |            |   |             |             |            |   |             |             |             |   |             |             |            |   |            |             |            |   |            |             |             |   |            |             |            |   |             |             |            |   |             |             |             |   |             |            |            |   |             |             |            |   |             |             |            |   |             |             |             |    |             |             |             |   |            |            |            |
| H                                                                                   | -1.52705200                                                                                                                                                                                                                                                                                                                                                                                                                                                                                                                                                                                                                                                                                                                                                                                                                                                                                                                                                                                                                                                                                                                                                                                                                                                                                                                                                                                                                                                                                                                                                                                                                                                       | -1.37330000 | -1.98841500 |             |            |   |            |            |            |   |            |             |             |   |            |             |            |   |             |             |            |   |             |             |            |   |             |             |             |   |             |             |            |   |            |             |            |   |            |             |             |   |            |             |            |   |             |             |            |   |             |             |             |   |             |            |            |   |             |             |            |   |             |             |            |   |             |             |             |    |             |             |             |   |            |            |            |
| H                                                                                   | -2.24317600                                                                                                                                                                                                                                                                                                                                                                                                                                                                                                                                                                                                                                                                                                                                                                                                                                                                                                                                                                                                                                                                                                                                                                                                                                                                                                                                                                                                                                                                                                                                                                                                                                                       | 0.53501200  | 0.00000000  |             |            |   |            |            |            |   |            |             |             |   |            |             |            |   |             |             |            |   |             |             |            |   |             |             |             |   |             |             |            |   |            |             |            |   |            |             |             |   |            |             |            |   |             |             |            |   |             |             |             |   |             |            |            |   |             |             |            |   |             |             |            |   |             |             |             |    |             |             |             |   |            |            |            |
| C                                                                                   | -0.86668900                                                                                                                                                                                                                                                                                                                                                                                                                                                                                                                                                                                                                                                                                                                                                                                                                                                                                                                                                                                                                                                                                                                                                                                                                                                                                                                                                                                                                                                                                                                                                                                                                                                       | -3.63978600 | 0.00000000  |             |            |   |            |            |            |   |            |             |             |   |            |             |            |   |             |             |            |   |             |             |            |   |             |             |             |   |             |             |            |   |            |             |            |   |            |             |             |   |            |             |            |   |             |             |            |   |             |             |             |   |             |            |            |   |             |             |            |   |             |             |            |   |             |             |             |    |             |             |             |   |            |            |            |
| O                                                                                   | -0.94997200                                                                                                                                                                                                                                                                                                                                                                                                                                                                                                                                                                                                                                                                                                                                                                                                                                                                                                                                                                                                                                                                                                                                                                                                                                                                                                                                                                                                                                                                                                                                                                                                                                                       | -4.15789500 | 1.13094000  |             |            |   |            |            |            |   |            |             |             |   |            |             |            |   |             |             |            |   |             |             |            |   |             |             |             |   |             |             |            |   |            |             |            |   |            |             |             |   |            |             |            |   |             |             |            |   |             |             |             |   |             |            |            |   |             |             |            |   |             |             |            |   |             |             |             |    |             |             |             |   |            |            |            |
| O                                                                                   | -0.94997200                                                                                                                                                                                                                                                                                                                                                                                                                                                                                                                                                                                                                                                                                                                                                                                                                                                                                                                                                                                                                                                                                                                                                                                                                                                                                                                                                                                                                                                                                                                                                                                                                                                       | -4.15789500 | -1.13094000 |             |            |   |            |            |            |   |            |             |             |   |            |             |            |   |             |             |            |   |             |             |            |   |             |             |             |   |             |             |            |   |            |             |            |   |            |             |             |   |            |             |            |   |             |             |            |   |             |             |             |   |             |            |            |   |             |             |            |   |             |             |            |   |             |             |             |    |             |             |             |   |            |            |            |
| I                                                                                   | 0.61391700                                                                                                                                                                                                                                                                                                                                                                                                                                                                                                                                                                                                                                                                                                                                                                                                                                                                                                                                                                                                                                                                                                                                                                                                                                                                                                                                                                                                                                                                                                                                                                                                                                                        | 2.52508500  | 0.00000000  |             |            |   |            |            |            |   |            |             |             |   |            |             |            |   |             |             |            |   |             |             |            |   |             |             |             |   |             |             |            |   |            |             |            |   |            |             |             |   |            |             |            |   |             |             |            |   |             |             |             |   |             |            |            |   |             |             |            |   |             |             |            |   |             |             |             |    |             |             |             |   |            |            |            |
|  | <p><b>2[CO<sub>2</sub><sup>-</sup>,C-I]:F<sup>-</sup></b></p> <table border="1"> <tbody> <tr><td>C</td><td>0.42064600</td><td>-0.89336900</td><td>1.10434500</td></tr> <tr><td>C</td><td>0.01967500</td><td>0.13740000</td><td>0.00000000</td></tr> <tr><td>C</td><td>0.42064600</td><td>-0.89336900</td><td>-1.10434500</td></tr> <tr><td>C</td><td>0.81861700</td><td>-1.91812700</td><td>0.00000000</td></tr> <tr><td>C</td><td>-1.03125500</td><td>-1.46093300</td><td>1.10518000</td></tr> <tr><td>C</td><td>-0.64360500</td><td>-2.48788200</td><td>0.00000000</td></tr> <tr><td>C</td><td>-1.03125500</td><td>-1.46093300</td><td>-1.10518000</td></tr> <tr><td>C</td><td>-1.43420100</td><td>-0.43378900</td><td>0.00000000</td></tr> <tr><td>H</td><td>1.00993600</td><td>-0.64333300</td><td>1.98361200</td></tr> <tr><td>H</td><td>1.00993600</td><td>-0.64333300</td><td>-1.98361200</td></tr> <tr><td>H</td><td>1.70834500</td><td>-2.54308300</td><td>0.00000000</td></tr> <tr><td>H</td><td>-1.60892400</td><td>-1.72756800</td><td>1.98588400</td></tr> <tr><td>H</td><td>-1.60892400</td><td>-1.72756800</td><td>-1.98588400</td></tr> <tr><td>H</td><td>-2.32878600</td><td>0.18556700</td><td>0.00000000</td></tr> <tr><td>I</td><td>0.53611400</td><td>2.22912400</td><td>0.00000000</td></tr> <tr><td>C</td><td>-0.94304500</td><td>-3.98539900</td><td>0.00000000</td></tr> <tr><td>O</td><td>-1.03125500</td><td>-4.52188700</td><td>1.12744900</td></tr> <tr><td>O</td><td>-1.03125500</td><td>-4.52188700</td><td>-1.12744900</td></tr> <tr><td>F</td><td>1.14746000</td><td>4.63159500</td><td>0.00000000</td></tr> </tbody> </table>   | C           | 0.42064600  | -0.89336900 | 1.10434500 | C | 0.01967500 | 0.13740000 | 0.00000000 | C | 0.42064600 | -0.89336900 | -1.10434500 | C | 0.81861700 | -1.91812700 | 0.00000000 | C | -1.03125500 | -1.46093300 | 1.10518000 | C | -0.64360500 | -2.48788200 | 0.00000000 | C | -1.03125500 | -1.46093300 | -1.10518000 | C | -1.43420100 | -0.43378900 | 0.00000000 | H | 1.00993600 | -0.64333300 | 1.98361200 | H | 1.00993600 | -0.64333300 | -1.98361200 | H | 1.70834500 | -2.54308300 | 0.00000000 | H | -1.60892400 | -1.72756800 | 1.98588400 | H | -1.60892400 | -1.72756800 | -1.98588400 | H | -2.32878600 | 0.18556700 | 0.00000000 | I | 0.53611400  | 2.22912400  | 0.00000000 | C | -0.94304500 | -3.98539900 | 0.00000000 | O | -1.03125500 | -4.52188700 | 1.12744900  | O  | -1.03125500 | -4.52188700 | -1.12744900 | F | 1.14746000 | 4.63159500 | 0.00000000 |
| C                                                                                   | 0.42064600                                                                                                                                                                                                                                                                                                                                                                                                                                                                                                                                                                                                                                                                                                                                                                                                                                                                                                                                                                                                                                                                                                                                                                                                                                                                                                                                                                                                                                                                                                                                                                                                                                                        | -0.89336900 | 1.10434500  |             |            |   |            |            |            |   |            |             |             |   |            |             |            |   |             |             |            |   |             |             |            |   |             |             |             |   |             |             |            |   |            |             |            |   |            |             |             |   |            |             |            |   |             |             |            |   |             |             |             |   |             |            |            |   |             |             |            |   |             |             |            |   |             |             |             |    |             |             |             |   |            |            |            |
| C                                                                                   | 0.01967500                                                                                                                                                                                                                                                                                                                                                                                                                                                                                                                                                                                                                                                                                                                                                                                                                                                                                                                                                                                                                                                                                                                                                                                                                                                                                                                                                                                                                                                                                                                                                                                                                                                        | 0.13740000  | 0.00000000  |             |            |   |            |            |            |   |            |             |             |   |            |             |            |   |             |             |            |   |             |             |            |   |             |             |             |   |             |             |            |   |            |             |            |   |            |             |             |   |            |             |            |   |             |             |            |   |             |             |             |   |             |            |            |   |             |             |            |   |             |             |            |   |             |             |             |    |             |             |             |   |            |            |            |
| C                                                                                   | 0.42064600                                                                                                                                                                                                                                                                                                                                                                                                                                                                                                                                                                                                                                                                                                                                                                                                                                                                                                                                                                                                                                                                                                                                                                                                                                                                                                                                                                                                                                                                                                                                                                                                                                                        | -0.89336900 | -1.10434500 |             |            |   |            |            |            |   |            |             |             |   |            |             |            |   |             |             |            |   |             |             |            |   |             |             |             |   |             |             |            |   |            |             |            |   |            |             |             |   |            |             |            |   |             |             |            |   |             |             |             |   |             |            |            |   |             |             |            |   |             |             |            |   |             |             |             |    |             |             |             |   |            |            |            |
| C                                                                                   | 0.81861700                                                                                                                                                                                                                                                                                                                                                                                                                                                                                                                                                                                                                                                                                                                                                                                                                                                                                                                                                                                                                                                                                                                                                                                                                                                                                                                                                                                                                                                                                                                                                                                                                                                        | -1.91812700 | 0.00000000  |             |            |   |            |            |            |   |            |             |             |   |            |             |            |   |             |             |            |   |             |             |            |   |             |             |             |   |             |             |            |   |            |             |            |   |            |             |             |   |            |             |            |   |             |             |            |   |             |             |             |   |             |            |            |   |             |             |            |   |             |             |            |   |             |             |             |    |             |             |             |   |            |            |            |
| C                                                                                   | -1.03125500                                                                                                                                                                                                                                                                                                                                                                                                                                                                                                                                                                                                                                                                                                                                                                                                                                                                                                                                                                                                                                                                                                                                                                                                                                                                                                                                                                                                                                                                                                                                                                                                                                                       | -1.46093300 | 1.10518000  |             |            |   |            |            |            |   |            |             |             |   |            |             |            |   |             |             |            |   |             |             |            |   |             |             |             |   |             |             |            |   |            |             |            |   |            |             |             |   |            |             |            |   |             |             |            |   |             |             |             |   |             |            |            |   |             |             |            |   |             |             |            |   |             |             |             |    |             |             |             |   |            |            |            |
| C                                                                                   | -0.64360500                                                                                                                                                                                                                                                                                                                                                                                                                                                                                                                                                                                                                                                                                                                                                                                                                                                                                                                                                                                                                                                                                                                                                                                                                                                                                                                                                                                                                                                                                                                                                                                                                                                       | -2.48788200 | 0.00000000  |             |            |   |            |            |            |   |            |             |             |   |            |             |            |   |             |             |            |   |             |             |            |   |             |             |             |   |             |             |            |   |            |             |            |   |            |             |             |   |            |             |            |   |             |             |            |   |             |             |             |   |             |            |            |   |             |             |            |   |             |             |            |   |             |             |             |    |             |             |             |   |            |            |            |
| C                                                                                   | -1.03125500                                                                                                                                                                                                                                                                                                                                                                                                                                                                                                                                                                                                                                                                                                                                                                                                                                                                                                                                                                                                                                                                                                                                                                                                                                                                                                                                                                                                                                                                                                                                                                                                                                                       | -1.46093300 | -1.10518000 |             |            |   |            |            |            |   |            |             |             |   |            |             |            |   |             |             |            |   |             |             |            |   |             |             |             |   |             |             |            |   |            |             |            |   |            |             |             |   |            |             |            |   |             |             |            |   |             |             |             |   |             |            |            |   |             |             |            |   |             |             |            |   |             |             |             |    |             |             |             |   |            |            |            |
| C                                                                                   | -1.43420100                                                                                                                                                                                                                                                                                                                                                                                                                                                                                                                                                                                                                                                                                                                                                                                                                                                                                                                                                                                                                                                                                                                                                                                                                                                                                                                                                                                                                                                                                                                                                                                                                                                       | -0.43378900 | 0.00000000  |             |            |   |            |            |            |   |            |             |             |   |            |             |            |   |             |             |            |   |             |             |            |   |             |             |             |   |             |             |            |   |            |             |            |   |            |             |             |   |            |             |            |   |             |             |            |   |             |             |             |   |             |            |            |   |             |             |            |   |             |             |            |   |             |             |             |    |             |             |             |   |            |            |            |
| H                                                                                   | 1.00993600                                                                                                                                                                                                                                                                                                                                                                                                                                                                                                                                                                                                                                                                                                                                                                                                                                                                                                                                                                                                                                                                                                                                                                                                                                                                                                                                                                                                                                                                                                                                                                                                                                                        | -0.64333300 | 1.98361200  |             |            |   |            |            |            |   |            |             |             |   |            |             |            |   |             |             |            |   |             |             |            |   |             |             |             |   |             |             |            |   |            |             |            |   |            |             |             |   |            |             |            |   |             |             |            |   |             |             |             |   |             |            |            |   |             |             |            |   |             |             |            |   |             |             |             |    |             |             |             |   |            |            |            |
| H                                                                                   | 1.00993600                                                                                                                                                                                                                                                                                                                                                                                                                                                                                                                                                                                                                                                                                                                                                                                                                                                                                                                                                                                                                                                                                                                                                                                                                                                                                                                                                                                                                                                                                                                                                                                                                                                        | -0.64333300 | -1.98361200 |             |            |   |            |            |            |   |            |             |             |   |            |             |            |   |             |             |            |   |             |             |            |   |             |             |             |   |             |             |            |   |            |             |            |   |            |             |             |   |            |             |            |   |             |             |            |   |             |             |             |   |             |            |            |   |             |             |            |   |             |             |            |   |             |             |             |    |             |             |             |   |            |            |            |
| H                                                                                   | 1.70834500                                                                                                                                                                                                                                                                                                                                                                                                                                                                                                                                                                                                                                                                                                                                                                                                                                                                                                                                                                                                                                                                                                                                                                                                                                                                                                                                                                                                                                                                                                                                                                                                                                                        | -2.54308300 | 0.00000000  |             |            |   |            |            |            |   |            |             |             |   |            |             |            |   |             |             |            |   |             |             |            |   |             |             |             |   |             |             |            |   |            |             |            |   |            |             |             |   |            |             |            |   |             |             |            |   |             |             |             |   |             |            |            |   |             |             |            |   |             |             |            |   |             |             |             |    |             |             |             |   |            |            |            |
| H                                                                                   | -1.60892400                                                                                                                                                                                                                                                                                                                                                                                                                                                                                                                                                                                                                                                                                                                                                                                                                                                                                                                                                                                                                                                                                                                                                                                                                                                                                                                                                                                                                                                                                                                                                                                                                                                       | -1.72756800 | 1.98588400  |             |            |   |            |            |            |   |            |             |             |   |            |             |            |   |             |             |            |   |             |             |            |   |             |             |             |   |             |             |            |   |            |             |            |   |            |             |             |   |            |             |            |   |             |             |            |   |             |             |             |   |             |            |            |   |             |             |            |   |             |             |            |   |             |             |             |    |             |             |             |   |            |            |            |
| H                                                                                   | -1.60892400                                                                                                                                                                                                                                                                                                                                                                                                                                                                                                                                                                                                                                                                                                                                                                                                                                                                                                                                                                                                                                                                                                                                                                                                                                                                                                                                                                                                                                                                                                                                                                                                                                                       | -1.72756800 | -1.98588400 |             |            |   |            |            |            |   |            |             |             |   |            |             |            |   |             |             |            |   |             |             |            |   |             |             |             |   |             |             |            |   |            |             |            |   |            |             |             |   |            |             |            |   |             |             |            |   |             |             |             |   |             |            |            |   |             |             |            |   |             |             |            |   |             |             |             |    |             |             |             |   |            |            |            |
| H                                                                                   | -2.32878600                                                                                                                                                                                                                                                                                                                                                                                                                                                                                                                                                                                                                                                                                                                                                                                                                                                                                                                                                                                                                                                                                                                                                                                                                                                                                                                                                                                                                                                                                                                                                                                                                                                       | 0.18556700  | 0.00000000  |             |            |   |            |            |            |   |            |             |             |   |            |             |            |   |             |             |            |   |             |             |            |   |             |             |             |   |             |             |            |   |            |             |            |   |            |             |             |   |            |             |            |   |             |             |            |   |             |             |             |   |             |            |            |   |             |             |            |   |             |             |            |   |             |             |             |    |             |             |             |   |            |            |            |
| I                                                                                   | 0.53611400                                                                                                                                                                                                                                                                                                                                                                                                                                                                                                                                                                                                                                                                                                                                                                                                                                                                                                                                                                                                                                                                                                                                                                                                                                                                                                                                                                                                                                                                                                                                                                                                                                                        | 2.22912400  | 0.00000000  |             |            |   |            |            |            |   |            |             |             |   |            |             |            |   |             |             |            |   |             |             |            |   |             |             |             |   |             |             |            |   |            |             |            |   |            |             |             |   |            |             |            |   |             |             |            |   |             |             |             |   |             |            |            |   |             |             |            |   |             |             |            |   |             |             |             |    |             |             |             |   |            |            |            |
| C                                                                                   | -0.94304500                                                                                                                                                                                                                                                                                                                                                                                                                                                                                                                                                                                                                                                                                                                                                                                                                                                                                                                                                                                                                                                                                                                                                                                                                                                                                                                                                                                                                                                                                                                                                                                                                                                       | -3.98539900 | 0.00000000  |             |            |   |            |            |            |   |            |             |             |   |            |             |            |   |             |             |            |   |             |             |            |   |             |             |             |   |             |             |            |   |            |             |            |   |            |             |             |   |            |             |            |   |             |             |            |   |             |             |             |   |             |            |            |   |             |             |            |   |             |             |            |   |             |             |             |    |             |             |             |   |            |            |            |
| O                                                                                   | -1.03125500                                                                                                                                                                                                                                                                                                                                                                                                                                                                                                                                                                                                                                                                                                                                                                                                                                                                                                                                                                                                                                                                                                                                                                                                                                                                                                                                                                                                                                                                                                                                                                                                                                                       | -4.52188700 | 1.12744900  |             |            |   |            |            |            |   |            |             |             |   |            |             |            |   |             |             |            |   |             |             |            |   |             |             |             |   |             |             |            |   |            |             |            |   |            |             |             |   |            |             |            |   |             |             |            |   |             |             |             |   |             |            |            |   |             |             |            |   |             |             |            |   |             |             |             |    |             |             |             |   |            |            |            |
| O                                                                                   | -1.03125500                                                                                                                                                                                                                                                                                                                                                                                                                                                                                                                                                                                                                                                                                                                                                                                                                                                                                                                                                                                                                                                                                                                                                                                                                                                                                                                                                                                                                                                                                                                                                                                                                                                       | -4.52188700 | -1.12744900 |             |            |   |            |            |            |   |            |             |             |   |            |             |            |   |             |             |            |   |             |             |            |   |             |             |             |   |             |             |            |   |            |             |            |   |            |             |             |   |            |             |            |   |             |             |            |   |             |             |             |   |             |            |            |   |             |             |            |   |             |             |            |   |             |             |             |    |             |             |             |   |            |            |            |
| F                                                                                   | 1.14746000                                                                                                                                                                                                                                                                                                                                                                                                                                                                                                                                                                                                                                                                                                                                                                                                                                                                                                                                                                                                                                                                                                                                                                                                                                                                                                                                                                                                                                                                                                                                                                                                                                                        | 4.63159500  | 0.00000000  |             |            |   |            |            |            |   |            |             |             |   |            |             |            |   |             |             |            |   |             |             |            |   |             |             |             |   |             |             |            |   |            |             |            |   |            |             |             |   |            |             |            |   |             |             |            |   |             |             |             |   |             |            |            |   |             |             |            |   |             |             |            |   |             |             |             |    |             |             |             |   |            |            |            |

|                                                                                     |                                                                                                                                                                                                                                                                                                                                                                                                                                                                                                                                                                                                                                                                                                                                                                                                                                                                                                                                                                                                                                                                                                                                                                                                                                                                                                                                                                                                                                                                                                                                                                                                                                                                         |             |             |            |             |   |             |             |             |   |             |             |             |   |             |             |             |   |             |             |             |   |             |             |             |   |             |             |             |   |             |             |             |   |             |            |             |   |             |             |            |   |             |             |             |   |             |             |             |   |             |             |            |   |             |             |             |   |             |            |             |   |             |            |             |   |             |             |             |   |             |             |             |    |            |            |             |
|-------------------------------------------------------------------------------------|-------------------------------------------------------------------------------------------------------------------------------------------------------------------------------------------------------------------------------------------------------------------------------------------------------------------------------------------------------------------------------------------------------------------------------------------------------------------------------------------------------------------------------------------------------------------------------------------------------------------------------------------------------------------------------------------------------------------------------------------------------------------------------------------------------------------------------------------------------------------------------------------------------------------------------------------------------------------------------------------------------------------------------------------------------------------------------------------------------------------------------------------------------------------------------------------------------------------------------------------------------------------------------------------------------------------------------------------------------------------------------------------------------------------------------------------------------------------------------------------------------------------------------------------------------------------------------------------------------------------------------------------------------------------------|-------------|-------------|------------|-------------|---|-------------|-------------|-------------|---|-------------|-------------|-------------|---|-------------|-------------|-------------|---|-------------|-------------|-------------|---|-------------|-------------|-------------|---|-------------|-------------|-------------|---|-------------|-------------|-------------|---|-------------|------------|-------------|---|-------------|-------------|------------|---|-------------|-------------|-------------|---|-------------|-------------|-------------|---|-------------|-------------|------------|---|-------------|-------------|-------------|---|-------------|------------|-------------|---|-------------|------------|-------------|---|-------------|-------------|-------------|---|-------------|-------------|-------------|----|------------|------------|-------------|
| 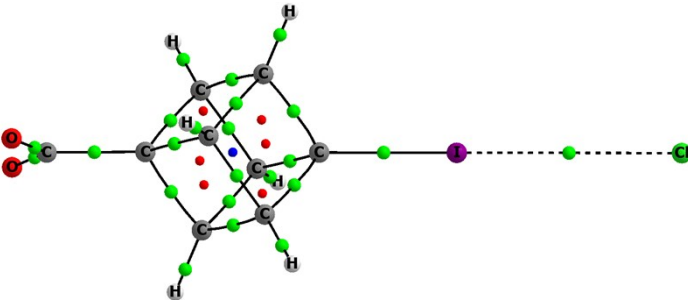   | <p><b>2[CO<sub>2</sub><sup>-</sup>,C-I]:Cl<sup>-</sup></b></p> <table border="1"> <tbody> <tr><td>C</td><td>-1.13780200</td><td>1.26350900</td><td>-0.00005500</td></tr> <tr><td>C</td><td>-0.23727100</td><td>-0.00836200</td><td>0.00000300</td></tr> <tr><td>C</td><td>-1.12434400</td><td>-0.65346500</td><td>1.10573800</td></tr> <tr><td>C</td><td>-2.03145100</td><td>0.61685800</td><td>1.09988600</td></tr> <tr><td>C</td><td>-2.03145200</td><td>0.61675800</td><td>-1.09993500</td></tr> <tr><td>C</td><td>-2.92989900</td><td>-0.03831900</td><td>0.00000700</td></tr> <tr><td>C</td><td>-2.01830800</td><td>-1.29859800</td><td>0.00006300</td></tr> <tr><td>C</td><td>-1.12434500</td><td>-0.65356600</td><td>-1.10567200</td></tr> <tr><td>H</td><td>-0.75873600</td><td>2.28109300</td><td>-0.00010200</td></tr> <tr><td>H</td><td>-0.73215200</td><td>-1.15471800</td><td>1.98610100</td></tr> <tr><td>H</td><td>-2.42505500</td><td>1.12941900</td><td>1.97248400</td></tr> <tr><td>H</td><td>-2.42505600</td><td>1.12923800</td><td>-1.97258100</td></tr> <tr><td>H</td><td>-2.40415800</td><td>-2.31305700</td><td>0.00010800</td></tr> <tr><td>H</td><td>-0.73215300</td><td>-1.15489900</td><td>-1.98598900</td></tr> <tr><td>C</td><td>-4.45706700</td><td>0.01269900</td><td>-0.00000300</td></tr> <tr><td>O</td><td>-4.93196500</td><td>1.17033900</td><td>-0.00000800</td></tr> <tr><td>O</td><td>-5.05687100</td><td>-1.08300300</td><td>-0.00001000</td></tr> <tr><td>I</td><td>1.89504900</td><td>0.00105200</td><td>0.00000000</td></tr> <tr><td>Cl</td><td>5.38247400</td><td>0.01078700</td><td>-0.00000500</td></tr> </tbody> </table> | C           | -1.13780200 | 1.26350900 | -0.00005500 | C | -0.23727100 | -0.00836200 | 0.00000300  | C | -1.12434400 | -0.65346500 | 1.10573800  | C | -2.03145100 | 0.61685800  | 1.09988600  | C | -2.03145200 | 0.61675800  | -1.09993500 | C | -2.92989900 | -0.03831900 | 0.00000700  | C | -2.01830800 | -1.29859800 | 0.00006300  | C | -1.12434500 | -0.65356600 | -1.10567200 | H | -0.75873600 | 2.28109300 | -0.00010200 | H | -0.73215200 | -1.15471800 | 1.98610100 | H | -2.42505500 | 1.12941900  | 1.97248400  | H | -2.42505600 | 1.12923800  | -1.97258100 | H | -2.40415800 | -2.31305700 | 0.00010800 | H | -0.73215300 | -1.15489900 | -1.98598900 | C | -4.45706700 | 0.01269900 | -0.00000300 | O | -4.93196500 | 1.17033900 | -0.00000800 | O | -5.05687100 | -1.08300300 | -0.00001000 | I | 1.89504900  | 0.00105200  | 0.00000000  | Cl | 5.38247400 | 0.01078700 | -0.00000500 |
| C                                                                                   | -1.13780200                                                                                                                                                                                                                                                                                                                                                                                                                                                                                                                                                                                                                                                                                                                                                                                                                                                                                                                                                                                                                                                                                                                                                                                                                                                                                                                                                                                                                                                                                                                                                                                                                                                             | 1.26350900  | -0.00005500 |            |             |   |             |             |             |   |             |             |             |   |             |             |             |   |             |             |             |   |             |             |             |   |             |             |             |   |             |             |             |   |             |            |             |   |             |             |            |   |             |             |             |   |             |             |             |   |             |             |            |   |             |             |             |   |             |            |             |   |             |            |             |   |             |             |             |   |             |             |             |    |            |            |             |
| C                                                                                   | -0.23727100                                                                                                                                                                                                                                                                                                                                                                                                                                                                                                                                                                                                                                                                                                                                                                                                                                                                                                                                                                                                                                                                                                                                                                                                                                                                                                                                                                                                                                                                                                                                                                                                                                                             | -0.00836200 | 0.00000300  |            |             |   |             |             |             |   |             |             |             |   |             |             |             |   |             |             |             |   |             |             |             |   |             |             |             |   |             |             |             |   |             |            |             |   |             |             |            |   |             |             |             |   |             |             |             |   |             |             |            |   |             |             |             |   |             |            |             |   |             |            |             |   |             |             |             |   |             |             |             |    |            |            |             |
| C                                                                                   | -1.12434400                                                                                                                                                                                                                                                                                                                                                                                                                                                                                                                                                                                                                                                                                                                                                                                                                                                                                                                                                                                                                                                                                                                                                                                                                                                                                                                                                                                                                                                                                                                                                                                                                                                             | -0.65346500 | 1.10573800  |            |             |   |             |             |             |   |             |             |             |   |             |             |             |   |             |             |             |   |             |             |             |   |             |             |             |   |             |             |             |   |             |            |             |   |             |             |            |   |             |             |             |   |             |             |             |   |             |             |            |   |             |             |             |   |             |            |             |   |             |            |             |   |             |             |             |   |             |             |             |    |            |            |             |
| C                                                                                   | -2.03145100                                                                                                                                                                                                                                                                                                                                                                                                                                                                                                                                                                                                                                                                                                                                                                                                                                                                                                                                                                                                                                                                                                                                                                                                                                                                                                                                                                                                                                                                                                                                                                                                                                                             | 0.61685800  | 1.09988600  |            |             |   |             |             |             |   |             |             |             |   |             |             |             |   |             |             |             |   |             |             |             |   |             |             |             |   |             |             |             |   |             |            |             |   |             |             |            |   |             |             |             |   |             |             |             |   |             |             |            |   |             |             |             |   |             |            |             |   |             |            |             |   |             |             |             |   |             |             |             |    |            |            |             |
| C                                                                                   | -2.03145200                                                                                                                                                                                                                                                                                                                                                                                                                                                                                                                                                                                                                                                                                                                                                                                                                                                                                                                                                                                                                                                                                                                                                                                                                                                                                                                                                                                                                                                                                                                                                                                                                                                             | 0.61675800  | -1.09993500 |            |             |   |             |             |             |   |             |             |             |   |             |             |             |   |             |             |             |   |             |             |             |   |             |             |             |   |             |             |             |   |             |            |             |   |             |             |            |   |             |             |             |   |             |             |             |   |             |             |            |   |             |             |             |   |             |            |             |   |             |            |             |   |             |             |             |   |             |             |             |    |            |            |             |
| C                                                                                   | -2.92989900                                                                                                                                                                                                                                                                                                                                                                                                                                                                                                                                                                                                                                                                                                                                                                                                                                                                                                                                                                                                                                                                                                                                                                                                                                                                                                                                                                                                                                                                                                                                                                                                                                                             | -0.03831900 | 0.00000700  |            |             |   |             |             |             |   |             |             |             |   |             |             |             |   |             |             |             |   |             |             |             |   |             |             |             |   |             |             |             |   |             |            |             |   |             |             |            |   |             |             |             |   |             |             |             |   |             |             |            |   |             |             |             |   |             |            |             |   |             |            |             |   |             |             |             |   |             |             |             |    |            |            |             |
| C                                                                                   | -2.01830800                                                                                                                                                                                                                                                                                                                                                                                                                                                                                                                                                                                                                                                                                                                                                                                                                                                                                                                                                                                                                                                                                                                                                                                                                                                                                                                                                                                                                                                                                                                                                                                                                                                             | -1.29859800 | 0.00006300  |            |             |   |             |             |             |   |             |             |             |   |             |             |             |   |             |             |             |   |             |             |             |   |             |             |             |   |             |             |             |   |             |            |             |   |             |             |            |   |             |             |             |   |             |             |             |   |             |             |            |   |             |             |             |   |             |            |             |   |             |            |             |   |             |             |             |   |             |             |             |    |            |            |             |
| C                                                                                   | -1.12434500                                                                                                                                                                                                                                                                                                                                                                                                                                                                                                                                                                                                                                                                                                                                                                                                                                                                                                                                                                                                                                                                                                                                                                                                                                                                                                                                                                                                                                                                                                                                                                                                                                                             | -0.65356600 | -1.10567200 |            |             |   |             |             |             |   |             |             |             |   |             |             |             |   |             |             |             |   |             |             |             |   |             |             |             |   |             |             |             |   |             |            |             |   |             |             |            |   |             |             |             |   |             |             |             |   |             |             |            |   |             |             |             |   |             |            |             |   |             |            |             |   |             |             |             |   |             |             |             |    |            |            |             |
| H                                                                                   | -0.75873600                                                                                                                                                                                                                                                                                                                                                                                                                                                                                                                                                                                                                                                                                                                                                                                                                                                                                                                                                                                                                                                                                                                                                                                                                                                                                                                                                                                                                                                                                                                                                                                                                                                             | 2.28109300  | -0.00010200 |            |             |   |             |             |             |   |             |             |             |   |             |             |             |   |             |             |             |   |             |             |             |   |             |             |             |   |             |             |             |   |             |            |             |   |             |             |            |   |             |             |             |   |             |             |             |   |             |             |            |   |             |             |             |   |             |            |             |   |             |            |             |   |             |             |             |   |             |             |             |    |            |            |             |
| H                                                                                   | -0.73215200                                                                                                                                                                                                                                                                                                                                                                                                                                                                                                                                                                                                                                                                                                                                                                                                                                                                                                                                                                                                                                                                                                                                                                                                                                                                                                                                                                                                                                                                                                                                                                                                                                                             | -1.15471800 | 1.98610100  |            |             |   |             |             |             |   |             |             |             |   |             |             |             |   |             |             |             |   |             |             |             |   |             |             |             |   |             |             |             |   |             |            |             |   |             |             |            |   |             |             |             |   |             |             |             |   |             |             |            |   |             |             |             |   |             |            |             |   |             |            |             |   |             |             |             |   |             |             |             |    |            |            |             |
| H                                                                                   | -2.42505500                                                                                                                                                                                                                                                                                                                                                                                                                                                                                                                                                                                                                                                                                                                                                                                                                                                                                                                                                                                                                                                                                                                                                                                                                                                                                                                                                                                                                                                                                                                                                                                                                                                             | 1.12941900  | 1.97248400  |            |             |   |             |             |             |   |             |             |             |   |             |             |             |   |             |             |             |   |             |             |             |   |             |             |             |   |             |             |             |   |             |            |             |   |             |             |            |   |             |             |             |   |             |             |             |   |             |             |            |   |             |             |             |   |             |            |             |   |             |            |             |   |             |             |             |   |             |             |             |    |            |            |             |
| H                                                                                   | -2.42505600                                                                                                                                                                                                                                                                                                                                                                                                                                                                                                                                                                                                                                                                                                                                                                                                                                                                                                                                                                                                                                                                                                                                                                                                                                                                                                                                                                                                                                                                                                                                                                                                                                                             | 1.12923800  | -1.97258100 |            |             |   |             |             |             |   |             |             |             |   |             |             |             |   |             |             |             |   |             |             |             |   |             |             |             |   |             |             |             |   |             |            |             |   |             |             |            |   |             |             |             |   |             |             |             |   |             |             |            |   |             |             |             |   |             |            |             |   |             |            |             |   |             |             |             |   |             |             |             |    |            |            |             |
| H                                                                                   | -2.40415800                                                                                                                                                                                                                                                                                                                                                                                                                                                                                                                                                                                                                                                                                                                                                                                                                                                                                                                                                                                                                                                                                                                                                                                                                                                                                                                                                                                                                                                                                                                                                                                                                                                             | -2.31305700 | 0.00010800  |            |             |   |             |             |             |   |             |             |             |   |             |             |             |   |             |             |             |   |             |             |             |   |             |             |             |   |             |             |             |   |             |            |             |   |             |             |            |   |             |             |             |   |             |             |             |   |             |             |            |   |             |             |             |   |             |            |             |   |             |            |             |   |             |             |             |   |             |             |             |    |            |            |             |
| H                                                                                   | -0.73215300                                                                                                                                                                                                                                                                                                                                                                                                                                                                                                                                                                                                                                                                                                                                                                                                                                                                                                                                                                                                                                                                                                                                                                                                                                                                                                                                                                                                                                                                                                                                                                                                                                                             | -1.15489900 | -1.98598900 |            |             |   |             |             |             |   |             |             |             |   |             |             |             |   |             |             |             |   |             |             |             |   |             |             |             |   |             |             |             |   |             |            |             |   |             |             |            |   |             |             |             |   |             |             |             |   |             |             |            |   |             |             |             |   |             |            |             |   |             |            |             |   |             |             |             |   |             |             |             |    |            |            |             |
| C                                                                                   | -4.45706700                                                                                                                                                                                                                                                                                                                                                                                                                                                                                                                                                                                                                                                                                                                                                                                                                                                                                                                                                                                                                                                                                                                                                                                                                                                                                                                                                                                                                                                                                                                                                                                                                                                             | 0.01269900  | -0.00000300 |            |             |   |             |             |             |   |             |             |             |   |             |             |             |   |             |             |             |   |             |             |             |   |             |             |             |   |             |             |             |   |             |            |             |   |             |             |            |   |             |             |             |   |             |             |             |   |             |             |            |   |             |             |             |   |             |            |             |   |             |            |             |   |             |             |             |   |             |             |             |    |            |            |             |
| O                                                                                   | -4.93196500                                                                                                                                                                                                                                                                                                                                                                                                                                                                                                                                                                                                                                                                                                                                                                                                                                                                                                                                                                                                                                                                                                                                                                                                                                                                                                                                                                                                                                                                                                                                                                                                                                                             | 1.17033900  | -0.00000800 |            |             |   |             |             |             |   |             |             |             |   |             |             |             |   |             |             |             |   |             |             |             |   |             |             |             |   |             |             |             |   |             |            |             |   |             |             |            |   |             |             |             |   |             |             |             |   |             |             |            |   |             |             |             |   |             |            |             |   |             |            |             |   |             |             |             |   |             |             |             |    |            |            |             |
| O                                                                                   | -5.05687100                                                                                                                                                                                                                                                                                                                                                                                                                                                                                                                                                                                                                                                                                                                                                                                                                                                                                                                                                                                                                                                                                                                                                                                                                                                                                                                                                                                                                                                                                                                                                                                                                                                             | -1.08300300 | -0.00001000 |            |             |   |             |             |             |   |             |             |             |   |             |             |             |   |             |             |             |   |             |             |             |   |             |             |             |   |             |             |             |   |             |            |             |   |             |             |            |   |             |             |             |   |             |             |             |   |             |             |            |   |             |             |             |   |             |            |             |   |             |            |             |   |             |             |             |   |             |             |             |    |            |            |             |
| I                                                                                   | 1.89504900                                                                                                                                                                                                                                                                                                                                                                                                                                                                                                                                                                                                                                                                                                                                                                                                                                                                                                                                                                                                                                                                                                                                                                                                                                                                                                                                                                                                                                                                                                                                                                                                                                                              | 0.00105200  | 0.00000000  |            |             |   |             |             |             |   |             |             |             |   |             |             |             |   |             |             |             |   |             |             |             |   |             |             |             |   |             |             |             |   |             |            |             |   |             |             |            |   |             |             |             |   |             |             |             |   |             |             |            |   |             |             |             |   |             |            |             |   |             |            |             |   |             |             |             |   |             |             |             |    |            |            |             |
| Cl                                                                                  | 5.38247400                                                                                                                                                                                                                                                                                                                                                                                                                                                                                                                                                                                                                                                                                                                                                                                                                                                                                                                                                                                                                                                                                                                                                                                                                                                                                                                                                                                                                                                                                                                                                                                                                                                              | 0.01078700  | -0.00000500 |            |             |   |             |             |             |   |             |             |             |   |             |             |             |   |             |             |             |   |             |             |             |   |             |             |             |   |             |             |             |   |             |            |             |   |             |             |            |   |             |             |             |   |             |             |             |   |             |             |            |   |             |             |             |   |             |            |             |   |             |            |             |   |             |             |             |   |             |             |             |    |            |            |             |
|   | <p><b>2[CO<sub>2</sub><sup>-</sup>,C-I]:Br<sup>-</sup></b></p> <table border="1"> <tbody> <tr><td>C</td><td>-1.79835700</td><td>1.26394700</td><td>-0.00004700</td></tr> <tr><td>C</td><td>-0.90113700</td><td>-0.00894500</td><td>0.00000500</td></tr> <tr><td>C</td><td>-1.78548300</td><td>-0.65410900</td><td>1.10633300</td></tr> <tr><td>C</td><td>-2.69181200</td><td>0.61692200</td><td>1.09998900</td></tr> <tr><td>C</td><td>-2.69181300</td><td>0.61683200</td><td>-1.10002900</td></tr> <tr><td>C</td><td>-3.59009000</td><td>-0.03794300</td><td>0.00000800</td></tr> <tr><td>C</td><td>-2.67927800</td><td>-1.29873100</td><td>0.00005700</td></tr> <tr><td>C</td><td>-1.78548300</td><td>-0.65419900</td><td>-1.10627000</td></tr> <tr><td>H</td><td>-1.41858400</td><td>2.28101300</td><td>-0.00009000</td></tr> <tr><td>H</td><td>-1.39301100</td><td>-1.15527600</td><td>1.98631300</td></tr> <tr><td>H</td><td>-3.08426800</td><td>1.12969600</td><td>1.97273000</td></tr> <tr><td>H</td><td>-3.08427100</td><td>1.12953300</td><td>-1.97281300</td></tr> <tr><td>H</td><td>-3.06460600</td><td>-2.31320200</td><td>0.00009800</td></tr> <tr><td>H</td><td>-1.39301100</td><td>-1.15543700</td><td>-1.98621000</td></tr> <tr><td>C</td><td>-5.11734900</td><td>0.01417300</td><td>0.00000300</td></tr> <tr><td>O</td><td>-5.58979900</td><td>1.17248000</td><td>-0.00001700</td></tr> <tr><td>O</td><td>-5.71697200</td><td>-1.08119800</td><td>0.00001800</td></tr> <tr><td>I</td><td>1.23058000</td><td>-0.00038500</td><td>0.00000500</td></tr> <tr><td>Br</td><td>5.05474300</td><td>0.00646200</td><td>-0.00001700</td></tr> </tbody> </table>  | C           | -1.79835700 | 1.26394700 | -0.00004700 | C | -0.90113700 | -0.00894500 | 0.00000500  | C | -1.78548300 | -0.65410900 | 1.10633300  | C | -2.69181200 | 0.61692200  | 1.09998900  | C | -2.69181300 | 0.61683200  | -1.10002900 | C | -3.59009000 | -0.03794300 | 0.00000800  | C | -2.67927800 | -1.29873100 | 0.00005700  | C | -1.78548300 | -0.65419900 | -1.10627000 | H | -1.41858400 | 2.28101300 | -0.00009000 | H | -1.39301100 | -1.15527600 | 1.98631300 | H | -3.08426800 | 1.12969600  | 1.97273000  | H | -3.08427100 | 1.12953300  | -1.97281300 | H | -3.06460600 | -2.31320200 | 0.00009800 | H | -1.39301100 | -1.15543700 | -1.98621000 | C | -5.11734900 | 0.01417300 | 0.00000300  | O | -5.58979900 | 1.17248000 | -0.00001700 | O | -5.71697200 | -1.08119800 | 0.00001800  | I | 1.23058000  | -0.00038500 | 0.00000500  | Br | 5.05474300 | 0.00646200 | -0.00001700 |
| C                                                                                   | -1.79835700                                                                                                                                                                                                                                                                                                                                                                                                                                                                                                                                                                                                                                                                                                                                                                                                                                                                                                                                                                                                                                                                                                                                                                                                                                                                                                                                                                                                                                                                                                                                                                                                                                                             | 1.26394700  | -0.00004700 |            |             |   |             |             |             |   |             |             |             |   |             |             |             |   |             |             |             |   |             |             |             |   |             |             |             |   |             |             |             |   |             |            |             |   |             |             |            |   |             |             |             |   |             |             |             |   |             |             |            |   |             |             |             |   |             |            |             |   |             |            |             |   |             |             |             |   |             |             |             |    |            |            |             |
| C                                                                                   | -0.90113700                                                                                                                                                                                                                                                                                                                                                                                                                                                                                                                                                                                                                                                                                                                                                                                                                                                                                                                                                                                                                                                                                                                                                                                                                                                                                                                                                                                                                                                                                                                                                                                                                                                             | -0.00894500 | 0.00000500  |            |             |   |             |             |             |   |             |             |             |   |             |             |             |   |             |             |             |   |             |             |             |   |             |             |             |   |             |             |             |   |             |            |             |   |             |             |            |   |             |             |             |   |             |             |             |   |             |             |            |   |             |             |             |   |             |            |             |   |             |            |             |   |             |             |             |   |             |             |             |    |            |            |             |
| C                                                                                   | -1.78548300                                                                                                                                                                                                                                                                                                                                                                                                                                                                                                                                                                                                                                                                                                                                                                                                                                                                                                                                                                                                                                                                                                                                                                                                                                                                                                                                                                                                                                                                                                                                                                                                                                                             | -0.65410900 | 1.10633300  |            |             |   |             |             |             |   |             |             |             |   |             |             |             |   |             |             |             |   |             |             |             |   |             |             |             |   |             |             |             |   |             |            |             |   |             |             |            |   |             |             |             |   |             |             |             |   |             |             |            |   |             |             |             |   |             |            |             |   |             |            |             |   |             |             |             |   |             |             |             |    |            |            |             |
| C                                                                                   | -2.69181200                                                                                                                                                                                                                                                                                                                                                                                                                                                                                                                                                                                                                                                                                                                                                                                                                                                                                                                                                                                                                                                                                                                                                                                                                                                                                                                                                                                                                                                                                                                                                                                                                                                             | 0.61692200  | 1.09998900  |            |             |   |             |             |             |   |             |             |             |   |             |             |             |   |             |             |             |   |             |             |             |   |             |             |             |   |             |             |             |   |             |            |             |   |             |             |            |   |             |             |             |   |             |             |             |   |             |             |            |   |             |             |             |   |             |            |             |   |             |            |             |   |             |             |             |   |             |             |             |    |            |            |             |
| C                                                                                   | -2.69181300                                                                                                                                                                                                                                                                                                                                                                                                                                                                                                                                                                                                                                                                                                                                                                                                                                                                                                                                                                                                                                                                                                                                                                                                                                                                                                                                                                                                                                                                                                                                                                                                                                                             | 0.61683200  | -1.10002900 |            |             |   |             |             |             |   |             |             |             |   |             |             |             |   |             |             |             |   |             |             |             |   |             |             |             |   |             |             |             |   |             |            |             |   |             |             |            |   |             |             |             |   |             |             |             |   |             |             |            |   |             |             |             |   |             |            |             |   |             |            |             |   |             |             |             |   |             |             |             |    |            |            |             |
| C                                                                                   | -3.59009000                                                                                                                                                                                                                                                                                                                                                                                                                                                                                                                                                                                                                                                                                                                                                                                                                                                                                                                                                                                                                                                                                                                                                                                                                                                                                                                                                                                                                                                                                                                                                                                                                                                             | -0.03794300 | 0.00000800  |            |             |   |             |             |             |   |             |             |             |   |             |             |             |   |             |             |             |   |             |             |             |   |             |             |             |   |             |             |             |   |             |            |             |   |             |             |            |   |             |             |             |   |             |             |             |   |             |             |            |   |             |             |             |   |             |            |             |   |             |            |             |   |             |             |             |   |             |             |             |    |            |            |             |
| C                                                                                   | -2.67927800                                                                                                                                                                                                                                                                                                                                                                                                                                                                                                                                                                                                                                                                                                                                                                                                                                                                                                                                                                                                                                                                                                                                                                                                                                                                                                                                                                                                                                                                                                                                                                                                                                                             | -1.29873100 | 0.00005700  |            |             |   |             |             |             |   |             |             |             |   |             |             |             |   |             |             |             |   |             |             |             |   |             |             |             |   |             |             |             |   |             |            |             |   |             |             |            |   |             |             |             |   |             |             |             |   |             |             |            |   |             |             |             |   |             |            |             |   |             |            |             |   |             |             |             |   |             |             |             |    |            |            |             |
| C                                                                                   | -1.78548300                                                                                                                                                                                                                                                                                                                                                                                                                                                                                                                                                                                                                                                                                                                                                                                                                                                                                                                                                                                                                                                                                                                                                                                                                                                                                                                                                                                                                                                                                                                                                                                                                                                             | -0.65419900 | -1.10627000 |            |             |   |             |             |             |   |             |             |             |   |             |             |             |   |             |             |             |   |             |             |             |   |             |             |             |   |             |             |             |   |             |            |             |   |             |             |            |   |             |             |             |   |             |             |             |   |             |             |            |   |             |             |             |   |             |            |             |   |             |            |             |   |             |             |             |   |             |             |             |    |            |            |             |
| H                                                                                   | -1.41858400                                                                                                                                                                                                                                                                                                                                                                                                                                                                                                                                                                                                                                                                                                                                                                                                                                                                                                                                                                                                                                                                                                                                                                                                                                                                                                                                                                                                                                                                                                                                                                                                                                                             | 2.28101300  | -0.00009000 |            |             |   |             |             |             |   |             |             |             |   |             |             |             |   |             |             |             |   |             |             |             |   |             |             |             |   |             |             |             |   |             |            |             |   |             |             |            |   |             |             |             |   |             |             |             |   |             |             |            |   |             |             |             |   |             |            |             |   |             |            |             |   |             |             |             |   |             |             |             |    |            |            |             |
| H                                                                                   | -1.39301100                                                                                                                                                                                                                                                                                                                                                                                                                                                                                                                                                                                                                                                                                                                                                                                                                                                                                                                                                                                                                                                                                                                                                                                                                                                                                                                                                                                                                                                                                                                                                                                                                                                             | -1.15527600 | 1.98631300  |            |             |   |             |             |             |   |             |             |             |   |             |             |             |   |             |             |             |   |             |             |             |   |             |             |             |   |             |             |             |   |             |            |             |   |             |             |            |   |             |             |             |   |             |             |             |   |             |             |            |   |             |             |             |   |             |            |             |   |             |            |             |   |             |             |             |   |             |             |             |    |            |            |             |
| H                                                                                   | -3.08426800                                                                                                                                                                                                                                                                                                                                                                                                                                                                                                                                                                                                                                                                                                                                                                                                                                                                                                                                                                                                                                                                                                                                                                                                                                                                                                                                                                                                                                                                                                                                                                                                                                                             | 1.12969600  | 1.97273000  |            |             |   |             |             |             |   |             |             |             |   |             |             |             |   |             |             |             |   |             |             |             |   |             |             |             |   |             |             |             |   |             |            |             |   |             |             |            |   |             |             |             |   |             |             |             |   |             |             |            |   |             |             |             |   |             |            |             |   |             |            |             |   |             |             |             |   |             |             |             |    |            |            |             |
| H                                                                                   | -3.08427100                                                                                                                                                                                                                                                                                                                                                                                                                                                                                                                                                                                                                                                                                                                                                                                                                                                                                                                                                                                                                                                                                                                                                                                                                                                                                                                                                                                                                                                                                                                                                                                                                                                             | 1.12953300  | -1.97281300 |            |             |   |             |             |             |   |             |             |             |   |             |             |             |   |             |             |             |   |             |             |             |   |             |             |             |   |             |             |             |   |             |            |             |   |             |             |            |   |             |             |             |   |             |             |             |   |             |             |            |   |             |             |             |   |             |            |             |   |             |            |             |   |             |             |             |   |             |             |             |    |            |            |             |
| H                                                                                   | -3.06460600                                                                                                                                                                                                                                                                                                                                                                                                                                                                                                                                                                                                                                                                                                                                                                                                                                                                                                                                                                                                                                                                                                                                                                                                                                                                                                                                                                                                                                                                                                                                                                                                                                                             | -2.31320200 | 0.00009800  |            |             |   |             |             |             |   |             |             |             |   |             |             |             |   |             |             |             |   |             |             |             |   |             |             |             |   |             |             |             |   |             |            |             |   |             |             |            |   |             |             |             |   |             |             |             |   |             |             |            |   |             |             |             |   |             |            |             |   |             |            |             |   |             |             |             |   |             |             |             |    |            |            |             |
| H                                                                                   | -1.39301100                                                                                                                                                                                                                                                                                                                                                                                                                                                                                                                                                                                                                                                                                                                                                                                                                                                                                                                                                                                                                                                                                                                                                                                                                                                                                                                                                                                                                                                                                                                                                                                                                                                             | -1.15543700 | -1.98621000 |            |             |   |             |             |             |   |             |             |             |   |             |             |             |   |             |             |             |   |             |             |             |   |             |             |             |   |             |             |             |   |             |            |             |   |             |             |            |   |             |             |             |   |             |             |             |   |             |             |            |   |             |             |             |   |             |            |             |   |             |            |             |   |             |             |             |   |             |             |             |    |            |            |             |
| C                                                                                   | -5.11734900                                                                                                                                                                                                                                                                                                                                                                                                                                                                                                                                                                                                                                                                                                                                                                                                                                                                                                                                                                                                                                                                                                                                                                                                                                                                                                                                                                                                                                                                                                                                                                                                                                                             | 0.01417300  | 0.00000300  |            |             |   |             |             |             |   |             |             |             |   |             |             |             |   |             |             |             |   |             |             |             |   |             |             |             |   |             |             |             |   |             |            |             |   |             |             |            |   |             |             |             |   |             |             |             |   |             |             |            |   |             |             |             |   |             |            |             |   |             |            |             |   |             |             |             |   |             |             |             |    |            |            |             |
| O                                                                                   | -5.58979900                                                                                                                                                                                                                                                                                                                                                                                                                                                                                                                                                                                                                                                                                                                                                                                                                                                                                                                                                                                                                                                                                                                                                                                                                                                                                                                                                                                                                                                                                                                                                                                                                                                             | 1.17248000  | -0.00001700 |            |             |   |             |             |             |   |             |             |             |   |             |             |             |   |             |             |             |   |             |             |             |   |             |             |             |   |             |             |             |   |             |            |             |   |             |             |            |   |             |             |             |   |             |             |             |   |             |             |            |   |             |             |             |   |             |            |             |   |             |            |             |   |             |             |             |   |             |             |             |    |            |            |             |
| O                                                                                   | -5.71697200                                                                                                                                                                                                                                                                                                                                                                                                                                                                                                                                                                                                                                                                                                                                                                                                                                                                                                                                                                                                                                                                                                                                                                                                                                                                                                                                                                                                                                                                                                                                                                                                                                                             | -1.08119800 | 0.00001800  |            |             |   |             |             |             |   |             |             |             |   |             |             |             |   |             |             |             |   |             |             |             |   |             |             |             |   |             |             |             |   |             |            |             |   |             |             |            |   |             |             |             |   |             |             |             |   |             |             |            |   |             |             |             |   |             |            |             |   |             |            |             |   |             |             |             |   |             |             |             |    |            |            |             |
| I                                                                                   | 1.23058000                                                                                                                                                                                                                                                                                                                                                                                                                                                                                                                                                                                                                                                                                                                                                                                                                                                                                                                                                                                                                                                                                                                                                                                                                                                                                                                                                                                                                                                                                                                                                                                                                                                              | -0.00038500 | 0.00000500  |            |             |   |             |             |             |   |             |             |             |   |             |             |             |   |             |             |             |   |             |             |             |   |             |             |             |   |             |             |             |   |             |            |             |   |             |             |            |   |             |             |             |   |             |             |             |   |             |             |            |   |             |             |             |   |             |            |             |   |             |            |             |   |             |             |             |   |             |             |             |    |            |            |             |
| Br                                                                                  | 5.05474300                                                                                                                                                                                                                                                                                                                                                                                                                                                                                                                                                                                                                                                                                                                                                                                                                                                                                                                                                                                                                                                                                                                                                                                                                                                                                                                                                                                                                                                                                                                                                                                                                                                              | 0.00646200  | -0.00001700 |            |             |   |             |             |             |   |             |             |             |   |             |             |             |   |             |             |             |   |             |             |             |   |             |             |             |   |             |             |             |   |             |            |             |   |             |             |            |   |             |             |             |   |             |             |             |   |             |             |            |   |             |             |             |   |             |            |             |   |             |            |             |   |             |             |             |   |             |             |             |    |            |            |             |
|  | <p><b>3[CO<sub>2</sub><sup>-</sup>,C-Br]</b></p> <table border="1"> <tbody> <tr><td>C</td><td>0.90301800</td><td>0.00335000</td><td>-0.00473900</td></tr> <tr><td>C</td><td>-1.67295300</td><td>0.03087500</td><td>-0.02778800</td></tr> <tr><td>C</td><td>0.42083000</td><td>1.39326200</td><td>-0.39891600</td></tr> <tr><td>C</td><td>0.40969300</td><td>-1.02709300</td><td>-1.01085500</td></tr> <tr><td>C</td><td>0.39670700</td><td>-0.34982000</td><td>1.38692300</td></tr> <tr><td>C</td><td>-1.11731700</td><td>1.44405400</td><td>-0.20114000</td></tr> <tr><td>C</td><td>-1.12374100</td><td>-0.84733300</td><td>-1.15754100</td></tr> <tr><td>C</td><td>-1.14155400</td><td>-0.53046900</td><td>1.29916900</td></tr> <tr><td>H</td><td>0.69625800</td><td>1.57723900</td><td>-1.43963600</td></tr> <tr><td>H</td><td>0.92657200</td><td>2.14407200</td><td>0.20862400</td></tr> <tr><td>H</td><td>0.66244100</td><td>-2.02511000</td><td>-0.64690300</td></tr> <tr><td>H</td><td>0.92040200</td><td>-0.88766700</td><td>-1.96393100</td></tr> <tr><td>H</td><td>0.66641000</td><td>0.45396100</td><td>2.07478700</td></tr> <tr><td>H</td><td>0.88536200</td><td>-1.25922100</td><td>1.73792200</td></tr> <tr><td>H</td><td>-1.37840800</td><td>2.03569700</td><td>0.67651900</td></tr> <tr><td>H</td><td>-1.60606900</td><td>1.92361900</td><td>-1.04765500</td></tr> <tr><td>H</td><td>-1.35621000</td><td>-0.37591600</td><td>-2.11572800</td></tr> <tr><td>H</td><td>-1.64091600</td><td>-1.80467100</td><td>-1.12942400</td></tr> </tbody> </table>                                                                                                    | C           | 0.90301800  | 0.00335000 | -0.00473900 | C | -1.67295300 | 0.03087500  | -0.02778800 | C | 0.42083000  | 1.39326200  | -0.39891600 | C | 0.40969300  | -1.02709300 | -1.01085500 | C | 0.39670700  | -0.34982000 | 1.38692300  | C | -1.11731700 | 1.44405400  | -0.20114000 | C | -1.12374100 | -0.84733300 | -1.15754100 | C | -1.14155400 | -0.53046900 | 1.29916900  | H | 0.69625800  | 1.57723900 | -1.43963600 | H | 0.92657200  | 2.14407200  | 0.20862400 | H | 0.66244100  | -2.02511000 | -0.64690300 | H | 0.92040200  | -0.88766700 | -1.96393100 | H | 0.66641000  | 0.45396100  | 2.07478700 | H | 0.88536200  | -1.25922100 | 1.73792200  | H | -1.37840800 | 2.03569700 | 0.67651900  | H | -1.60606900 | 1.92361900 | -1.04765500 | H | -1.35621000 | -0.37591600 | -2.11572800 | H | -1.64091600 | -1.80467100 | -1.12942400 |    |            |            |             |
| C                                                                                   | 0.90301800                                                                                                                                                                                                                                                                                                                                                                                                                                                                                                                                                                                                                                                                                                                                                                                                                                                                                                                                                                                                                                                                                                                                                                                                                                                                                                                                                                                                                                                                                                                                                                                                                                                              | 0.00335000  | -0.00473900 |            |             |   |             |             |             |   |             |             |             |   |             |             |             |   |             |             |             |   |             |             |             |   |             |             |             |   |             |             |             |   |             |            |             |   |             |             |            |   |             |             |             |   |             |             |             |   |             |             |            |   |             |             |             |   |             |            |             |   |             |            |             |   |             |             |             |   |             |             |             |    |            |            |             |
| C                                                                                   | -1.67295300                                                                                                                                                                                                                                                                                                                                                                                                                                                                                                                                                                                                                                                                                                                                                                                                                                                                                                                                                                                                                                                                                                                                                                                                                                                                                                                                                                                                                                                                                                                                                                                                                                                             | 0.03087500  | -0.02778800 |            |             |   |             |             |             |   |             |             |             |   |             |             |             |   |             |             |             |   |             |             |             |   |             |             |             |   |             |             |             |   |             |            |             |   |             |             |            |   |             |             |             |   |             |             |             |   |             |             |            |   |             |             |             |   |             |            |             |   |             |            |             |   |             |             |             |   |             |             |             |    |            |            |             |
| C                                                                                   | 0.42083000                                                                                                                                                                                                                                                                                                                                                                                                                                                                                                                                                                                                                                                                                                                                                                                                                                                                                                                                                                                                                                                                                                                                                                                                                                                                                                                                                                                                                                                                                                                                                                                                                                                              | 1.39326200  | -0.39891600 |            |             |   |             |             |             |   |             |             |             |   |             |             |             |   |             |             |             |   |             |             |             |   |             |             |             |   |             |             |             |   |             |            |             |   |             |             |            |   |             |             |             |   |             |             |             |   |             |             |            |   |             |             |             |   |             |            |             |   |             |            |             |   |             |             |             |   |             |             |             |    |            |            |             |
| C                                                                                   | 0.40969300                                                                                                                                                                                                                                                                                                                                                                                                                                                                                                                                                                                                                                                                                                                                                                                                                                                                                                                                                                                                                                                                                                                                                                                                                                                                                                                                                                                                                                                                                                                                                                                                                                                              | -1.02709300 | -1.01085500 |            |             |   |             |             |             |   |             |             |             |   |             |             |             |   |             |             |             |   |             |             |             |   |             |             |             |   |             |             |             |   |             |            |             |   |             |             |            |   |             |             |             |   |             |             |             |   |             |             |            |   |             |             |             |   |             |            |             |   |             |            |             |   |             |             |             |   |             |             |             |    |            |            |             |
| C                                                                                   | 0.39670700                                                                                                                                                                                                                                                                                                                                                                                                                                                                                                                                                                                                                                                                                                                                                                                                                                                                                                                                                                                                                                                                                                                                                                                                                                                                                                                                                                                                                                                                                                                                                                                                                                                              | -0.34982000 | 1.38692300  |            |             |   |             |             |             |   |             |             |             |   |             |             |             |   |             |             |             |   |             |             |             |   |             |             |             |   |             |             |             |   |             |            |             |   |             |             |            |   |             |             |             |   |             |             |             |   |             |             |            |   |             |             |             |   |             |            |             |   |             |            |             |   |             |             |             |   |             |             |             |    |            |            |             |
| C                                                                                   | -1.11731700                                                                                                                                                                                                                                                                                                                                                                                                                                                                                                                                                                                                                                                                                                                                                                                                                                                                                                                                                                                                                                                                                                                                                                                                                                                                                                                                                                                                                                                                                                                                                                                                                                                             | 1.44405400  | -0.20114000 |            |             |   |             |             |             |   |             |             |             |   |             |             |             |   |             |             |             |   |             |             |             |   |             |             |             |   |             |             |             |   |             |            |             |   |             |             |            |   |             |             |             |   |             |             |             |   |             |             |            |   |             |             |             |   |             |            |             |   |             |            |             |   |             |             |             |   |             |             |             |    |            |            |             |
| C                                                                                   | -1.12374100                                                                                                                                                                                                                                                                                                                                                                                                                                                                                                                                                                                                                                                                                                                                                                                                                                                                                                                                                                                                                                                                                                                                                                                                                                                                                                                                                                                                                                                                                                                                                                                                                                                             | -0.84733300 | -1.15754100 |            |             |   |             |             |             |   |             |             |             |   |             |             |             |   |             |             |             |   |             |             |             |   |             |             |             |   |             |             |             |   |             |            |             |   |             |             |            |   |             |             |             |   |             |             |             |   |             |             |            |   |             |             |             |   |             |            |             |   |             |            |             |   |             |             |             |   |             |             |             |    |            |            |             |
| C                                                                                   | -1.14155400                                                                                                                                                                                                                                                                                                                                                                                                                                                                                                                                                                                                                                                                                                                                                                                                                                                                                                                                                                                                                                                                                                                                                                                                                                                                                                                                                                                                                                                                                                                                                                                                                                                             | -0.53046900 | 1.29916900  |            |             |   |             |             |             |   |             |             |             |   |             |             |             |   |             |             |             |   |             |             |             |   |             |             |             |   |             |             |             |   |             |            |             |   |             |             |            |   |             |             |             |   |             |             |             |   |             |             |            |   |             |             |             |   |             |            |             |   |             |            |             |   |             |             |             |   |             |             |             |    |            |            |             |
| H                                                                                   | 0.69625800                                                                                                                                                                                                                                                                                                                                                                                                                                                                                                                                                                                                                                                                                                                                                                                                                                                                                                                                                                                                                                                                                                                                                                                                                                                                                                                                                                                                                                                                                                                                                                                                                                                              | 1.57723900  | -1.43963600 |            |             |   |             |             |             |   |             |             |             |   |             |             |             |   |             |             |             |   |             |             |             |   |             |             |             |   |             |             |             |   |             |            |             |   |             |             |            |   |             |             |             |   |             |             |             |   |             |             |            |   |             |             |             |   |             |            |             |   |             |            |             |   |             |             |             |   |             |             |             |    |            |            |             |
| H                                                                                   | 0.92657200                                                                                                                                                                                                                                                                                                                                                                                                                                                                                                                                                                                                                                                                                                                                                                                                                                                                                                                                                                                                                                                                                                                                                                                                                                                                                                                                                                                                                                                                                                                                                                                                                                                              | 2.14407200  | 0.20862400  |            |             |   |             |             |             |   |             |             |             |   |             |             |             |   |             |             |             |   |             |             |             |   |             |             |             |   |             |             |             |   |             |            |             |   |             |             |            |   |             |             |             |   |             |             |             |   |             |             |            |   |             |             |             |   |             |            |             |   |             |            |             |   |             |             |             |   |             |             |             |    |            |            |             |
| H                                                                                   | 0.66244100                                                                                                                                                                                                                                                                                                                                                                                                                                                                                                                                                                                                                                                                                                                                                                                                                                                                                                                                                                                                                                                                                                                                                                                                                                                                                                                                                                                                                                                                                                                                                                                                                                                              | -2.02511000 | -0.64690300 |            |             |   |             |             |             |   |             |             |             |   |             |             |             |   |             |             |             |   |             |             |             |   |             |             |             |   |             |             |             |   |             |            |             |   |             |             |            |   |             |             |             |   |             |             |             |   |             |             |            |   |             |             |             |   |             |            |             |   |             |            |             |   |             |             |             |   |             |             |             |    |            |            |             |
| H                                                                                   | 0.92040200                                                                                                                                                                                                                                                                                                                                                                                                                                                                                                                                                                                                                                                                                                                                                                                                                                                                                                                                                                                                                                                                                                                                                                                                                                                                                                                                                                                                                                                                                                                                                                                                                                                              | -0.88766700 | -1.96393100 |            |             |   |             |             |             |   |             |             |             |   |             |             |             |   |             |             |             |   |             |             |             |   |             |             |             |   |             |             |             |   |             |            |             |   |             |             |            |   |             |             |             |   |             |             |             |   |             |             |            |   |             |             |             |   |             |            |             |   |             |            |             |   |             |             |             |   |             |             |             |    |            |            |             |
| H                                                                                   | 0.66641000                                                                                                                                                                                                                                                                                                                                                                                                                                                                                                                                                                                                                                                                                                                                                                                                                                                                                                                                                                                                                                                                                                                                                                                                                                                                                                                                                                                                                                                                                                                                                                                                                                                              | 0.45396100  | 2.07478700  |            |             |   |             |             |             |   |             |             |             |   |             |             |             |   |             |             |             |   |             |             |             |   |             |             |             |   |             |             |             |   |             |            |             |   |             |             |            |   |             |             |             |   |             |             |             |   |             |             |            |   |             |             |             |   |             |            |             |   |             |            |             |   |             |             |             |   |             |             |             |    |            |            |             |
| H                                                                                   | 0.88536200                                                                                                                                                                                                                                                                                                                                                                                                                                                                                                                                                                                                                                                                                                                                                                                                                                                                                                                                                                                                                                                                                                                                                                                                                                                                                                                                                                                                                                                                                                                                                                                                                                                              | -1.25922100 | 1.73792200  |            |             |   |             |             |             |   |             |             |             |   |             |             |             |   |             |             |             |   |             |             |             |   |             |             |             |   |             |             |             |   |             |            |             |   |             |             |            |   |             |             |             |   |             |             |             |   |             |             |            |   |             |             |             |   |             |            |             |   |             |            |             |   |             |             |             |   |             |             |             |    |            |            |             |
| H                                                                                   | -1.37840800                                                                                                                                                                                                                                                                                                                                                                                                                                                                                                                                                                                                                                                                                                                                                                                                                                                                                                                                                                                                                                                                                                                                                                                                                                                                                                                                                                                                                                                                                                                                                                                                                                                             | 2.03569700  | 0.67651900  |            |             |   |             |             |             |   |             |             |             |   |             |             |             |   |             |             |             |   |             |             |             |   |             |             |             |   |             |             |             |   |             |            |             |   |             |             |            |   |             |             |             |   |             |             |             |   |             |             |            |   |             |             |             |   |             |            |             |   |             |            |             |   |             |             |             |   |             |             |             |    |            |            |             |
| H                                                                                   | -1.60606900                                                                                                                                                                                                                                                                                                                                                                                                                                                                                                                                                                                                                                                                                                                                                                                                                                                                                                                                                                                                                                                                                                                                                                                                                                                                                                                                                                                                                                                                                                                                                                                                                                                             | 1.92361900  | -1.04765500 |            |             |   |             |             |             |   |             |             |             |   |             |             |             |   |             |             |             |   |             |             |             |   |             |             |             |   |             |             |             |   |             |            |             |   |             |             |            |   |             |             |             |   |             |             |             |   |             |             |            |   |             |             |             |   |             |            |             |   |             |            |             |   |             |             |             |   |             |             |             |    |            |            |             |
| H                                                                                   | -1.35621000                                                                                                                                                                                                                                                                                                                                                                                                                                                                                                                                                                                                                                                                                                                                                                                                                                                                                                                                                                                                                                                                                                                                                                                                                                                                                                                                                                                                                                                                                                                                                                                                                                                             | -0.37591600 | -2.11572800 |            |             |   |             |             |             |   |             |             |             |   |             |             |             |   |             |             |             |   |             |             |             |   |             |             |             |   |             |             |             |   |             |            |             |   |             |             |            |   |             |             |             |   |             |             |             |   |             |             |            |   |             |             |             |   |             |            |             |   |             |            |             |   |             |             |             |   |             |             |             |    |            |            |             |
| H                                                                                   | -1.64091600                                                                                                                                                                                                                                                                                                                                                                                                                                                                                                                                                                                                                                                                                                                                                                                                                                                                                                                                                                                                                                                                                                                                                                                                                                                                                                                                                                                                                                                                                                                                                                                                                                                             | -1.80467100 | -1.12942400 |            |             |   |             |             |             |   |             |             |             |   |             |             |             |   |             |             |             |   |             |             |             |   |             |             |             |   |             |             |             |   |             |            |             |   |             |             |            |   |             |             |             |   |             |             |             |   |             |             |            |   |             |             |             |   |             |            |             |   |             |            |             |   |             |             |             |   |             |             |             |    |            |            |             |

|                                                         |                                                                                                                                                                                                                                                                                                                                                                                                                                                                                                                                                                                                                                                                                                                                                                                                                                                                                                                                                                                                                                                                                                                                                                                                                                                                                                                                                                                                                                                                                                                                                                                                                                                                                                                                                                                                                                                                                                                                                                                                                                                                                                                                                                        |                                                                                                                                                                                                                                                                                                                                                                                                                                                                                                                            |             |             |             |            |            |             |             |            |             |             |             |            |             |             |             |            |             |             |             |            |             |             |             |            |             |            |             |   |             |             |             |   |             |             |            |   |            |            |             |   |            |            |            |   |            |             |             |   |            |             |             |   |            |            |            |   |            |             |            |   |             |            |            |   |             |            |             |   |             |             |             |   |             |             |             |   |             |             |            |   |             |             |            |   |             |             |            |   |             |            |            |   |             |             |            |    |            |             |            |   |            |             |            |
|---------------------------------------------------------|------------------------------------------------------------------------------------------------------------------------------------------------------------------------------------------------------------------------------------------------------------------------------------------------------------------------------------------------------------------------------------------------------------------------------------------------------------------------------------------------------------------------------------------------------------------------------------------------------------------------------------------------------------------------------------------------------------------------------------------------------------------------------------------------------------------------------------------------------------------------------------------------------------------------------------------------------------------------------------------------------------------------------------------------------------------------------------------------------------------------------------------------------------------------------------------------------------------------------------------------------------------------------------------------------------------------------------------------------------------------------------------------------------------------------------------------------------------------------------------------------------------------------------------------------------------------------------------------------------------------------------------------------------------------------------------------------------------------------------------------------------------------------------------------------------------------------------------------------------------------------------------------------------------------------------------------------------------------------------------------------------------------------------------------------------------------------------------------------------------------------------------------------------------------|----------------------------------------------------------------------------------------------------------------------------------------------------------------------------------------------------------------------------------------------------------------------------------------------------------------------------------------------------------------------------------------------------------------------------------------------------------------------------------------------------------------------------|-------------|-------------|-------------|------------|------------|-------------|-------------|------------|-------------|-------------|-------------|------------|-------------|-------------|-------------|------------|-------------|-------------|-------------|------------|-------------|-------------|-------------|------------|-------------|------------|-------------|---|-------------|-------------|-------------|---|-------------|-------------|------------|---|------------|------------|-------------|---|------------|------------|------------|---|------------|-------------|-------------|---|------------|-------------|-------------|---|------------|------------|------------|---|------------|-------------|------------|---|-------------|------------|------------|---|-------------|------------|-------------|---|-------------|-------------|-------------|---|-------------|-------------|-------------|---|-------------|-------------|------------|---|-------------|-------------|------------|---|-------------|-------------|------------|---|-------------|------------|------------|---|-------------|-------------|------------|----|------------|-------------|------------|---|------------|-------------|------------|
|                                                         |                                                                                                                                                                                                                                                                                                                                                                                                                                                                                                                                                                                                                                                                                                                                                                                                                                                                                                                                                                                                                                                                                                                                                                                                                                                                                                                                                                                                                                                                                                                                                                                                                                                                                                                                                                                                                                                                                                                                                                                                                                                                                                                                                                        | <table> <tbody> <tr><td>H</td><td>-1.42028300</td><td>-1.58256800</td><td>1.36017800</td></tr> <tr><td>H</td><td>-1.63029300</td><td>-0.01846900</td><td>2.12962800</td></tr> <tr><td>C</td><td>-3.23669600</td><td>-0.01012800</td><td>0.00145700</td></tr> <tr><td>O</td><td>-3.81473800</td><td>1.09344900</td><td>0.02736200</td></tr> <tr><td>O</td><td>-3.72371900</td><td>-1.15911300</td><td>0.02245100</td></tr> <tr><td>Br</td><td>2.90155600</td><td>-0.00845300</td><td>0.01250500</td></tr> </tbody> </table> | H           | -1.42028300 | -1.58256800 | 1.36017800 | H          | -1.63029300 | -0.01846900 | 2.12962800 | C           | -3.23669600 | -0.01012800 | 0.00145700 | O           | -3.81473800 | 1.09344900  | 0.02736200 | O           | -3.72371900 | -1.15911300 | 0.02245100 | Br          | 2.90155600  | -0.00845300 | 0.01250500 |             |            |             |   |             |             |             |   |             |             |            |   |            |            |             |   |            |            |            |   |            |             |             |   |            |             |             |   |            |            |            |   |            |             |            |   |             |            |            |   |             |            |             |   |             |             |             |   |             |             |             |   |             |             |            |   |             |             |            |   |             |             |            |   |             |            |            |   |             |             |            |    |            |             |            |   |            |             |            |
| H                                                       | -1.42028300                                                                                                                                                                                                                                                                                                                                                                                                                                                                                                                                                                                                                                                                                                                                                                                                                                                                                                                                                                                                                                                                                                                                                                                                                                                                                                                                                                                                                                                                                                                                                                                                                                                                                                                                                                                                                                                                                                                                                                                                                                                                                                                                                            | -1.58256800                                                                                                                                                                                                                                                                                                                                                                                                                                                                                                                | 1.36017800  |             |             |            |            |             |             |            |             |             |             |            |             |             |             |            |             |             |             |            |             |             |             |            |             |            |             |   |             |             |             |   |             |             |            |   |            |            |             |   |            |            |            |   |            |             |             |   |            |             |             |   |            |            |            |   |            |             |            |   |             |            |            |   |             |            |             |   |             |             |             |   |             |             |             |   |             |             |            |   |             |             |            |   |             |             |            |   |             |            |            |   |             |             |            |    |            |             |            |   |            |             |            |
| H                                                       | -1.63029300                                                                                                                                                                                                                                                                                                                                                                                                                                                                                                                                                                                                                                                                                                                                                                                                                                                                                                                                                                                                                                                                                                                                                                                                                                                                                                                                                                                                                                                                                                                                                                                                                                                                                                                                                                                                                                                                                                                                                                                                                                                                                                                                                            | -0.01846900                                                                                                                                                                                                                                                                                                                                                                                                                                                                                                                | 2.12962800  |             |             |            |            |             |             |            |             |             |             |            |             |             |             |            |             |             |             |            |             |             |             |            |             |            |             |   |             |             |             |   |             |             |            |   |            |            |             |   |            |            |            |   |            |             |             |   |            |             |             |   |            |            |            |   |            |             |            |   |             |            |            |   |             |            |             |   |             |             |             |   |             |             |             |   |             |             |            |   |             |             |            |   |             |             |            |   |             |            |            |   |             |             |            |    |            |             |            |   |            |             |            |
| C                                                       | -3.23669600                                                                                                                                                                                                                                                                                                                                                                                                                                                                                                                                                                                                                                                                                                                                                                                                                                                                                                                                                                                                                                                                                                                                                                                                                                                                                                                                                                                                                                                                                                                                                                                                                                                                                                                                                                                                                                                                                                                                                                                                                                                                                                                                                            | -0.01012800                                                                                                                                                                                                                                                                                                                                                                                                                                                                                                                | 0.00145700  |             |             |            |            |             |             |            |             |             |             |            |             |             |             |            |             |             |             |            |             |             |             |            |             |            |             |   |             |             |             |   |             |             |            |   |            |            |             |   |            |            |            |   |            |             |             |   |            |             |             |   |            |            |            |   |            |             |            |   |             |            |            |   |             |            |             |   |             |             |             |   |             |             |             |   |             |             |            |   |             |             |            |   |             |             |            |   |             |            |            |   |             |             |            |    |            |             |            |   |            |             |            |
| O                                                       | -3.81473800                                                                                                                                                                                                                                                                                                                                                                                                                                                                                                                                                                                                                                                                                                                                                                                                                                                                                                                                                                                                                                                                                                                                                                                                                                                                                                                                                                                                                                                                                                                                                                                                                                                                                                                                                                                                                                                                                                                                                                                                                                                                                                                                                            | 1.09344900                                                                                                                                                                                                                                                                                                                                                                                                                                                                                                                 | 0.02736200  |             |             |            |            |             |             |            |             |             |             |            |             |             |             |            |             |             |             |            |             |             |             |            |             |            |             |   |             |             |             |   |             |             |            |   |            |            |             |   |            |            |            |   |            |             |             |   |            |             |             |   |            |            |            |   |            |             |            |   |             |            |            |   |             |            |             |   |             |             |             |   |             |             |             |   |             |             |            |   |             |             |            |   |             |             |            |   |             |            |            |   |             |             |            |    |            |             |            |   |            |             |            |
| O                                                       | -3.72371900                                                                                                                                                                                                                                                                                                                                                                                                                                                                                                                                                                                                                                                                                                                                                                                                                                                                                                                                                                                                                                                                                                                                                                                                                                                                                                                                                                                                                                                                                                                                                                                                                                                                                                                                                                                                                                                                                                                                                                                                                                                                                                                                                            | -1.15911300                                                                                                                                                                                                                                                                                                                                                                                                                                                                                                                | 0.02245100  |             |             |            |            |             |             |            |             |             |             |            |             |             |             |            |             |             |             |            |             |             |             |            |             |            |             |   |             |             |             |   |             |             |            |   |            |            |             |   |            |            |            |   |            |             |             |   |            |             |             |   |            |            |            |   |            |             |            |   |             |            |            |   |             |            |             |   |             |             |             |   |             |             |             |   |             |             |            |   |             |             |            |   |             |             |            |   |             |            |            |   |             |             |            |    |            |             |            |   |            |             |            |
| Br                                                      | 2.90155600                                                                                                                                                                                                                                                                                                                                                                                                                                                                                                                                                                                                                                                                                                                                                                                                                                                                                                                                                                                                                                                                                                                                                                                                                                                                                                                                                                                                                                                                                                                                                                                                                                                                                                                                                                                                                                                                                                                                                                                                                                                                                                                                                             | -0.00845300                                                                                                                                                                                                                                                                                                                                                                                                                                                                                                                | 0.01250500  |             |             |            |            |             |             |            |             |             |             |            |             |             |             |            |             |             |             |            |             |             |             |            |             |            |             |   |             |             |             |   |             |             |            |   |            |            |             |   |            |            |            |   |            |             |             |   |            |             |             |   |            |            |            |   |            |             |            |   |             |            |            |   |             |            |             |   |             |             |             |   |             |             |             |   |             |             |            |   |             |             |            |   |             |             |            |   |             |            |            |   |             |             |            |    |            |             |            |   |            |             |            |
|                                                         | <table> <tbody> <tr><td colspan="4"><b>3[CO<sub>2</sub><sup>-</sup>,C-Br]:F<sup>-</sup></b></td></tr> <tr><td>C</td><td>0.53774800</td><td>0.00718300</td><td>-0.00732300</td></tr> <tr><td>C</td><td>-2.08471300</td><td>0.02852000</td><td>-0.02563300</td></tr> <tr><td>C</td><td>0.01149700</td><td>1.38701800</td><td>-0.40539500</td></tr> <tr><td>C</td><td>0.00415200</td><td>-1.02310800</td><td>-1.00277200</td></tr> <tr><td>C</td><td>-0.00545900</td><td>-0.33762000</td><td>1.37969200</td></tr> <tr><td>C</td><td>-1.52365800</td><td>1.44140400</td><td>-0.19825500</td></tr> <tr><td>C</td><td>-1.52722600</td><td>-0.84572700</td><td>-1.15720300</td></tr> <tr><td>C</td><td>-1.54080900</td><td>-0.53272500</td><td>1.29861900</td></tr> <tr><td>H</td><td>0.27735000</td><td>1.56743400</td><td>-1.45028700</td></tr> <tr><td>H</td><td>0.52093000</td><td>2.14975700</td><td>0.18545500</td></tr> <tr><td>H</td><td>0.25258100</td><td>-2.02148400</td><td>-0.63391000</td></tr> <tr><td>H</td><td>0.51746800</td><td>-0.90095400</td><td>-1.95775400</td></tr> <tr><td>H</td><td>0.25622500</td><td>0.47277000</td><td>2.06447400</td></tr> <tr><td>H</td><td>0.49041000</td><td>-1.23742100</td><td>1.74730400</td></tr> <tr><td>H</td><td>-1.78071900</td><td>2.02879600</td><td>0.68515200</td></tr> <tr><td>H</td><td>-2.02291500</td><td>1.92574700</td><td>-1.03764600</td></tr> <tr><td>H</td><td>-1.75899300</td><td>-0.36628600</td><td>-2.11340700</td></tr> <tr><td>H</td><td>-2.04833100</td><td>-1.80224500</td><td>-1.13974000</td></tr> <tr><td>H</td><td>-1.81217800</td><td>-1.58816600</td><td>1.35522300</td></tr> <tr><td>H</td><td>-2.03823600</td><td>-0.03015600</td><td>2.13183300</td></tr> <tr><td>C</td><td>-3.64591200</td><td>-0.01441200</td><td>0.00559200</td></tr> <tr><td>O</td><td>-4.23919900</td><td>1.08567300</td><td>0.03189700</td></tr> <tr><td>O</td><td>-4.14692600</td><td>-1.16137000</td><td>0.02683600</td></tr> <tr><td>Br</td><td>2.50862800</td><td>-0.00216900</td><td>0.00509200</td></tr> <tr><td>F</td><td>5.23107900</td><td>-0.01994300</td><td>0.02125400</td></tr> </tbody> </table> | <b>3[CO<sub>2</sub><sup>-</sup>,C-Br]:F<sup>-</sup></b>                                                                                                                                                                                                                                                                                                                                                                                                                                                                    |             |             |             | C          | 0.53774800 | 0.00718300  | -0.00732300 | C          | -2.08471300 | 0.02852000  | -0.02563300 | C          | 0.01149700  | 1.38701800  | -0.40539500 | C          | 0.00415200  | -1.02310800 | -1.00277200 | C          | -0.00545900 | -0.33762000 | 1.37969200  | C          | -1.52365800 | 1.44140400 | -0.19825500 | C | -1.52722600 | -0.84572700 | -1.15720300 | C | -1.54080900 | -0.53272500 | 1.29861900 | H | 0.27735000 | 1.56743400 | -1.45028700 | H | 0.52093000 | 2.14975700 | 0.18545500 | H | 0.25258100 | -2.02148400 | -0.63391000 | H | 0.51746800 | -0.90095400 | -1.95775400 | H | 0.25622500 | 0.47277000 | 2.06447400 | H | 0.49041000 | -1.23742100 | 1.74730400 | H | -1.78071900 | 2.02879600 | 0.68515200 | H | -2.02291500 | 1.92574700 | -1.03764600 | H | -1.75899300 | -0.36628600 | -2.11340700 | H | -2.04833100 | -1.80224500 | -1.13974000 | H | -1.81217800 | -1.58816600 | 1.35522300 | H | -2.03823600 | -0.03015600 | 2.13183300 | C | -3.64591200 | -0.01441200 | 0.00559200 | O | -4.23919900 | 1.08567300 | 0.03189700 | O | -4.14692600 | -1.16137000 | 0.02683600 | Br | 2.50862800 | -0.00216900 | 0.00509200 | F | 5.23107900 | -0.01994300 | 0.02125400 |
| <b>3[CO<sub>2</sub><sup>-</sup>,C-Br]:F<sup>-</sup></b> |                                                                                                                                                                                                                                                                                                                                                                                                                                                                                                                                                                                                                                                                                                                                                                                                                                                                                                                                                                                                                                                                                                                                                                                                                                                                                                                                                                                                                                                                                                                                                                                                                                                                                                                                                                                                                                                                                                                                                                                                                                                                                                                                                                        |                                                                                                                                                                                                                                                                                                                                                                                                                                                                                                                            |             |             |             |            |            |             |             |            |             |             |             |            |             |             |             |            |             |             |             |            |             |             |             |            |             |            |             |   |             |             |             |   |             |             |            |   |            |            |             |   |            |            |            |   |            |             |             |   |            |             |             |   |            |            |            |   |            |             |            |   |             |            |            |   |             |            |             |   |             |             |             |   |             |             |             |   |             |             |            |   |             |             |            |   |             |             |            |   |             |            |            |   |             |             |            |    |            |             |            |   |            |             |            |
| C                                                       | 0.53774800                                                                                                                                                                                                                                                                                                                                                                                                                                                                                                                                                                                                                                                                                                                                                                                                                                                                                                                                                                                                                                                                                                                                                                                                                                                                                                                                                                                                                                                                                                                                                                                                                                                                                                                                                                                                                                                                                                                                                                                                                                                                                                                                                             | 0.00718300                                                                                                                                                                                                                                                                                                                                                                                                                                                                                                                 | -0.00732300 |             |             |            |            |             |             |            |             |             |             |            |             |             |             |            |             |             |             |            |             |             |             |            |             |            |             |   |             |             |             |   |             |             |            |   |            |            |             |   |            |            |            |   |            |             |             |   |            |             |             |   |            |            |            |   |            |             |            |   |             |            |            |   |             |            |             |   |             |             |             |   |             |             |             |   |             |             |            |   |             |             |            |   |             |             |            |   |             |            |            |   |             |             |            |    |            |             |            |   |            |             |            |
| C                                                       | -2.08471300                                                                                                                                                                                                                                                                                                                                                                                                                                                                                                                                                                                                                                                                                                                                                                                                                                                                                                                                                                                                                                                                                                                                                                                                                                                                                                                                                                                                                                                                                                                                                                                                                                                                                                                                                                                                                                                                                                                                                                                                                                                                                                                                                            | 0.02852000                                                                                                                                                                                                                                                                                                                                                                                                                                                                                                                 | -0.02563300 |             |             |            |            |             |             |            |             |             |             |            |             |             |             |            |             |             |             |            |             |             |             |            |             |            |             |   |             |             |             |   |             |             |            |   |            |            |             |   |            |            |            |   |            |             |             |   |            |             |             |   |            |            |            |   |            |             |            |   |             |            |            |   |             |            |             |   |             |             |             |   |             |             |             |   |             |             |            |   |             |             |            |   |             |             |            |   |             |            |            |   |             |             |            |    |            |             |            |   |            |             |            |
| C                                                       | 0.01149700                                                                                                                                                                                                                                                                                                                                                                                                                                                                                                                                                                                                                                                                                                                                                                                                                                                                                                                                                                                                                                                                                                                                                                                                                                                                                                                                                                                                                                                                                                                                                                                                                                                                                                                                                                                                                                                                                                                                                                                                                                                                                                                                                             | 1.38701800                                                                                                                                                                                                                                                                                                                                                                                                                                                                                                                 | -0.40539500 |             |             |            |            |             |             |            |             |             |             |            |             |             |             |            |             |             |             |            |             |             |             |            |             |            |             |   |             |             |             |   |             |             |            |   |            |            |             |   |            |            |            |   |            |             |             |   |            |             |             |   |            |            |            |   |            |             |            |   |             |            |            |   |             |            |             |   |             |             |             |   |             |             |             |   |             |             |            |   |             |             |            |   |             |             |            |   |             |            |            |   |             |             |            |    |            |             |            |   |            |             |            |
| C                                                       | 0.00415200                                                                                                                                                                                                                                                                                                                                                                                                                                                                                                                                                                                                                                                                                                                                                                                                                                                                                                                                                                                                                                                                                                                                                                                                                                                                                                                                                                                                                                                                                                                                                                                                                                                                                                                                                                                                                                                                                                                                                                                                                                                                                                                                                             | -1.02310800                                                                                                                                                                                                                                                                                                                                                                                                                                                                                                                | -1.00277200 |             |             |            |            |             |             |            |             |             |             |            |             |             |             |            |             |             |             |            |             |             |             |            |             |            |             |   |             |             |             |   |             |             |            |   |            |            |             |   |            |            |            |   |            |             |             |   |            |             |             |   |            |            |            |   |            |             |            |   |             |            |            |   |             |            |             |   |             |             |             |   |             |             |             |   |             |             |            |   |             |             |            |   |             |             |            |   |             |            |            |   |             |             |            |    |            |             |            |   |            |             |            |
| C                                                       | -0.00545900                                                                                                                                                                                                                                                                                                                                                                                                                                                                                                                                                                                                                                                                                                                                                                                                                                                                                                                                                                                                                                                                                                                                                                                                                                                                                                                                                                                                                                                                                                                                                                                                                                                                                                                                                                                                                                                                                                                                                                                                                                                                                                                                                            | -0.33762000                                                                                                                                                                                                                                                                                                                                                                                                                                                                                                                | 1.37969200  |             |             |            |            |             |             |            |             |             |             |            |             |             |             |            |             |             |             |            |             |             |             |            |             |            |             |   |             |             |             |   |             |             |            |   |            |            |             |   |            |            |            |   |            |             |             |   |            |             |             |   |            |            |            |   |            |             |            |   |             |            |            |   |             |            |             |   |             |             |             |   |             |             |             |   |             |             |            |   |             |             |            |   |             |             |            |   |             |            |            |   |             |             |            |    |            |             |            |   |            |             |            |
| C                                                       | -1.52365800                                                                                                                                                                                                                                                                                                                                                                                                                                                                                                                                                                                                                                                                                                                                                                                                                                                                                                                                                                                                                                                                                                                                                                                                                                                                                                                                                                                                                                                                                                                                                                                                                                                                                                                                                                                                                                                                                                                                                                                                                                                                                                                                                            | 1.44140400                                                                                                                                                                                                                                                                                                                                                                                                                                                                                                                 | -0.19825500 |             |             |            |            |             |             |            |             |             |             |            |             |             |             |            |             |             |             |            |             |             |             |            |             |            |             |   |             |             |             |   |             |             |            |   |            |            |             |   |            |            |            |   |            |             |             |   |            |             |             |   |            |            |            |   |            |             |            |   |             |            |            |   |             |            |             |   |             |             |             |   |             |             |             |   |             |             |            |   |             |             |            |   |             |             |            |   |             |            |            |   |             |             |            |    |            |             |            |   |            |             |            |
| C                                                       | -1.52722600                                                                                                                                                                                                                                                                                                                                                                                                                                                                                                                                                                                                                                                                                                                                                                                                                                                                                                                                                                                                                                                                                                                                                                                                                                                                                                                                                                                                                                                                                                                                                                                                                                                                                                                                                                                                                                                                                                                                                                                                                                                                                                                                                            | -0.84572700                                                                                                                                                                                                                                                                                                                                                                                                                                                                                                                | -1.15720300 |             |             |            |            |             |             |            |             |             |             |            |             |             |             |            |             |             |             |            |             |             |             |            |             |            |             |   |             |             |             |   |             |             |            |   |            |            |             |   |            |            |            |   |            |             |             |   |            |             |             |   |            |            |            |   |            |             |            |   |             |            |            |   |             |            |             |   |             |             |             |   |             |             |             |   |             |             |            |   |             |             |            |   |             |             |            |   |             |            |            |   |             |             |            |    |            |             |            |   |            |             |            |
| C                                                       | -1.54080900                                                                                                                                                                                                                                                                                                                                                                                                                                                                                                                                                                                                                                                                                                                                                                                                                                                                                                                                                                                                                                                                                                                                                                                                                                                                                                                                                                                                                                                                                                                                                                                                                                                                                                                                                                                                                                                                                                                                                                                                                                                                                                                                                            | -0.53272500                                                                                                                                                                                                                                                                                                                                                                                                                                                                                                                | 1.29861900  |             |             |            |            |             |             |            |             |             |             |            |             |             |             |            |             |             |             |            |             |             |             |            |             |            |             |   |             |             |             |   |             |             |            |   |            |            |             |   |            |            |            |   |            |             |             |   |            |             |             |   |            |            |            |   |            |             |            |   |             |            |            |   |             |            |             |   |             |             |             |   |             |             |             |   |             |             |            |   |             |             |            |   |             |             |            |   |             |            |            |   |             |             |            |    |            |             |            |   |            |             |            |
| H                                                       | 0.27735000                                                                                                                                                                                                                                                                                                                                                                                                                                                                                                                                                                                                                                                                                                                                                                                                                                                                                                                                                                                                                                                                                                                                                                                                                                                                                                                                                                                                                                                                                                                                                                                                                                                                                                                                                                                                                                                                                                                                                                                                                                                                                                                                                             | 1.56743400                                                                                                                                                                                                                                                                                                                                                                                                                                                                                                                 | -1.45028700 |             |             |            |            |             |             |            |             |             |             |            |             |             |             |            |             |             |             |            |             |             |             |            |             |            |             |   |             |             |             |   |             |             |            |   |            |            |             |   |            |            |            |   |            |             |             |   |            |             |             |   |            |            |            |   |            |             |            |   |             |            |            |   |             |            |             |   |             |             |             |   |             |             |             |   |             |             |            |   |             |             |            |   |             |             |            |   |             |            |            |   |             |             |            |    |            |             |            |   |            |             |            |
| H                                                       | 0.52093000                                                                                                                                                                                                                                                                                                                                                                                                                                                                                                                                                                                                                                                                                                                                                                                                                                                                                                                                                                                                                                                                                                                                                                                                                                                                                                                                                                                                                                                                                                                                                                                                                                                                                                                                                                                                                                                                                                                                                                                                                                                                                                                                                             | 2.14975700                                                                                                                                                                                                                                                                                                                                                                                                                                                                                                                 | 0.18545500  |             |             |            |            |             |             |            |             |             |             |            |             |             |             |            |             |             |             |            |             |             |             |            |             |            |             |   |             |             |             |   |             |             |            |   |            |            |             |   |            |            |            |   |            |             |             |   |            |             |             |   |            |            |            |   |            |             |            |   |             |            |            |   |             |            |             |   |             |             |             |   |             |             |             |   |             |             |            |   |             |             |            |   |             |             |            |   |             |            |            |   |             |             |            |    |            |             |            |   |            |             |            |
| H                                                       | 0.25258100                                                                                                                                                                                                                                                                                                                                                                                                                                                                                                                                                                                                                                                                                                                                                                                                                                                                                                                                                                                                                                                                                                                                                                                                                                                                                                                                                                                                                                                                                                                                                                                                                                                                                                                                                                                                                                                                                                                                                                                                                                                                                                                                                             | -2.02148400                                                                                                                                                                                                                                                                                                                                                                                                                                                                                                                | -0.63391000 |             |             |            |            |             |             |            |             |             |             |            |             |             |             |            |             |             |             |            |             |             |             |            |             |            |             |   |             |             |             |   |             |             |            |   |            |            |             |   |            |            |            |   |            |             |             |   |            |             |             |   |            |            |            |   |            |             |            |   |             |            |            |   |             |            |             |   |             |             |             |   |             |             |             |   |             |             |            |   |             |             |            |   |             |             |            |   |             |            |            |   |             |             |            |    |            |             |            |   |            |             |            |
| H                                                       | 0.51746800                                                                                                                                                                                                                                                                                                                                                                                                                                                                                                                                                                                                                                                                                                                                                                                                                                                                                                                                                                                                                                                                                                                                                                                                                                                                                                                                                                                                                                                                                                                                                                                                                                                                                                                                                                                                                                                                                                                                                                                                                                                                                                                                                             | -0.90095400                                                                                                                                                                                                                                                                                                                                                                                                                                                                                                                | -1.95775400 |             |             |            |            |             |             |            |             |             |             |            |             |             |             |            |             |             |             |            |             |             |             |            |             |            |             |   |             |             |             |   |             |             |            |   |            |            |             |   |            |            |            |   |            |             |             |   |            |             |             |   |            |            |            |   |            |             |            |   |             |            |            |   |             |            |             |   |             |             |             |   |             |             |             |   |             |             |            |   |             |             |            |   |             |             |            |   |             |            |            |   |             |             |            |    |            |             |            |   |            |             |            |
| H                                                       | 0.25622500                                                                                                                                                                                                                                                                                                                                                                                                                                                                                                                                                                                                                                                                                                                                                                                                                                                                                                                                                                                                                                                                                                                                                                                                                                                                                                                                                                                                                                                                                                                                                                                                                                                                                                                                                                                                                                                                                                                                                                                                                                                                                                                                                             | 0.47277000                                                                                                                                                                                                                                                                                                                                                                                                                                                                                                                 | 2.06447400  |             |             |            |            |             |             |            |             |             |             |            |             |             |             |            |             |             |             |            |             |             |             |            |             |            |             |   |             |             |             |   |             |             |            |   |            |            |             |   |            |            |            |   |            |             |             |   |            |             |             |   |            |            |            |   |            |             |            |   |             |            |            |   |             |            |             |   |             |             |             |   |             |             |             |   |             |             |            |   |             |             |            |   |             |             |            |   |             |            |            |   |             |             |            |    |            |             |            |   |            |             |            |
| H                                                       | 0.49041000                                                                                                                                                                                                                                                                                                                                                                                                                                                                                                                                                                                                                                                                                                                                                                                                                                                                                                                                                                                                                                                                                                                                                                                                                                                                                                                                                                                                                                                                                                                                                                                                                                                                                                                                                                                                                                                                                                                                                                                                                                                                                                                                                             | -1.23742100                                                                                                                                                                                                                                                                                                                                                                                                                                                                                                                | 1.74730400  |             |             |            |            |             |             |            |             |             |             |            |             |             |             |            |             |             |             |            |             |             |             |            |             |            |             |   |             |             |             |   |             |             |            |   |            |            |             |   |            |            |            |   |            |             |             |   |            |             |             |   |            |            |            |   |            |             |            |   |             |            |            |   |             |            |             |   |             |             |             |   |             |             |             |   |             |             |            |   |             |             |            |   |             |             |            |   |             |            |            |   |             |             |            |    |            |             |            |   |            |             |            |
| H                                                       | -1.78071900                                                                                                                                                                                                                                                                                                                                                                                                                                                                                                                                                                                                                                                                                                                                                                                                                                                                                                                                                                                                                                                                                                                                                                                                                                                                                                                                                                                                                                                                                                                                                                                                                                                                                                                                                                                                                                                                                                                                                                                                                                                                                                                                                            | 2.02879600                                                                                                                                                                                                                                                                                                                                                                                                                                                                                                                 | 0.68515200  |             |             |            |            |             |             |            |             |             |             |            |             |             |             |            |             |             |             |            |             |             |             |            |             |            |             |   |             |             |             |   |             |             |            |   |            |            |             |   |            |            |            |   |            |             |             |   |            |             |             |   |            |            |            |   |            |             |            |   |             |            |            |   |             |            |             |   |             |             |             |   |             |             |             |   |             |             |            |   |             |             |            |   |             |             |            |   |             |            |            |   |             |             |            |    |            |             |            |   |            |             |            |
| H                                                       | -2.02291500                                                                                                                                                                                                                                                                                                                                                                                                                                                                                                                                                                                                                                                                                                                                                                                                                                                                                                                                                                                                                                                                                                                                                                                                                                                                                                                                                                                                                                                                                                                                                                                                                                                                                                                                                                                                                                                                                                                                                                                                                                                                                                                                                            | 1.92574700                                                                                                                                                                                                                                                                                                                                                                                                                                                                                                                 | -1.03764600 |             |             |            |            |             |             |            |             |             |             |            |             |             |             |            |             |             |             |            |             |             |             |            |             |            |             |   |             |             |             |   |             |             |            |   |            |            |             |   |            |            |            |   |            |             |             |   |            |             |             |   |            |            |            |   |            |             |            |   |             |            |            |   |             |            |             |   |             |             |             |   |             |             |             |   |             |             |            |   |             |             |            |   |             |             |            |   |             |            |            |   |             |             |            |    |            |             |            |   |            |             |            |
| H                                                       | -1.75899300                                                                                                                                                                                                                                                                                                                                                                                                                                                                                                                                                                                                                                                                                                                                                                                                                                                                                                                                                                                                                                                                                                                                                                                                                                                                                                                                                                                                                                                                                                                                                                                                                                                                                                                                                                                                                                                                                                                                                                                                                                                                                                                                                            | -0.36628600                                                                                                                                                                                                                                                                                                                                                                                                                                                                                                                | -2.11340700 |             |             |            |            |             |             |            |             |             |             |            |             |             |             |            |             |             |             |            |             |             |             |            |             |            |             |   |             |             |             |   |             |             |            |   |            |            |             |   |            |            |            |   |            |             |             |   |            |             |             |   |            |            |            |   |            |             |            |   |             |            |            |   |             |            |             |   |             |             |             |   |             |             |             |   |             |             |            |   |             |             |            |   |             |             |            |   |             |            |            |   |             |             |            |    |            |             |            |   |            |             |            |
| H                                                       | -2.04833100                                                                                                                                                                                                                                                                                                                                                                                                                                                                                                                                                                                                                                                                                                                                                                                                                                                                                                                                                                                                                                                                                                                                                                                                                                                                                                                                                                                                                                                                                                                                                                                                                                                                                                                                                                                                                                                                                                                                                                                                                                                                                                                                                            | -1.80224500                                                                                                                                                                                                                                                                                                                                                                                                                                                                                                                | -1.13974000 |             |             |            |            |             |             |            |             |             |             |            |             |             |             |            |             |             |             |            |             |             |             |            |             |            |             |   |             |             |             |   |             |             |            |   |            |            |             |   |            |            |            |   |            |             |             |   |            |             |             |   |            |            |            |   |            |             |            |   |             |            |            |   |             |            |             |   |             |             |             |   |             |             |             |   |             |             |            |   |             |             |            |   |             |             |            |   |             |            |            |   |             |             |            |    |            |             |            |   |            |             |            |
| H                                                       | -1.81217800                                                                                                                                                                                                                                                                                                                                                                                                                                                                                                                                                                                                                                                                                                                                                                                                                                                                                                                                                                                                                                                                                                                                                                                                                                                                                                                                                                                                                                                                                                                                                                                                                                                                                                                                                                                                                                                                                                                                                                                                                                                                                                                                                            | -1.58816600                                                                                                                                                                                                                                                                                                                                                                                                                                                                                                                | 1.35522300  |             |             |            |            |             |             |            |             |             |             |            |             |             |             |            |             |             |             |            |             |             |             |            |             |            |             |   |             |             |             |   |             |             |            |   |            |            |             |   |            |            |            |   |            |             |             |   |            |             |             |   |            |            |            |   |            |             |            |   |             |            |            |   |             |            |             |   |             |             |             |   |             |             |             |   |             |             |            |   |             |             |            |   |             |             |            |   |             |            |            |   |             |             |            |    |            |             |            |   |            |             |            |
| H                                                       | -2.03823600                                                                                                                                                                                                                                                                                                                                                                                                                                                                                                                                                                                                                                                                                                                                                                                                                                                                                                                                                                                                                                                                                                                                                                                                                                                                                                                                                                                                                                                                                                                                                                                                                                                                                                                                                                                                                                                                                                                                                                                                                                                                                                                                                            | -0.03015600                                                                                                                                                                                                                                                                                                                                                                                                                                                                                                                | 2.13183300  |             |             |            |            |             |             |            |             |             |             |            |             |             |             |            |             |             |             |            |             |             |             |            |             |            |             |   |             |             |             |   |             |             |            |   |            |            |             |   |            |            |            |   |            |             |             |   |            |             |             |   |            |            |            |   |            |             |            |   |             |            |            |   |             |            |             |   |             |             |             |   |             |             |             |   |             |             |            |   |             |             |            |   |             |             |            |   |             |            |            |   |             |             |            |    |            |             |            |   |            |             |            |
| C                                                       | -3.64591200                                                                                                                                                                                                                                                                                                                                                                                                                                                                                                                                                                                                                                                                                                                                                                                                                                                                                                                                                                                                                                                                                                                                                                                                                                                                                                                                                                                                                                                                                                                                                                                                                                                                                                                                                                                                                                                                                                                                                                                                                                                                                                                                                            | -0.01441200                                                                                                                                                                                                                                                                                                                                                                                                                                                                                                                | 0.00559200  |             |             |            |            |             |             |            |             |             |             |            |             |             |             |            |             |             |             |            |             |             |             |            |             |            |             |   |             |             |             |   |             |             |            |   |            |            |             |   |            |            |            |   |            |             |             |   |            |             |             |   |            |            |            |   |            |             |            |   |             |            |            |   |             |            |             |   |             |             |             |   |             |             |             |   |             |             |            |   |             |             |            |   |             |             |            |   |             |            |            |   |             |             |            |    |            |             |            |   |            |             |            |
| O                                                       | -4.23919900                                                                                                                                                                                                                                                                                                                                                                                                                                                                                                                                                                                                                                                                                                                                                                                                                                                                                                                                                                                                                                                                                                                                                                                                                                                                                                                                                                                                                                                                                                                                                                                                                                                                                                                                                                                                                                                                                                                                                                                                                                                                                                                                                            | 1.08567300                                                                                                                                                                                                                                                                                                                                                                                                                                                                                                                 | 0.03189700  |             |             |            |            |             |             |            |             |             |             |            |             |             |             |            |             |             |             |            |             |             |             |            |             |            |             |   |             |             |             |   |             |             |            |   |            |            |             |   |            |            |            |   |            |             |             |   |            |             |             |   |            |            |            |   |            |             |            |   |             |            |            |   |             |            |             |   |             |             |             |   |             |             |             |   |             |             |            |   |             |             |            |   |             |             |            |   |             |            |            |   |             |             |            |    |            |             |            |   |            |             |            |
| O                                                       | -4.14692600                                                                                                                                                                                                                                                                                                                                                                                                                                                                                                                                                                                                                                                                                                                                                                                                                                                                                                                                                                                                                                                                                                                                                                                                                                                                                                                                                                                                                                                                                                                                                                                                                                                                                                                                                                                                                                                                                                                                                                                                                                                                                                                                                            | -1.16137000                                                                                                                                                                                                                                                                                                                                                                                                                                                                                                                | 0.02683600  |             |             |            |            |             |             |            |             |             |             |            |             |             |             |            |             |             |             |            |             |             |             |            |             |            |             |   |             |             |             |   |             |             |            |   |            |            |             |   |            |            |            |   |            |             |             |   |            |             |             |   |            |            |            |   |            |             |            |   |             |            |            |   |             |            |             |   |             |             |             |   |             |             |             |   |             |             |            |   |             |             |            |   |             |             |            |   |             |            |            |   |             |             |            |    |            |             |            |   |            |             |            |
| Br                                                      | 2.50862800                                                                                                                                                                                                                                                                                                                                                                                                                                                                                                                                                                                                                                                                                                                                                                                                                                                                                                                                                                                                                                                                                                                                                                                                                                                                                                                                                                                                                                                                                                                                                                                                                                                                                                                                                                                                                                                                                                                                                                                                                                                                                                                                                             | -0.00216900                                                                                                                                                                                                                                                                                                                                                                                                                                                                                                                | 0.00509200  |             |             |            |            |             |             |            |             |             |             |            |             |             |             |            |             |             |             |            |             |             |             |            |             |            |             |   |             |             |             |   |             |             |            |   |            |            |             |   |            |            |            |   |            |             |             |   |            |             |             |   |            |            |            |   |            |             |            |   |             |            |            |   |             |            |             |   |             |             |             |   |             |             |             |   |             |             |            |   |             |             |            |   |             |             |            |   |             |            |            |   |             |             |            |    |            |             |            |   |            |             |            |
| F                                                       | 5.23107900                                                                                                                                                                                                                                                                                                                                                                                                                                                                                                                                                                                                                                                                                                                                                                                                                                                                                                                                                                                                                                                                                                                                                                                                                                                                                                                                                                                                                                                                                                                                                                                                                                                                                                                                                                                                                                                                                                                                                                                                                                                                                                                                                             | -0.01994300                                                                                                                                                                                                                                                                                                                                                                                                                                                                                                                | 0.02125400  |             |             |            |            |             |             |            |             |             |             |            |             |             |             |            |             |             |             |            |             |             |             |            |             |            |             |   |             |             |             |   |             |             |            |   |            |            |             |   |            |            |            |   |            |             |             |   |            |             |             |   |            |            |            |   |            |             |            |   |             |            |            |   |             |            |             |   |             |             |             |   |             |             |             |   |             |             |            |   |             |             |            |   |             |             |            |   |             |            |            |   |             |             |            |    |            |             |            |   |            |             |            |
|                                                         | <table> <tbody> <tr><td colspan="4"><b>3[CO<sub>2</sub><sup>-</sup>,C-I]</b></td></tr> <tr><td>C</td><td>0.43362800</td><td>0.00752700</td><td>-0.00628800</td></tr> <tr><td>C</td><td>-2.14165300</td><td>0.03091500</td><td>-0.02680400</td></tr> <tr><td>C</td><td>-0.04880400</td><td>1.39967900</td><td>-0.39536100</td></tr> <tr><td>C</td><td>-0.05733700</td><td>-1.02061100</td><td>-1.01704100</td></tr> <tr><td>C</td><td>-0.06870400</td><td>-0.35195100</td><td>1.38589500</td></tr> <tr><td>C</td><td>-1.58861700</td><td>1.44519000</td><td>-0.19515900</td></tr> <tr><td>C</td><td>-1.59259100</td><td>-0.84192300</td><td>-1.15997300</td></tr> <tr><td>C</td><td>-1.60831400</td><td>-0.53449300</td><td>1.29697800</td></tr> <tr><td>H</td><td>0.22179200</td><td>1.58850900</td><td>-1.43630500</td></tr> <tr><td>H</td><td>0.45083600</td><td>2.15442900</td><td>0.21230300</td></tr> <tr><td>H</td><td>0.19536900</td><td>-2.02063600</td><td>-0.65903000</td></tr> <tr><td>H</td><td>0.44672600</td><td>-0.87881600</td><td>-1.97295100</td></tr> <tr><td>H</td><td>0.19734900</td><td>0.44893400</td><td>2.07849900</td></tr> <tr><td>H</td><td>0.41649200</td><td>-1.26292600</td><td>1.73657000</td></tr> <tr><td>H</td><td>-1.84893000</td><td>2.03331400</td><td>0.68507500</td></tr> <tr><td>H</td><td>-2.07797600</td><td>1.92750600</td><td>-1.03983700</td></tr> <tr><td>H</td><td>-1.82640400</td><td>-0.36790600</td><td>-2.11649600</td></tr> <tr><td>H</td><td>-2.10687600</td><td>-1.80098700</td><td>-1.13427900</td></tr> <tr><td>H</td><td>-1.88435600</td><td>-1.58746800</td><td>1.35448700</td></tr> <tr><td>H</td><td>-2.09606700</td><td>-0.02626000</td><td>2.13038400</td></tr> <tr><td>C</td><td>-3.70534300</td><td>-0.01307300</td><td>0.00279900</td></tr> <tr><td>O</td><td>-4.28522100</td><td>1.08940600</td><td>0.02878300</td></tr> <tr><td>O</td><td>-4.18955200</td><td>-1.16315400</td><td>0.02332300</td></tr> <tr><td>I</td><td>2.64106900</td><td>-0.00651500</td><td>0.00819700</td></tr> </tbody> </table>                                                                                             | <b>3[CO<sub>2</sub><sup>-</sup>,C-I]</b>                                                                                                                                                                                                                                                                                                                                                                                                                                                                                   |             |             |             | C          | 0.43362800 | 0.00752700  | -0.00628800 | C          | -2.14165300 | 0.03091500  | -0.02680400 | C          | -0.04880400 | 1.39967900  | -0.39536100 | C          | -0.05733700 | -1.02061100 | -1.01704100 | C          | -0.06870400 | -0.35195100 | 1.38589500  | C          | -1.58861700 | 1.44519000 | -0.19515900 | C | -1.59259100 | -0.84192300 | -1.15997300 | C | -1.60831400 | -0.53449300 | 1.29697800 | H | 0.22179200 | 1.58850900 | -1.43630500 | H | 0.45083600 | 2.15442900 | 0.21230300 | H | 0.19536900 | -2.02063600 | -0.65903000 | H | 0.44672600 | -0.87881600 | -1.97295100 | H | 0.19734900 | 0.44893400 | 2.07849900 | H | 0.41649200 | -1.26292600 | 1.73657000 | H | -1.84893000 | 2.03331400 | 0.68507500 | H | -2.07797600 | 1.92750600 | -1.03983700 | H | -1.82640400 | -0.36790600 | -2.11649600 | H | -2.10687600 | -1.80098700 | -1.13427900 | H | -1.88435600 | -1.58746800 | 1.35448700 | H | -2.09606700 | -0.02626000 | 2.13038400 | C | -3.70534300 | -0.01307300 | 0.00279900 | O | -4.28522100 | 1.08940600 | 0.02878300 | O | -4.18955200 | -1.16315400 | 0.02332300 | I  | 2.64106900 | -0.00651500 | 0.00819700 |   |            |             |            |
| <b>3[CO<sub>2</sub><sup>-</sup>,C-I]</b>                |                                                                                                                                                                                                                                                                                                                                                                                                                                                                                                                                                                                                                                                                                                                                                                                                                                                                                                                                                                                                                                                                                                                                                                                                                                                                                                                                                                                                                                                                                                                                                                                                                                                                                                                                                                                                                                                                                                                                                                                                                                                                                                                                                                        |                                                                                                                                                                                                                                                                                                                                                                                                                                                                                                                            |             |             |             |            |            |             |             |            |             |             |             |            |             |             |             |            |             |             |             |            |             |             |             |            |             |            |             |   |             |             |             |   |             |             |            |   |            |            |             |   |            |            |            |   |            |             |             |   |            |             |             |   |            |            |            |   |            |             |            |   |             |            |            |   |             |            |             |   |             |             |             |   |             |             |             |   |             |             |            |   |             |             |            |   |             |             |            |   |             |            |            |   |             |             |            |    |            |             |            |   |            |             |            |
| C                                                       | 0.43362800                                                                                                                                                                                                                                                                                                                                                                                                                                                                                                                                                                                                                                                                                                                                                                                                                                                                                                                                                                                                                                                                                                                                                                                                                                                                                                                                                                                                                                                                                                                                                                                                                                                                                                                                                                                                                                                                                                                                                                                                                                                                                                                                                             | 0.00752700                                                                                                                                                                                                                                                                                                                                                                                                                                                                                                                 | -0.00628800 |             |             |            |            |             |             |            |             |             |             |            |             |             |             |            |             |             |             |            |             |             |             |            |             |            |             |   |             |             |             |   |             |             |            |   |            |            |             |   |            |            |            |   |            |             |             |   |            |             |             |   |            |            |            |   |            |             |            |   |             |            |            |   |             |            |             |   |             |             |             |   |             |             |             |   |             |             |            |   |             |             |            |   |             |             |            |   |             |            |            |   |             |             |            |    |            |             |            |   |            |             |            |
| C                                                       | -2.14165300                                                                                                                                                                                                                                                                                                                                                                                                                                                                                                                                                                                                                                                                                                                                                                                                                                                                                                                                                                                                                                                                                                                                                                                                                                                                                                                                                                                                                                                                                                                                                                                                                                                                                                                                                                                                                                                                                                                                                                                                                                                                                                                                                            | 0.03091500                                                                                                                                                                                                                                                                                                                                                                                                                                                                                                                 | -0.02680400 |             |             |            |            |             |             |            |             |             |             |            |             |             |             |            |             |             |             |            |             |             |             |            |             |            |             |   |             |             |             |   |             |             |            |   |            |            |             |   |            |            |            |   |            |             |             |   |            |             |             |   |            |            |            |   |            |             |            |   |             |            |            |   |             |            |             |   |             |             |             |   |             |             |             |   |             |             |            |   |             |             |            |   |             |             |            |   |             |            |            |   |             |             |            |    |            |             |            |   |            |             |            |
| C                                                       | -0.04880400                                                                                                                                                                                                                                                                                                                                                                                                                                                                                                                                                                                                                                                                                                                                                                                                                                                                                                                                                                                                                                                                                                                                                                                                                                                                                                                                                                                                                                                                                                                                                                                                                                                                                                                                                                                                                                                                                                                                                                                                                                                                                                                                                            | 1.39967900                                                                                                                                                                                                                                                                                                                                                                                                                                                                                                                 | -0.39536100 |             |             |            |            |             |             |            |             |             |             |            |             |             |             |            |             |             |             |            |             |             |             |            |             |            |             |   |             |             |             |   |             |             |            |   |            |            |             |   |            |            |            |   |            |             |             |   |            |             |             |   |            |            |            |   |            |             |            |   |             |            |            |   |             |            |             |   |             |             |             |   |             |             |             |   |             |             |            |   |             |             |            |   |             |             |            |   |             |            |            |   |             |             |            |    |            |             |            |   |            |             |            |
| C                                                       | -0.05733700                                                                                                                                                                                                                                                                                                                                                                                                                                                                                                                                                                                                                                                                                                                                                                                                                                                                                                                                                                                                                                                                                                                                                                                                                                                                                                                                                                                                                                                                                                                                                                                                                                                                                                                                                                                                                                                                                                                                                                                                                                                                                                                                                            | -1.02061100                                                                                                                                                                                                                                                                                                                                                                                                                                                                                                                | -1.01704100 |             |             |            |            |             |             |            |             |             |             |            |             |             |             |            |             |             |             |            |             |             |             |            |             |            |             |   |             |             |             |   |             |             |            |   |            |            |             |   |            |            |            |   |            |             |             |   |            |             |             |   |            |            |            |   |            |             |            |   |             |            |            |   |             |            |             |   |             |             |             |   |             |             |             |   |             |             |            |   |             |             |            |   |             |             |            |   |             |            |            |   |             |             |            |    |            |             |            |   |            |             |            |
| C                                                       | -0.06870400                                                                                                                                                                                                                                                                                                                                                                                                                                                                                                                                                                                                                                                                                                                                                                                                                                                                                                                                                                                                                                                                                                                                                                                                                                                                                                                                                                                                                                                                                                                                                                                                                                                                                                                                                                                                                                                                                                                                                                                                                                                                                                                                                            | -0.35195100                                                                                                                                                                                                                                                                                                                                                                                                                                                                                                                | 1.38589500  |             |             |            |            |             |             |            |             |             |             |            |             |             |             |            |             |             |             |            |             |             |             |            |             |            |             |   |             |             |             |   |             |             |            |   |            |            |             |   |            |            |            |   |            |             |             |   |            |             |             |   |            |            |            |   |            |             |            |   |             |            |            |   |             |            |             |   |             |             |             |   |             |             |             |   |             |             |            |   |             |             |            |   |             |             |            |   |             |            |            |   |             |             |            |    |            |             |            |   |            |             |            |
| C                                                       | -1.58861700                                                                                                                                                                                                                                                                                                                                                                                                                                                                                                                                                                                                                                                                                                                                                                                                                                                                                                                                                                                                                                                                                                                                                                                                                                                                                                                                                                                                                                                                                                                                                                                                                                                                                                                                                                                                                                                                                                                                                                                                                                                                                                                                                            | 1.44519000                                                                                                                                                                                                                                                                                                                                                                                                                                                                                                                 | -0.19515900 |             |             |            |            |             |             |            |             |             |             |            |             |             |             |            |             |             |             |            |             |             |             |            |             |            |             |   |             |             |             |   |             |             |            |   |            |            |             |   |            |            |            |   |            |             |             |   |            |             |             |   |            |            |            |   |            |             |            |   |             |            |            |   |             |            |             |   |             |             |             |   |             |             |             |   |             |             |            |   |             |             |            |   |             |             |            |   |             |            |            |   |             |             |            |    |            |             |            |   |            |             |            |
| C                                                       | -1.59259100                                                                                                                                                                                                                                                                                                                                                                                                                                                                                                                                                                                                                                                                                                                                                                                                                                                                                                                                                                                                                                                                                                                                                                                                                                                                                                                                                                                                                                                                                                                                                                                                                                                                                                                                                                                                                                                                                                                                                                                                                                                                                                                                                            | -0.84192300                                                                                                                                                                                                                                                                                                                                                                                                                                                                                                                | -1.15997300 |             |             |            |            |             |             |            |             |             |             |            |             |             |             |            |             |             |             |            |             |             |             |            |             |            |             |   |             |             |             |   |             |             |            |   |            |            |             |   |            |            |            |   |            |             |             |   |            |             |             |   |            |            |            |   |            |             |            |   |             |            |            |   |             |            |             |   |             |             |             |   |             |             |             |   |             |             |            |   |             |             |            |   |             |             |            |   |             |            |            |   |             |             |            |    |            |             |            |   |            |             |            |
| C                                                       | -1.60831400                                                                                                                                                                                                                                                                                                                                                                                                                                                                                                                                                                                                                                                                                                                                                                                                                                                                                                                                                                                                                                                                                                                                                                                                                                                                                                                                                                                                                                                                                                                                                                                                                                                                                                                                                                                                                                                                                                                                                                                                                                                                                                                                                            | -0.53449300                                                                                                                                                                                                                                                                                                                                                                                                                                                                                                                | 1.29697800  |             |             |            |            |             |             |            |             |             |             |            |             |             |             |            |             |             |             |            |             |             |             |            |             |            |             |   |             |             |             |   |             |             |            |   |            |            |             |   |            |            |            |   |            |             |             |   |            |             |             |   |            |            |            |   |            |             |            |   |             |            |            |   |             |            |             |   |             |             |             |   |             |             |             |   |             |             |            |   |             |             |            |   |             |             |            |   |             |            |            |   |             |             |            |    |            |             |            |   |            |             |            |
| H                                                       | 0.22179200                                                                                                                                                                                                                                                                                                                                                                                                                                                                                                                                                                                                                                                                                                                                                                                                                                                                                                                                                                                                                                                                                                                                                                                                                                                                                                                                                                                                                                                                                                                                                                                                                                                                                                                                                                                                                                                                                                                                                                                                                                                                                                                                                             | 1.58850900                                                                                                                                                                                                                                                                                                                                                                                                                                                                                                                 | -1.43630500 |             |             |            |            |             |             |            |             |             |             |            |             |             |             |            |             |             |             |            |             |             |             |            |             |            |             |   |             |             |             |   |             |             |            |   |            |            |             |   |            |            |            |   |            |             |             |   |            |             |             |   |            |            |            |   |            |             |            |   |             |            |            |   |             |            |             |   |             |             |             |   |             |             |             |   |             |             |            |   |             |             |            |   |             |             |            |   |             |            |            |   |             |             |            |    |            |             |            |   |            |             |            |
| H                                                       | 0.45083600                                                                                                                                                                                                                                                                                                                                                                                                                                                                                                                                                                                                                                                                                                                                                                                                                                                                                                                                                                                                                                                                                                                                                                                                                                                                                                                                                                                                                                                                                                                                                                                                                                                                                                                                                                                                                                                                                                                                                                                                                                                                                                                                                             | 2.15442900                                                                                                                                                                                                                                                                                                                                                                                                                                                                                                                 | 0.21230300  |             |             |            |            |             |             |            |             |             |             |            |             |             |             |            |             |             |             |            |             |             |             |            |             |            |             |   |             |             |             |   |             |             |            |   |            |            |             |   |            |            |            |   |            |             |             |   |            |             |             |   |            |            |            |   |            |             |            |   |             |            |            |   |             |            |             |   |             |             |             |   |             |             |             |   |             |             |            |   |             |             |            |   |             |             |            |   |             |            |            |   |             |             |            |    |            |             |            |   |            |             |            |
| H                                                       | 0.19536900                                                                                                                                                                                                                                                                                                                                                                                                                                                                                                                                                                                                                                                                                                                                                                                                                                                                                                                                                                                                                                                                                                                                                                                                                                                                                                                                                                                                                                                                                                                                                                                                                                                                                                                                                                                                                                                                                                                                                                                                                                                                                                                                                             | -2.02063600                                                                                                                                                                                                                                                                                                                                                                                                                                                                                                                | -0.65903000 |             |             |            |            |             |             |            |             |             |             |            |             |             |             |            |             |             |             |            |             |             |             |            |             |            |             |   |             |             |             |   |             |             |            |   |            |            |             |   |            |            |            |   |            |             |             |   |            |             |             |   |            |            |            |   |            |             |            |   |             |            |            |   |             |            |             |   |             |             |             |   |             |             |             |   |             |             |            |   |             |             |            |   |             |             |            |   |             |            |            |   |             |             |            |    |            |             |            |   |            |             |            |
| H                                                       | 0.44672600                                                                                                                                                                                                                                                                                                                                                                                                                                                                                                                                                                                                                                                                                                                                                                                                                                                                                                                                                                                                                                                                                                                                                                                                                                                                                                                                                                                                                                                                                                                                                                                                                                                                                                                                                                                                                                                                                                                                                                                                                                                                                                                                                             | -0.87881600                                                                                                                                                                                                                                                                                                                                                                                                                                                                                                                | -1.97295100 |             |             |            |            |             |             |            |             |             |             |            |             |             |             |            |             |             |             |            |             |             |             |            |             |            |             |   |             |             |             |   |             |             |            |   |            |            |             |   |            |            |            |   |            |             |             |   |            |             |             |   |            |            |            |   |            |             |            |   |             |            |            |   |             |            |             |   |             |             |             |   |             |             |             |   |             |             |            |   |             |             |            |   |             |             |            |   |             |            |            |   |             |             |            |    |            |             |            |   |            |             |            |
| H                                                       | 0.19734900                                                                                                                                                                                                                                                                                                                                                                                                                                                                                                                                                                                                                                                                                                                                                                                                                                                                                                                                                                                                                                                                                                                                                                                                                                                                                                                                                                                                                                                                                                                                                                                                                                                                                                                                                                                                                                                                                                                                                                                                                                                                                                                                                             | 0.44893400                                                                                                                                                                                                                                                                                                                                                                                                                                                                                                                 | 2.07849900  |             |             |            |            |             |             |            |             |             |             |            |             |             |             |            |             |             |             |            |             |             |             |            |             |            |             |   |             |             |             |   |             |             |            |   |            |            |             |   |            |            |            |   |            |             |             |   |            |             |             |   |            |            |            |   |            |             |            |   |             |            |            |   |             |            |             |   |             |             |             |   |             |             |             |   |             |             |            |   |             |             |            |   |             |             |            |   |             |            |            |   |             |             |            |    |            |             |            |   |            |             |            |
| H                                                       | 0.41649200                                                                                                                                                                                                                                                                                                                                                                                                                                                                                                                                                                                                                                                                                                                                                                                                                                                                                                                                                                                                                                                                                                                                                                                                                                                                                                                                                                                                                                                                                                                                                                                                                                                                                                                                                                                                                                                                                                                                                                                                                                                                                                                                                             | -1.26292600                                                                                                                                                                                                                                                                                                                                                                                                                                                                                                                | 1.73657000  |             |             |            |            |             |             |            |             |             |             |            |             |             |             |            |             |             |             |            |             |             |             |            |             |            |             |   |             |             |             |   |             |             |            |   |            |            |             |   |            |            |            |   |            |             |             |   |            |             |             |   |            |            |            |   |            |             |            |   |             |            |            |   |             |            |             |   |             |             |             |   |             |             |             |   |             |             |            |   |             |             |            |   |             |             |            |   |             |            |            |   |             |             |            |    |            |             |            |   |            |             |            |
| H                                                       | -1.84893000                                                                                                                                                                                                                                                                                                                                                                                                                                                                                                                                                                                                                                                                                                                                                                                                                                                                                                                                                                                                                                                                                                                                                                                                                                                                                                                                                                                                                                                                                                                                                                                                                                                                                                                                                                                                                                                                                                                                                                                                                                                                                                                                                            | 2.03331400                                                                                                                                                                                                                                                                                                                                                                                                                                                                                                                 | 0.68507500  |             |             |            |            |             |             |            |             |             |             |            |             |             |             |            |             |             |             |            |             |             |             |            |             |            |             |   |             |             |             |   |             |             |            |   |            |            |             |   |            |            |            |   |            |             |             |   |            |             |             |   |            |            |            |   |            |             |            |   |             |            |            |   |             |            |             |   |             |             |             |   |             |             |             |   |             |             |            |   |             |             |            |   |             |             |            |   |             |            |            |   |             |             |            |    |            |             |            |   |            |             |            |
| H                                                       | -2.07797600                                                                                                                                                                                                                                                                                                                                                                                                                                                                                                                                                                                                                                                                                                                                                                                                                                                                                                                                                                                                                                                                                                                                                                                                                                                                                                                                                                                                                                                                                                                                                                                                                                                                                                                                                                                                                                                                                                                                                                                                                                                                                                                                                            | 1.92750600                                                                                                                                                                                                                                                                                                                                                                                                                                                                                                                 | -1.03983700 |             |             |            |            |             |             |            |             |             |             |            |             |             |             |            |             |             |             |            |             |             |             |            |             |            |             |   |             |             |             |   |             |             |            |   |            |            |             |   |            |            |            |   |            |             |             |   |            |             |             |   |            |            |            |   |            |             |            |   |             |            |            |   |             |            |             |   |             |             |             |   |             |             |             |   |             |             |            |   |             |             |            |   |             |             |            |   |             |            |            |   |             |             |            |    |            |             |            |   |            |             |            |
| H                                                       | -1.82640400                                                                                                                                                                                                                                                                                                                                                                                                                                                                                                                                                                                                                                                                                                                                                                                                                                                                                                                                                                                                                                                                                                                                                                                                                                                                                                                                                                                                                                                                                                                                                                                                                                                                                                                                                                                                                                                                                                                                                                                                                                                                                                                                                            | -0.36790600                                                                                                                                                                                                                                                                                                                                                                                                                                                                                                                | -2.11649600 |             |             |            |            |             |             |            |             |             |             |            |             |             |             |            |             |             |             |            |             |             |             |            |             |            |             |   |             |             |             |   |             |             |            |   |            |            |             |   |            |            |            |   |            |             |             |   |            |             |             |   |            |            |            |   |            |             |            |   |             |            |            |   |             |            |             |   |             |             |             |   |             |             |             |   |             |             |            |   |             |             |            |   |             |             |            |   |             |            |            |   |             |             |            |    |            |             |            |   |            |             |            |
| H                                                       | -2.10687600                                                                                                                                                                                                                                                                                                                                                                                                                                                                                                                                                                                                                                                                                                                                                                                                                                                                                                                                                                                                                                                                                                                                                                                                                                                                                                                                                                                                                                                                                                                                                                                                                                                                                                                                                                                                                                                                                                                                                                                                                                                                                                                                                            | -1.80098700                                                                                                                                                                                                                                                                                                                                                                                                                                                                                                                | -1.13427900 |             |             |            |            |             |             |            |             |             |             |            |             |             |             |            |             |             |             |            |             |             |             |            |             |            |             |   |             |             |             |   |             |             |            |   |            |            |             |   |            |            |            |   |            |             |             |   |            |             |             |   |            |            |            |   |            |             |            |   |             |            |            |   |             |            |             |   |             |             |             |   |             |             |             |   |             |             |            |   |             |             |            |   |             |             |            |   |             |            |            |   |             |             |            |    |            |             |            |   |            |             |            |
| H                                                       | -1.88435600                                                                                                                                                                                                                                                                                                                                                                                                                                                                                                                                                                                                                                                                                                                                                                                                                                                                                                                                                                                                                                                                                                                                                                                                                                                                                                                                                                                                                                                                                                                                                                                                                                                                                                                                                                                                                                                                                                                                                                                                                                                                                                                                                            | -1.58746800                                                                                                                                                                                                                                                                                                                                                                                                                                                                                                                | 1.35448700  |             |             |            |            |             |             |            |             |             |             |            |             |             |             |            |             |             |             |            |             |             |             |            |             |            |             |   |             |             |             |   |             |             |            |   |            |            |             |   |            |            |            |   |            |             |             |   |            |             |             |   |            |            |            |   |            |             |            |   |             |            |            |   |             |            |             |   |             |             |             |   |             |             |             |   |             |             |            |   |             |             |            |   |             |             |            |   |             |            |            |   |             |             |            |    |            |             |            |   |            |             |            |
| H                                                       | -2.09606700                                                                                                                                                                                                                                                                                                                                                                                                                                                                                                                                                                                                                                                                                                                                                                                                                                                                                                                                                                                                                                                                                                                                                                                                                                                                                                                                                                                                                                                                                                                                                                                                                                                                                                                                                                                                                                                                                                                                                                                                                                                                                                                                                            | -0.02626000                                                                                                                                                                                                                                                                                                                                                                                                                                                                                                                | 2.13038400  |             |             |            |            |             |             |            |             |             |             |            |             |             |             |            |             |             |             |            |             |             |             |            |             |            |             |   |             |             |             |   |             |             |            |   |            |            |             |   |            |            |            |   |            |             |             |   |            |             |             |   |            |            |            |   |            |             |            |   |             |            |            |   |             |            |             |   |             |             |             |   |             |             |             |   |             |             |            |   |             |             |            |   |             |             |            |   |             |            |            |   |             |             |            |    |            |             |            |   |            |             |            |
| C                                                       | -3.70534300                                                                                                                                                                                                                                                                                                                                                                                                                                                                                                                                                                                                                                                                                                                                                                                                                                                                                                                                                                                                                                                                                                                                                                                                                                                                                                                                                                                                                                                                                                                                                                                                                                                                                                                                                                                                                                                                                                                                                                                                                                                                                                                                                            | -0.01307300                                                                                                                                                                                                                                                                                                                                                                                                                                                                                                                | 0.00279900  |             |             |            |            |             |             |            |             |             |             |            |             |             |             |            |             |             |             |            |             |             |             |            |             |            |             |   |             |             |             |   |             |             |            |   |            |            |             |   |            |            |            |   |            |             |             |   |            |             |             |   |            |            |            |   |            |             |            |   |             |            |            |   |             |            |             |   |             |             |             |   |             |             |             |   |             |             |            |   |             |             |            |   |             |             |            |   |             |            |            |   |             |             |            |    |            |             |            |   |            |             |            |
| O                                                       | -4.28522100                                                                                                                                                                                                                                                                                                                                                                                                                                                                                                                                                                                                                                                                                                                                                                                                                                                                                                                                                                                                                                                                                                                                                                                                                                                                                                                                                                                                                                                                                                                                                                                                                                                                                                                                                                                                                                                                                                                                                                                                                                                                                                                                                            | 1.08940600                                                                                                                                                                                                                                                                                                                                                                                                                                                                                                                 | 0.02878300  |             |             |            |            |             |             |            |             |             |             |            |             |             |             |            |             |             |             |            |             |             |             |            |             |            |             |   |             |             |             |   |             |             |            |   |            |            |             |   |            |            |            |   |            |             |             |   |            |             |             |   |            |            |            |   |            |             |            |   |             |            |            |   |             |            |             |   |             |             |             |   |             |             |             |   |             |             |            |   |             |             |            |   |             |             |            |   |             |            |            |   |             |             |            |    |            |             |            |   |            |             |            |
| O                                                       | -4.18955200                                                                                                                                                                                                                                                                                                                                                                                                                                                                                                                                                                                                                                                                                                                                                                                                                                                                                                                                                                                                                                                                                                                                                                                                                                                                                                                                                                                                                                                                                                                                                                                                                                                                                                                                                                                                                                                                                                                                                                                                                                                                                                                                                            | -1.16315400                                                                                                                                                                                                                                                                                                                                                                                                                                                                                                                | 0.02332300  |             |             |            |            |             |             |            |             |             |             |            |             |             |             |            |             |             |             |            |             |             |             |            |             |            |             |   |             |             |             |   |             |             |            |   |            |            |             |   |            |            |            |   |            |             |             |   |            |             |             |   |            |            |            |   |            |             |            |   |             |            |            |   |             |            |             |   |             |             |             |   |             |             |             |   |             |             |            |   |             |             |            |   |             |             |            |   |             |            |            |   |             |             |            |    |            |             |            |   |            |             |            |
| I                                                       | 2.64106900                                                                                                                                                                                                                                                                                                                                                                                                                                                                                                                                                                                                                                                                                                                                                                                                                                                                                                                                                                                                                                                                                                                                                                                                                                                                                                                                                                                                                                                                                                                                                                                                                                                                                                                                                                                                                                                                                                                                                                                                                                                                                                                                                             | -0.00651500                                                                                                                                                                                                                                                                                                                                                                                                                                                                                                                | 0.00819700  |             |             |            |            |             |             |            |             |             |             |            |             |             |             |            |             |             |             |            |             |             |             |            |             |            |             |   |             |             |             |   |             |             |            |   |            |            |             |   |            |            |            |   |            |             |             |   |            |             |             |   |            |            |            |   |            |             |            |   |             |            |            |   |             |            |             |   |             |             |             |   |             |             |             |   |             |             |            |   |             |             |            |   |             |             |            |   |             |            |            |   |             |             |            |    |            |             |            |   |            |             |            |

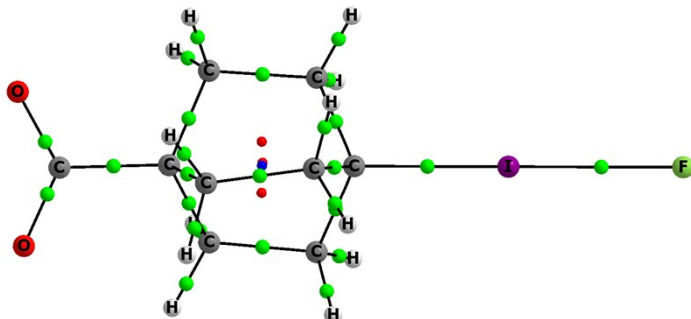

**3[CO<sub>2</sub><sup>-</sup>,C-I]:F<sup>-</sup>**

|   |             |             |             |
|---|-------------|-------------|-------------|
| C | 0.14849700  | 0.00816700  | -0.00735500 |
| C | -2.48769900 | 0.02881400  | -0.02583300 |
| C | -0.38930900 | 1.38600300  | -0.40593200 |
| C | -0.39632400 | -1.02107900 | -1.00104700 |
| C | -0.40584200 | -0.33515100 | 1.37794400  |
| C | -1.92590600 | 1.44127800  | -0.19851600 |
| C | -1.92903300 | -0.84484400 | -1.15712800 |
| C | -1.94253700 | -0.53179800 | 1.29802800  |
| H | -0.12966000 | 1.56884700  | -1.45279000 |
| H | 0.11296300  | 2.15957800  | 0.17896400  |
| H | -0.15336300 | -2.02238000 | -0.63420300 |
| H | 0.11048300  | -0.90756800 | -1.96154900 |
| H | -0.15041400 | 0.47526600  | 2.06638500  |
| H | 0.08310600  | -1.23528000 | 1.75640200  |
| H | -2.18272800 | 2.02835700  | 0.68565100  |
| H | -2.42633600 | 1.92635100  | -1.03740400 |
| H | -2.16043600 | -0.36423000 | -2.11332500 |
| H | -2.45067400 | -1.80152300 | -1.14139500 |
| H | -2.21306800 | -1.58782100 | 1.35438700  |
| H | -2.44140700 | -0.03010700 | 2.13157900  |
| C | -4.04863400 | -0.01467500 | 0.00538900  |
| O | -4.64437600 | 1.08478900  | 0.03169600  |
| O | -4.55144700 | -1.16148400 | 0.02653200  |
| I | 2.34563000  | -0.00317800 | 0.00468900  |
| F | 4.83449400  | -0.01419500 | 0.01551900  |

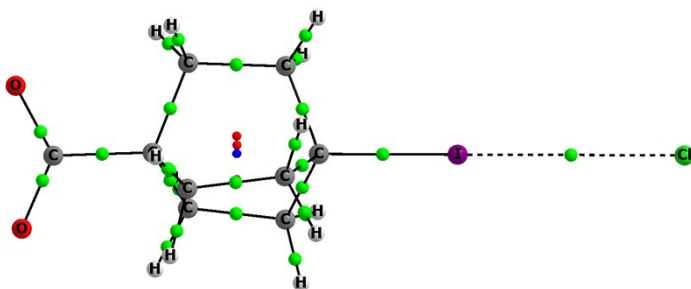

**3[CO<sub>2</sub><sup>-</sup>,C-I]:Cl<sup>-</sup>**

|    |             |             |             |
|----|-------------|-------------|-------------|
| C  | -0.23083100 | 0.00913000  | -0.00830900 |
| C  | -2.84489900 | 0.02783500  | -0.02416200 |
| C  | -0.75099400 | 1.39242400  | -0.40326900 |
| C  | -0.75655700 | -1.02117400 | -1.00797900 |
| C  | -0.76447200 | -0.34072900 | 1.38111300  |
| C  | -2.28733500 | 1.44158700  | -0.19394200 |
| C  | -2.28943200 | -0.84331700 | -1.15782700 |
| C  | -2.30102700 | -0.53574200 | 1.29801500  |
| H  | -0.48946300 | 1.57607500  | -1.44835400 |
| H  | -0.24805700 | 2.15903800  | 0.18779700  |
| H  | -0.50883100 | -2.02093000 | -0.64327300 |
| H  | -0.25058100 | -0.89760300 | -1.96621100 |
| H  | -0.50562900 | 0.46722500  | 2.06948200  |
| H  | -0.27375000 | -1.24284200 | 1.74878100  |
| H  | -2.54337800 | 2.02711700  | 0.69061900  |
| H  | -2.78612700 | 1.92701200  | -1.03261000 |
| H  | -2.52208000 | -0.36346200 | -2.11316700 |
| H  | -2.80776900 | -1.80113800 | -1.14013200 |
| H  | -2.57076300 | -1.59139500 | 1.35319700  |
| H  | -2.79598200 | -0.03448000 | 2.13302500  |
| C  | -4.40650300 | -0.01714400 | 0.00780300  |
| O  | -4.99840200 | 1.08269400  | 0.03446200  |
| O  | -4.90276800 | -1.16531800 | 0.02874500  |
| I  | 1.95183100  | -0.00017900 | 0.00144700  |
| Cl | 5.52100300  | -0.01243200 | 0.01351900  |

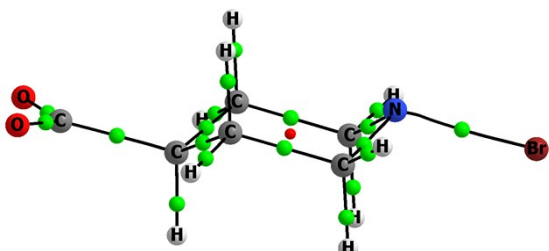

**4[CO<sub>2</sub><sup>-</sup>,N-Br]**

|    |             |             |             |
|----|-------------|-------------|-------------|
| N  | -0.45239700 | 0.95418600  | 0.00000000  |
| C  | 0.15447200  | 0.38667000  | 1.21272200  |
| C  | -0.10315700 | -1.11580000 | 1.24024500  |
| C  | 0.45307400  | -1.79754900 | 0.00000000  |
| C  | -0.10315700 | -1.11580000 | -1.24024500 |
| C  | 0.15447200  | 0.38667000  | -1.21272200 |
| H  | 0.34151000  | -1.55023200 | 2.13437000  |
| H  | 1.23689300  | 0.58193400  | 1.22835700  |
| H  | -0.29509700 | 0.88266800  | 2.07258700  |
| H  | 1.54412300  | -1.66474100 | 0.00000000  |
| H  | 0.34151000  | -1.55023200 | -2.13437000 |
| H  | -1.17900600 | -1.29755800 | -1.30044000 |
| H  | 1.23689300  | 0.58193400  | -1.22835700 |
| H  | -0.29509700 | 0.88266800  | -2.07258700 |
| H  | -1.17900600 | -1.29755800 | 1.30044000  |
| C  | 0.21974100  | -3.34381500 | 0.00000000  |
| O  | 0.15447200  | -3.87256500 | -1.12721200 |
| O  | 0.15447200  | -3.87256500 | 1.12721200  |
| Br | -0.16314800 | 2.83744600  | 0.00000000  |

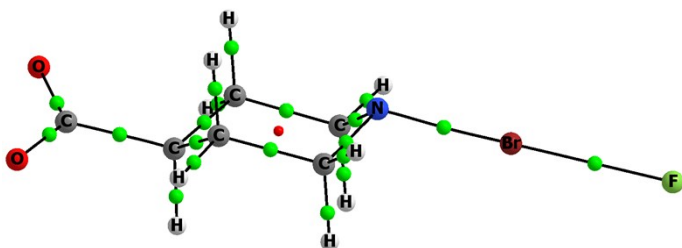

**4[CO<sub>2</sub><sup>-</sup>,N-Br]:F<sup>-</sup>**

|    |             |             |             |
|----|-------------|-------------|-------------|
| N  | -0.56359100 | 0.05691500  | -0.43117300 |
| C  | 0.05468900  | -1.19057300 | -0.00376200 |
| C  | 1.55101800  | -1.19220100 | -0.30953700 |
| C  | 2.25688500  | -0.01444600 | 0.35825300  |
| C  | 1.53903300  | 1.27113600  | -0.02776500 |
| C  | 0.04227400  | 1.18201700  | 0.26858700  |
| H  | 2.01013000  | -2.12386700 | 0.02312500  |
| H  | -0.09218000 | -1.34834100 | 1.08127200  |
| H  | -0.44959600 | -2.01078100 | -0.51822000 |
| H  | 2.15531000  | -0.15343100 | 1.44357400  |
| H  | 1.97905500  | 2.11886100  | 0.50037600  |
| H  | 1.69010500  | 1.45363800  | -1.09432400 |
| H  | -0.10830800 | 1.08731900  | 1.36064600  |
| H  | -0.47176800 | 2.09166600  | -0.04775800 |
| H  | 1.69167500  | -1.12220700 | -1.39309600 |
| C  | 3.79077900  | -0.01275100 | 0.07837300  |
| O  | 4.29480300  | 1.06244800  | -0.31322400 |
| O  | 4.37198000  | -1.10054300 | 0.29801500  |
| Br | -2.46522300 | 0.00524100  | -0.08418100 |
| F  | -4.76875900 | -0.05878200 | 0.28285900  |

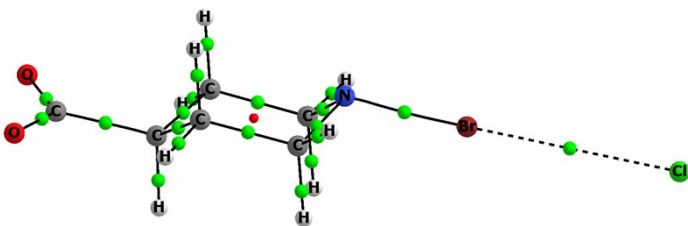

**4[CO<sub>2</sub><sup>-</sup>,N-Br]:Cl<sup>-</sup>**

|   |             |             |             |
|---|-------------|-------------|-------------|
| N | -0.10874300 | 0.03622200  | -0.46802700 |
| C | 0.48695600  | -1.20125800 | 0.03635300  |
| C | 1.98594300  | -1.21575000 | -0.24775400 |
| C | 2.68365100  | -0.01190100 | 0.37496100  |
| C | 1.98183300  | 1.25819400  | -0.08320700 |
| C | 0.48223300  | 1.19878300  | 0.19574600  |
| H | 2.43310500  | -2.13409900 | 0.13191600  |
| H | 0.31603700  | -1.29934200 | 1.12152400  |
| H | -0.01456400 | -2.03689100 | -0.45254900 |
| H | 2.56440800  | -0.09301800 | 1.46480500  |
| H | 2.41997600  | 2.12585200  | 0.41012400  |
| H | 2.14698600  | 1.38954600  | -1.15547200 |
| H | 0.30830400  | 1.15126900  | 1.28389600  |
| H | -0.02253500 | 2.08966500  | -0.17910700 |
| H | 2.14452600  | -1.19996100 | -1.33018300 |
| C | 4.22478700  | -0.01336800 | 0.12695900  |
| O | 4.75017800  | 1.09510700  | -0.11049100 |



|                                                                                     |                                                                                                                                                                                                                                                                                                                                                                                                                                                                                                                                                                                                                                                                                                                                                                                                                                                                                                                                                                 |
|-------------------------------------------------------------------------------------|-----------------------------------------------------------------------------------------------------------------------------------------------------------------------------------------------------------------------------------------------------------------------------------------------------------------------------------------------------------------------------------------------------------------------------------------------------------------------------------------------------------------------------------------------------------------------------------------------------------------------------------------------------------------------------------------------------------------------------------------------------------------------------------------------------------------------------------------------------------------------------------------------------------------------------------------------------------------|
|                                                                                     | <p>O 4.77996800 -1.12978300 0.22441700</p> <p>Br -1.98937600 0.01192400 -0.16044600</p> <p>Cl -5.24826400 -0.02792400 0.25100500</p>                                                                                                                                                                                                                                                                                                                                                                                                                                                                                                                                                                                                                                                                                                                                                                                                                            |
| 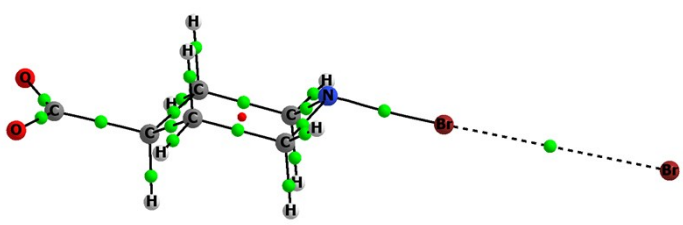   | <p><b>4[CO<sub>2</sub><sup>-</sup>,N-Br]:Br<sup>-</sup></b></p> <p>N 0.68148700 0.03666500 -0.50082800</p> <p>C 1.26387600 -1.20186800 0.02052600</p> <p>C 2.76710500 -1.21810500 -0.23841400</p> <p>C 3.45499900 -0.01344400 0.39262800</p> <p>C 2.76467600 1.25628400 -0.08293300</p> <p>C 1.26067500 1.20264100 0.17040700</p> <p>H 3.20582200 -2.13608600 0.15144000</p> <p>H 1.07334700 -1.29332000 1.10231200</p> <p>H 0.76888200 -2.03743900 -0.47458200</p> <p>H 3.31665900 -0.08980400 1.48052400</p> <p>H 3.19545400 2.12491700 0.41472800</p> <p>H 2.94866700 1.38343400 -1.15257100</p> <p>H 1.06649900 1.15863700 1.25455400</p> <p>H 0.76426100 2.09186000 -0.21859800</p> <p>H 2.94438000 -1.20650400 -1.31784500</p> <p>C 5.00044900 -0.01678100 0.17109200</p> <p>O 5.53116600 1.09369800 -0.04186800</p> <p>O 5.54984500 -1.13604800 0.26294500</p> <p>Br -1.20093600 0.01696900 -0.22273000</p> <p>Br -4.84972500 -0.01599500 0.16265500</p> |
|  | <p><b>4[CO<sub>2</sub><sup>-</sup>,N-I]</b></p> <p>N -0.40848200 0.45195600 0.00000000</p> <p>C 0.20125100 -0.11738200 1.21242700</p> <p>C -0.05474900 -1.62093400 1.23996900</p> <p>C 0.50126900 -2.30264000 0.00000000</p> <p>C -0.05474900 -1.62093400 -1.23996900</p> <p>C 0.20125100 -0.11738200 -1.21242700</p> <p>H 0.39042600 -2.05476500 2.13452700</p> <p>H 1.28483400 0.07424000 1.23199500</p> <p>H -0.24554700 0.37274200 2.07767500</p> <p>H 1.59251900 -2.17062200 0.00000000</p> <p>H 0.39042600 -2.05476500 -2.13452700</p> <p>H -1.13068500 -1.80241900 -1.30007100</p> <p>H 1.28483400 0.07424000 -1.23199500</p> <p>H -0.24554700 0.37274200 -2.07767500</p> <p>H -1.13068500 -1.80241900 1.30007100</p> <p>C 0.26663000 -3.84875200 0.00000000</p> <p>O 0.20125100 -4.37758700 -1.12720500</p> <p>O 0.20125100 -4.37758700 1.12720500</p> <p>I -0.16823800 2.52145000 0.00000000</p>                                                       |
|  | <p><b>4[CO<sub>2</sub><sup>-</sup>,N-F]</b></p> <p>N -0.13278900 0.05209100 -0.37865000</p> <p>C 0.50488200 -1.19236100 0.01815100</p> <p>C 1.99895300 -1.18860000 -0.30800600</p> <p>C 2.71092300 -0.01392400 0.36031700</p> <p>C 1.98063500 1.27221200 -0.00021400</p> <p>C 0.48727200 1.16884300 0.31632600</p> <p>H 2.46797500 -2.12132800 0.00951400</p> <p>H 0.38427700 -1.37445400 1.10583800</p> <p>H 0.00395300 -2.01644600 -0.49637200</p> <p>H 2.62755300 -0.16593200 1.44545800</p> <p>H 2.42552300 2.11658900 0.53082700</p> <p>H 2.11329500 1.46617800 -1.06719800</p> <p>H 0.36381000 1.07119500 1.41483300</p> <p>H -0.02937500 2.08627100 0.02305700</p>                                                                                                                                                                                                                                                                                       |



|                                                         |                                                                                     |                                                                                                                                                                                                                                                                                                                                                                                                                                                                                                                                                                                                                                                                                                                                                                                                                                                                                                                                                                                                                                                                                                                                                                                                                                                                                                                                                                                                                                                                                                                                                                                                                                                                                                                                                                    |                                                         |            |             |             |   |             |             |             |   |             |             |             |   |             |             |             |   |             |             |             |   |             |             |             |   |             |             |            |   |             |             |            |   |             |             |            |   |             |             |             |   |             |             |            |   |             |             |            |   |             |             |             |   |             |             |            |   |             |             |             |   |             |             |             |   |             |             |            |   |             |             |             |   |             |             |             |   |             |            |             |    |             |             |            |
|---------------------------------------------------------|-------------------------------------------------------------------------------------|--------------------------------------------------------------------------------------------------------------------------------------------------------------------------------------------------------------------------------------------------------------------------------------------------------------------------------------------------------------------------------------------------------------------------------------------------------------------------------------------------------------------------------------------------------------------------------------------------------------------------------------------------------------------------------------------------------------------------------------------------------------------------------------------------------------------------------------------------------------------------------------------------------------------------------------------------------------------------------------------------------------------------------------------------------------------------------------------------------------------------------------------------------------------------------------------------------------------------------------------------------------------------------------------------------------------------------------------------------------------------------------------------------------------------------------------------------------------------------------------------------------------------------------------------------------------------------------------------------------------------------------------------------------------------------------------------------------------------------------------------------------------|---------------------------------------------------------|------------|-------------|-------------|---|-------------|-------------|-------------|---|-------------|-------------|-------------|---|-------------|-------------|-------------|---|-------------|-------------|-------------|---|-------------|-------------|-------------|---|-------------|-------------|------------|---|-------------|-------------|------------|---|-------------|-------------|------------|---|-------------|-------------|-------------|---|-------------|-------------|------------|---|-------------|-------------|------------|---|-------------|-------------|-------------|---|-------------|-------------|------------|---|-------------|-------------|-------------|---|-------------|-------------|-------------|---|-------------|-------------|------------|---|-------------|-------------|-------------|---|-------------|-------------|-------------|---|-------------|------------|-------------|----|-------------|-------------|------------|
|                                                         | 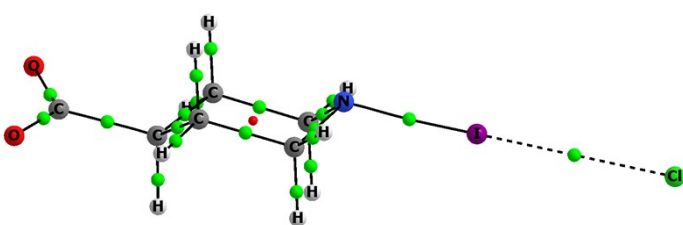   | <table> <tbody> <tr><td>H</td><td>2.12158100</td><td>-1.10602400</td><td>-1.39315900</td></tr> <tr><td>C</td><td>4.23938800</td><td>-0.00641400</td><td>0.05417300</td></tr> <tr><td>O</td><td>4.72694000</td><td>1.05633600</td><td>-0.38968000</td></tr> <tr><td>O</td><td>4.83674900</td><td>-1.07954400</td><td>0.30445800</td></tr> <tr><td>I</td><td>-2.24614200</td><td>-0.00078300</td><td>-0.05630000</td></tr> <tr><td>F</td><td>-4.50504100</td><td>-0.03689300</td><td>0.23321600</td></tr> </tbody> </table>                                                                                                                                                                                                                                                                                                                                                                                                                                                                                                                                                                                                                                                                                                                                                                                                                                                                                                                                                                                                                                                                                                                                                                                                                                          | H                                                       | 2.12158100 | -1.10602400 | -1.39315900 | C | 4.23938800  | -0.00641400 | 0.05417300  | O | 4.72694000  | 1.05633600  | -0.38968000 | O | 4.83674900  | -1.07954400 | 0.30445800  | I | -2.24614200 | -0.00078300 | -0.05630000 | F | -4.50504100 | -0.03689300 | 0.23321600  |   |             |             |            |   |             |             |            |   |             |             |            |   |             |             |             |   |             |             |            |   |             |             |            |   |             |             |             |   |             |             |            |   |             |             |             |   |             |             |             |   |             |             |            |   |             |             |             |   |             |             |             |   |             |            |             |    |             |             |            |
| H                                                       | 2.12158100                                                                          | -1.10602400                                                                                                                                                                                                                                                                                                                                                                                                                                                                                                                                                                                                                                                                                                                                                                                                                                                                                                                                                                                                                                                                                                                                                                                                                                                                                                                                                                                                                                                                                                                                                                                                                                                                                                                                                        | -1.39315900                                             |            |             |             |   |             |             |             |   |             |             |             |   |             |             |             |   |             |             |             |   |             |             |             |   |             |             |            |   |             |             |            |   |             |             |            |   |             |             |             |   |             |             |            |   |             |             |            |   |             |             |             |   |             |             |            |   |             |             |             |   |             |             |             |   |             |             |            |   |             |             |             |   |             |             |             |   |             |            |             |    |             |             |            |
| C                                                       | 4.23938800                                                                          | -0.00641400                                                                                                                                                                                                                                                                                                                                                                                                                                                                                                                                                                                                                                                                                                                                                                                                                                                                                                                                                                                                                                                                                                                                                                                                                                                                                                                                                                                                                                                                                                                                                                                                                                                                                                                                                        | 0.05417300                                              |            |             |             |   |             |             |             |   |             |             |             |   |             |             |             |   |             |             |             |   |             |             |             |   |             |             |            |   |             |             |            |   |             |             |            |   |             |             |             |   |             |             |            |   |             |             |            |   |             |             |             |   |             |             |            |   |             |             |             |   |             |             |             |   |             |             |            |   |             |             |             |   |             |             |             |   |             |            |             |    |             |             |            |
| O                                                       | 4.72694000                                                                          | 1.05633600                                                                                                                                                                                                                                                                                                                                                                                                                                                                                                                                                                                                                                                                                                                                                                                                                                                                                                                                                                                                                                                                                                                                                                                                                                                                                                                                                                                                                                                                                                                                                                                                                                                                                                                                                         | -0.38968000                                             |            |             |             |   |             |             |             |   |             |             |             |   |             |             |             |   |             |             |             |   |             |             |             |   |             |             |            |   |             |             |            |   |             |             |            |   |             |             |             |   |             |             |            |   |             |             |            |   |             |             |             |   |             |             |            |   |             |             |             |   |             |             |             |   |             |             |            |   |             |             |             |   |             |             |             |   |             |            |             |    |             |             |            |
| O                                                       | 4.83674900                                                                          | -1.07954400                                                                                                                                                                                                                                                                                                                                                                                                                                                                                                                                                                                                                                                                                                                                                                                                                                                                                                                                                                                                                                                                                                                                                                                                                                                                                                                                                                                                                                                                                                                                                                                                                                                                                                                                                        | 0.30445800                                              |            |             |             |   |             |             |             |   |             |             |             |   |             |             |             |   |             |             |             |   |             |             |             |   |             |             |            |   |             |             |            |   |             |             |            |   |             |             |             |   |             |             |            |   |             |             |            |   |             |             |             |   |             |             |            |   |             |             |             |   |             |             |             |   |             |             |            |   |             |             |             |   |             |             |             |   |             |            |             |    |             |             |            |
| I                                                       | -2.24614200                                                                         | -0.00078300                                                                                                                                                                                                                                                                                                                                                                                                                                                                                                                                                                                                                                                                                                                                                                                                                                                                                                                                                                                                                                                                                                                                                                                                                                                                                                                                                                                                                                                                                                                                                                                                                                                                                                                                                        | -0.05630000                                             |            |             |             |   |             |             |             |   |             |             |             |   |             |             |             |   |             |             |             |   |             |             |             |   |             |             |            |   |             |             |            |   |             |             |            |   |             |             |             |   |             |             |            |   |             |             |            |   |             |             |             |   |             |             |            |   |             |             |             |   |             |             |             |   |             |             |            |   |             |             |             |   |             |             |             |   |             |            |             |    |             |             |            |
| F                                                       | -4.50504100                                                                         | -0.03689300                                                                                                                                                                                                                                                                                                                                                                                                                                                                                                                                                                                                                                                                                                                                                                                                                                                                                                                                                                                                                                                                                                                                                                                                                                                                                                                                                                                                                                                                                                                                                                                                                                                                                                                                                        | 0.23321600                                              |            |             |             |   |             |             |             |   |             |             |             |   |             |             |             |   |             |             |             |   |             |             |             |   |             |             |            |   |             |             |            |   |             |             |            |   |             |             |             |   |             |             |            |   |             |             |            |   |             |             |             |   |             |             |            |   |             |             |             |   |             |             |             |   |             |             |            |   |             |             |             |   |             |             |             |   |             |            |             |    |             |             |            |
|                                                         |  | <table> <tbody> <tr><td colspan="4"><b>4[CO<sub>2</sub><sup>-</sup>,N-I]:Cl<sup>-</sup></b></td></tr> <tr><td>N</td><td>0.22103100</td><td>0.05226200</td><td>-0.41636000</td></tr> <tr><td>C</td><td>0.83592500</td><td>-1.19689500</td><td>0.02741100</td></tr> <tr><td>C</td><td>2.33247300</td><td>-1.20098500</td><td>-0.27593700</td></tr> <tr><td>C</td><td>3.03757500</td><td>-0.01790900</td><td>0.37982000</td></tr> <tr><td>C</td><td>2.32689900</td><td>1.26480900</td><td>-0.02539300</td></tr> <tr><td>C</td><td>0.82990300</td><td>1.18893600</td><td>0.27182700</td></tr> <tr><td>H</td><td>2.78837900</td><td>-2.13017600</td><td>0.06717700</td></tr> <tr><td>H</td><td>0.68943800</td><td>-1.34621000</td><td>1.11278000</td></tr> <tr><td>H</td><td>0.33628700</td><td>-2.02313300</td><td>-0.48176300</td></tr> <tr><td>H</td><td>2.93306600</td><td>-0.14106400</td><td>1.46699700</td></tr> <tr><td>H</td><td>2.76990400</td><td>2.11785300</td><td>0.49063800</td></tr> <tr><td>H</td><td>2.47761800</td><td>1.43152100</td><td>-1.09459600</td></tr> <tr><td>H</td><td>0.68119200</td><td>1.11289700</td><td>1.36467000</td></tr> <tr><td>H</td><td>0.32422000</td><td>2.09791800</td><td>-0.05912600</td></tr> <tr><td>H</td><td>2.47446700</td><td>-1.14417400</td><td>-1.35976200</td></tr> <tr><td>C</td><td>4.57332600</td><td>-0.01946000</td><td>0.10559500</td></tr> <tr><td>O</td><td>5.08414200</td><td>1.06795300</td><td>-0.23875800</td></tr> <tr><td>O</td><td>5.14286000</td><td>-1.11947300</td><td>0.28461300</td></tr> <tr><td>I</td><td>-1.85717200</td><td>0.01453300</td><td>-0.11574200</td></tr> <tr><td>Cl</td><td>-4.94260600</td><td>-0.04766700</td><td>0.25147300</td></tr> </tbody> </table>                 | <b>4[CO<sub>2</sub><sup>-</sup>,N-I]:Cl<sup>-</sup></b> |            |             |             | N | 0.22103100  | 0.05226200  | -0.41636000 | C | 0.83592500  | -1.19689500 | 0.02741100  | C | 2.33247300  | -1.20098500 | -0.27593700 | C | 3.03757500  | -0.01790900 | 0.37982000  | C | 2.32689900  | 1.26480900  | -0.02539300 | C | 0.82990300  | 1.18893600  | 0.27182700 | H | 2.78837900  | -2.13017600 | 0.06717700 | H | 0.68943800  | -1.34621000 | 1.11278000 | H | 0.33628700  | -2.02313300 | -0.48176300 | H | 2.93306600  | -0.14106400 | 1.46699700 | H | 2.76990400  | 2.11785300  | 0.49063800 | H | 2.47761800  | 1.43152100  | -1.09459600 | H | 0.68119200  | 1.11289700  | 1.36467000 | H | 0.32422000  | 2.09791800  | -0.05912600 | H | 2.47446700  | -1.14417400 | -1.35976200 | C | 4.57332600  | -0.01946000 | 0.10559500 | O | 5.08414200  | 1.06795300  | -0.23875800 | O | 5.14286000  | -1.11947300 | 0.28461300  | I | -1.85717200 | 0.01453300 | -0.11574200 | Cl | -4.94260600 | -0.04766700 | 0.25147300 |
| <b>4[CO<sub>2</sub><sup>-</sup>,N-I]:Cl<sup>-</sup></b> |                                                                                     |                                                                                                                                                                                                                                                                                                                                                                                                                                                                                                                                                                                                                                                                                                                                                                                                                                                                                                                                                                                                                                                                                                                                                                                                                                                                                                                                                                                                                                                                                                                                                                                                                                                                                                                                                                    |                                                         |            |             |             |   |             |             |             |   |             |             |             |   |             |             |             |   |             |             |             |   |             |             |             |   |             |             |            |   |             |             |            |   |             |             |            |   |             |             |             |   |             |             |            |   |             |             |            |   |             |             |             |   |             |             |            |   |             |             |             |   |             |             |             |   |             |             |            |   |             |             |             |   |             |             |             |   |             |            |             |    |             |             |            |
| N                                                       | 0.22103100                                                                          | 0.05226200                                                                                                                                                                                                                                                                                                                                                                                                                                                                                                                                                                                                                                                                                                                                                                                                                                                                                                                                                                                                                                                                                                                                                                                                                                                                                                                                                                                                                                                                                                                                                                                                                                                                                                                                                         | -0.41636000                                             |            |             |             |   |             |             |             |   |             |             |             |   |             |             |             |   |             |             |             |   |             |             |             |   |             |             |            |   |             |             |            |   |             |             |            |   |             |             |             |   |             |             |            |   |             |             |            |   |             |             |             |   |             |             |            |   |             |             |             |   |             |             |             |   |             |             |            |   |             |             |             |   |             |             |             |   |             |            |             |    |             |             |            |
| C                                                       | 0.83592500                                                                          | -1.19689500                                                                                                                                                                                                                                                                                                                                                                                                                                                                                                                                                                                                                                                                                                                                                                                                                                                                                                                                                                                                                                                                                                                                                                                                                                                                                                                                                                                                                                                                                                                                                                                                                                                                                                                                                        | 0.02741100                                              |            |             |             |   |             |             |             |   |             |             |             |   |             |             |             |   |             |             |             |   |             |             |             |   |             |             |            |   |             |             |            |   |             |             |            |   |             |             |             |   |             |             |            |   |             |             |            |   |             |             |             |   |             |             |            |   |             |             |             |   |             |             |             |   |             |             |            |   |             |             |             |   |             |             |             |   |             |            |             |    |             |             |            |
| C                                                       | 2.33247300                                                                          | -1.20098500                                                                                                                                                                                                                                                                                                                                                                                                                                                                                                                                                                                                                                                                                                                                                                                                                                                                                                                                                                                                                                                                                                                                                                                                                                                                                                                                                                                                                                                                                                                                                                                                                                                                                                                                                        | -0.27593700                                             |            |             |             |   |             |             |             |   |             |             |             |   |             |             |             |   |             |             |             |   |             |             |             |   |             |             |            |   |             |             |            |   |             |             |            |   |             |             |             |   |             |             |            |   |             |             |            |   |             |             |             |   |             |             |            |   |             |             |             |   |             |             |             |   |             |             |            |   |             |             |             |   |             |             |             |   |             |            |             |    |             |             |            |
| C                                                       | 3.03757500                                                                          | -0.01790900                                                                                                                                                                                                                                                                                                                                                                                                                                                                                                                                                                                                                                                                                                                                                                                                                                                                                                                                                                                                                                                                                                                                                                                                                                                                                                                                                                                                                                                                                                                                                                                                                                                                                                                                                        | 0.37982000                                              |            |             |             |   |             |             |             |   |             |             |             |   |             |             |             |   |             |             |             |   |             |             |             |   |             |             |            |   |             |             |            |   |             |             |            |   |             |             |             |   |             |             |            |   |             |             |            |   |             |             |             |   |             |             |            |   |             |             |             |   |             |             |             |   |             |             |            |   |             |             |             |   |             |             |             |   |             |            |             |    |             |             |            |
| C                                                       | 2.32689900                                                                          | 1.26480900                                                                                                                                                                                                                                                                                                                                                                                                                                                                                                                                                                                                                                                                                                                                                                                                                                                                                                                                                                                                                                                                                                                                                                                                                                                                                                                                                                                                                                                                                                                                                                                                                                                                                                                                                         | -0.02539300                                             |            |             |             |   |             |             |             |   |             |             |             |   |             |             |             |   |             |             |             |   |             |             |             |   |             |             |            |   |             |             |            |   |             |             |            |   |             |             |             |   |             |             |            |   |             |             |            |   |             |             |             |   |             |             |            |   |             |             |             |   |             |             |             |   |             |             |            |   |             |             |             |   |             |             |             |   |             |            |             |    |             |             |            |
| C                                                       | 0.82990300                                                                          | 1.18893600                                                                                                                                                                                                                                                                                                                                                                                                                                                                                                                                                                                                                                                                                                                                                                                                                                                                                                                                                                                                                                                                                                                                                                                                                                                                                                                                                                                                                                                                                                                                                                                                                                                                                                                                                         | 0.27182700                                              |            |             |             |   |             |             |             |   |             |             |             |   |             |             |             |   |             |             |             |   |             |             |             |   |             |             |            |   |             |             |            |   |             |             |            |   |             |             |             |   |             |             |            |   |             |             |            |   |             |             |             |   |             |             |            |   |             |             |             |   |             |             |             |   |             |             |            |   |             |             |             |   |             |             |             |   |             |            |             |    |             |             |            |
| H                                                       | 2.78837900                                                                          | -2.13017600                                                                                                                                                                                                                                                                                                                                                                                                                                                                                                                                                                                                                                                                                                                                                                                                                                                                                                                                                                                                                                                                                                                                                                                                                                                                                                                                                                                                                                                                                                                                                                                                                                                                                                                                                        | 0.06717700                                              |            |             |             |   |             |             |             |   |             |             |             |   |             |             |             |   |             |             |             |   |             |             |             |   |             |             |            |   |             |             |            |   |             |             |            |   |             |             |             |   |             |             |            |   |             |             |            |   |             |             |             |   |             |             |            |   |             |             |             |   |             |             |             |   |             |             |            |   |             |             |             |   |             |             |             |   |             |            |             |    |             |             |            |
| H                                                       | 0.68943800                                                                          | -1.34621000                                                                                                                                                                                                                                                                                                                                                                                                                                                                                                                                                                                                                                                                                                                                                                                                                                                                                                                                                                                                                                                                                                                                                                                                                                                                                                                                                                                                                                                                                                                                                                                                                                                                                                                                                        | 1.11278000                                              |            |             |             |   |             |             |             |   |             |             |             |   |             |             |             |   |             |             |             |   |             |             |             |   |             |             |            |   |             |             |            |   |             |             |            |   |             |             |             |   |             |             |            |   |             |             |            |   |             |             |             |   |             |             |            |   |             |             |             |   |             |             |             |   |             |             |            |   |             |             |             |   |             |             |             |   |             |            |             |    |             |             |            |
| H                                                       | 0.33628700                                                                          | -2.02313300                                                                                                                                                                                                                                                                                                                                                                                                                                                                                                                                                                                                                                                                                                                                                                                                                                                                                                                                                                                                                                                                                                                                                                                                                                                                                                                                                                                                                                                                                                                                                                                                                                                                                                                                                        | -0.48176300                                             |            |             |             |   |             |             |             |   |             |             |             |   |             |             |             |   |             |             |             |   |             |             |             |   |             |             |            |   |             |             |            |   |             |             |            |   |             |             |             |   |             |             |            |   |             |             |            |   |             |             |             |   |             |             |            |   |             |             |             |   |             |             |             |   |             |             |            |   |             |             |             |   |             |             |             |   |             |            |             |    |             |             |            |
| H                                                       | 2.93306600                                                                          | -0.14106400                                                                                                                                                                                                                                                                                                                                                                                                                                                                                                                                                                                                                                                                                                                                                                                                                                                                                                                                                                                                                                                                                                                                                                                                                                                                                                                                                                                                                                                                                                                                                                                                                                                                                                                                                        | 1.46699700                                              |            |             |             |   |             |             |             |   |             |             |             |   |             |             |             |   |             |             |             |   |             |             |             |   |             |             |            |   |             |             |            |   |             |             |            |   |             |             |             |   |             |             |            |   |             |             |            |   |             |             |             |   |             |             |            |   |             |             |             |   |             |             |             |   |             |             |            |   |             |             |             |   |             |             |             |   |             |            |             |    |             |             |            |
| H                                                       | 2.76990400                                                                          | 2.11785300                                                                                                                                                                                                                                                                                                                                                                                                                                                                                                                                                                                                                                                                                                                                                                                                                                                                                                                                                                                                                                                                                                                                                                                                                                                                                                                                                                                                                                                                                                                                                                                                                                                                                                                                                         | 0.49063800                                              |            |             |             |   |             |             |             |   |             |             |             |   |             |             |             |   |             |             |             |   |             |             |             |   |             |             |            |   |             |             |            |   |             |             |            |   |             |             |             |   |             |             |            |   |             |             |            |   |             |             |             |   |             |             |            |   |             |             |             |   |             |             |             |   |             |             |            |   |             |             |             |   |             |             |             |   |             |            |             |    |             |             |            |
| H                                                       | 2.47761800                                                                          | 1.43152100                                                                                                                                                                                                                                                                                                                                                                                                                                                                                                                                                                                                                                                                                                                                                                                                                                                                                                                                                                                                                                                                                                                                                                                                                                                                                                                                                                                                                                                                                                                                                                                                                                                                                                                                                         | -1.09459600                                             |            |             |             |   |             |             |             |   |             |             |             |   |             |             |             |   |             |             |             |   |             |             |             |   |             |             |            |   |             |             |            |   |             |             |            |   |             |             |             |   |             |             |            |   |             |             |            |   |             |             |             |   |             |             |            |   |             |             |             |   |             |             |             |   |             |             |            |   |             |             |             |   |             |             |             |   |             |            |             |    |             |             |            |
| H                                                       | 0.68119200                                                                          | 1.11289700                                                                                                                                                                                                                                                                                                                                                                                                                                                                                                                                                                                                                                                                                                                                                                                                                                                                                                                                                                                                                                                                                                                                                                                                                                                                                                                                                                                                                                                                                                                                                                                                                                                                                                                                                         | 1.36467000                                              |            |             |             |   |             |             |             |   |             |             |             |   |             |             |             |   |             |             |             |   |             |             |             |   |             |             |            |   |             |             |            |   |             |             |            |   |             |             |             |   |             |             |            |   |             |             |            |   |             |             |             |   |             |             |            |   |             |             |             |   |             |             |             |   |             |             |            |   |             |             |             |   |             |             |             |   |             |            |             |    |             |             |            |
| H                                                       | 0.32422000                                                                          | 2.09791800                                                                                                                                                                                                                                                                                                                                                                                                                                                                                                                                                                                                                                                                                                                                                                                                                                                                                                                                                                                                                                                                                                                                                                                                                                                                                                                                                                                                                                                                                                                                                                                                                                                                                                                                                         | -0.05912600                                             |            |             |             |   |             |             |             |   |             |             |             |   |             |             |             |   |             |             |             |   |             |             |             |   |             |             |            |   |             |             |            |   |             |             |            |   |             |             |             |   |             |             |            |   |             |             |            |   |             |             |             |   |             |             |            |   |             |             |             |   |             |             |             |   |             |             |            |   |             |             |             |   |             |             |             |   |             |            |             |    |             |             |            |
| H                                                       | 2.47446700                                                                          | -1.14417400                                                                                                                                                                                                                                                                                                                                                                                                                                                                                                                                                                                                                                                                                                                                                                                                                                                                                                                                                                                                                                                                                                                                                                                                                                                                                                                                                                                                                                                                                                                                                                                                                                                                                                                                                        | -1.35976200                                             |            |             |             |   |             |             |             |   |             |             |             |   |             |             |             |   |             |             |             |   |             |             |             |   |             |             |            |   |             |             |            |   |             |             |            |   |             |             |             |   |             |             |            |   |             |             |            |   |             |             |             |   |             |             |            |   |             |             |             |   |             |             |             |   |             |             |            |   |             |             |             |   |             |             |             |   |             |            |             |    |             |             |            |
| C                                                       | 4.57332600                                                                          | -0.01946000                                                                                                                                                                                                                                                                                                                                                                                                                                                                                                                                                                                                                                                                                                                                                                                                                                                                                                                                                                                                                                                                                                                                                                                                                                                                                                                                                                                                                                                                                                                                                                                                                                                                                                                                                        | 0.10559500                                              |            |             |             |   |             |             |             |   |             |             |             |   |             |             |             |   |             |             |             |   |             |             |             |   |             |             |            |   |             |             |            |   |             |             |            |   |             |             |             |   |             |             |            |   |             |             |            |   |             |             |             |   |             |             |            |   |             |             |             |   |             |             |             |   |             |             |            |   |             |             |             |   |             |             |             |   |             |            |             |    |             |             |            |
| O                                                       | 5.08414200                                                                          | 1.06795300                                                                                                                                                                                                                                                                                                                                                                                                                                                                                                                                                                                                                                                                                                                                                                                                                                                                                                                                                                                                                                                                                                                                                                                                                                                                                                                                                                                                                                                                                                                                                                                                                                                                                                                                                         | -0.23875800                                             |            |             |             |   |             |             |             |   |             |             |             |   |             |             |             |   |             |             |             |   |             |             |             |   |             |             |            |   |             |             |            |   |             |             |            |   |             |             |             |   |             |             |            |   |             |             |            |   |             |             |             |   |             |             |            |   |             |             |             |   |             |             |             |   |             |             |            |   |             |             |             |   |             |             |             |   |             |            |             |    |             |             |            |
| O                                                       | 5.14286000                                                                          | -1.11947300                                                                                                                                                                                                                                                                                                                                                                                                                                                                                                                                                                                                                                                                                                                                                                                                                                                                                                                                                                                                                                                                                                                                                                                                                                                                                                                                                                                                                                                                                                                                                                                                                                                                                                                                                        | 0.28461300                                              |            |             |             |   |             |             |             |   |             |             |             |   |             |             |             |   |             |             |             |   |             |             |             |   |             |             |            |   |             |             |            |   |             |             |            |   |             |             |             |   |             |             |            |   |             |             |            |   |             |             |             |   |             |             |            |   |             |             |             |   |             |             |             |   |             |             |            |   |             |             |             |   |             |             |             |   |             |            |             |    |             |             |            |
| I                                                       | -1.85717200                                                                         | 0.01453300                                                                                                                                                                                                                                                                                                                                                                                                                                                                                                                                                                                                                                                                                                                                                                                                                                                                                                                                                                                                                                                                                                                                                                                                                                                                                                                                                                                                                                                                                                                                                                                                                                                                                                                                                         | -0.11574200                                             |            |             |             |   |             |             |             |   |             |             |             |   |             |             |             |   |             |             |             |   |             |             |             |   |             |             |            |   |             |             |            |   |             |             |            |   |             |             |             |   |             |             |            |   |             |             |            |   |             |             |             |   |             |             |            |   |             |             |             |   |             |             |             |   |             |             |            |   |             |             |             |   |             |             |             |   |             |            |             |    |             |             |            |
| Cl                                                      | -4.94260600                                                                         | -0.04766700                                                                                                                                                                                                                                                                                                                                                                                                                                                                                                                                                                                                                                                                                                                                                                                                                                                                                                                                                                                                                                                                                                                                                                                                                                                                                                                                                                                                                                                                                                                                                                                                                                                                                                                                                        | 0.25147300                                              |            |             |             |   |             |             |             |   |             |             |             |   |             |             |             |   |             |             |             |   |             |             |             |   |             |             |            |   |             |             |            |   |             |             |            |   |             |             |             |   |             |             |            |   |             |             |            |   |             |             |             |   |             |             |            |   |             |             |             |   |             |             |             |   |             |             |            |   |             |             |             |   |             |             |             |   |             |            |             |    |             |             |            |
|                                                         |  | <table> <tbody> <tr><td colspan="4"><b>4[CO<sub>2</sub><sup>-</sup>,N-I]:Br<sup>-</sup></b></td></tr> <tr><td>N</td><td>-0.85132200</td><td>0.04257200</td><td>-0.43842900</td></tr> <tr><td>C</td><td>-1.45293000</td><td>1.19520300</td><td>0.23212400</td></tr> <tr><td>C</td><td>-2.95311500</td><td>1.25805500</td><td>-0.04933900</td></tr> <tr><td>C</td><td>-3.65467600</td><td>-0.01728700</td><td>0.39361000</td></tr> <tr><td>C</td><td>-2.95432900</td><td>-1.21342500</td><td>-0.24123700</td></tr> <tr><td>C</td><td>-1.45474000</td><td>-1.19901500</td><td>0.04517600</td></tr> <tr><td>H</td><td>-3.39397600</td><td>2.12048300</td><td>0.45171600</td></tr> <tr><td>H</td><td>-1.28983000</td><td>1.14427000</td><td>1.32361800</td></tr> <tr><td>H</td><td>-0.95411900</td><td>2.09661400</td><td>-0.12783400</td></tr> <tr><td>H</td><td>-3.53665700</td><td>-0.11143500</td><td>1.48265200</td></tr> <tr><td>H</td><td>-3.40246300</td><td>-2.13611300</td><td>0.12779500</td></tr> <tr><td>H</td><td>-3.10943700</td><td>-1.18436500</td><td>-1.32409000</td></tr> <tr><td>H</td><td>-1.29395600</td><td>-1.31927200</td><td>1.13145100</td></tr> <tr><td>H</td><td>-0.95800100</td><td>-2.03492100</td><td>-0.45028700</td></tr> <tr><td>H</td><td>-3.11495500</td><td>1.39954400</td><td>-1.12083200</td></tr> <tr><td>C</td><td>-5.19518200</td><td>-0.02090800</td><td>0.14325000</td></tr> <tr><td>O</td><td>-5.75201500</td><td>-1.13472100</td><td>0.26258300</td></tr> <tr><td>O</td><td>-5.72006800</td><td>1.08238100</td><td>-0.11926800</td></tr> <tr><td>I</td><td>1.22610000</td><td>0.01858500</td><td>-0.16376200</td></tr> <tr><td>Br</td><td>4.56559500</td><td>-0.02442400</td><td>0.17046200</td></tr> </tbody> </table> | <b>4[CO<sub>2</sub><sup>-</sup>,N-I]:Br<sup>-</sup></b> |            |             |             | N | -0.85132200 | 0.04257200  | -0.43842900 | C | -1.45293000 | 1.19520300  | 0.23212400  | C | -2.95311500 | 1.25805500  | -0.04933900 | C | -3.65467600 | -0.01728700 | 0.39361000  | C | -2.95432900 | -1.21342500 | -0.24123700 | C | -1.45474000 | -1.19901500 | 0.04517600 | H | -3.39397600 | 2.12048300  | 0.45171600 | H | -1.28983000 | 1.14427000  | 1.32361800 | H | -0.95411900 | 2.09661400  | -0.12783400 | H | -3.53665700 | -0.11143500 | 1.48265200 | H | -3.40246300 | -2.13611300 | 0.12779500 | H | -3.10943700 | -1.18436500 | -1.32409000 | H | -1.29395600 | -1.31927200 | 1.13145100 | H | -0.95800100 | -2.03492100 | -0.45028700 | H | -3.11495500 | 1.39954400  | -1.12083200 | C | -5.19518200 | -0.02090800 | 0.14325000 | O | -5.75201500 | -1.13472100 | 0.26258300  | O | -5.72006800 | 1.08238100  | -0.11926800 | I | 1.22610000  | 0.01858500 | -0.16376200 | Br | 4.56559500  | -0.02442400 | 0.17046200 |
| <b>4[CO<sub>2</sub><sup>-</sup>,N-I]:Br<sup>-</sup></b> |                                                                                     |                                                                                                                                                                                                                                                                                                                                                                                                                                                                                                                                                                                                                                                                                                                                                                                                                                                                                                                                                                                                                                                                                                                                                                                                                                                                                                                                                                                                                                                                                                                                                                                                                                                                                                                                                                    |                                                         |            |             |             |   |             |             |             |   |             |             |             |   |             |             |             |   |             |             |             |   |             |             |             |   |             |             |            |   |             |             |            |   |             |             |            |   |             |             |             |   |             |             |            |   |             |             |            |   |             |             |             |   |             |             |            |   |             |             |             |   |             |             |             |   |             |             |            |   |             |             |             |   |             |             |             |   |             |            |             |    |             |             |            |
| N                                                       | -0.85132200                                                                         | 0.04257200                                                                                                                                                                                                                                                                                                                                                                                                                                                                                                                                                                                                                                                                                                                                                                                                                                                                                                                                                                                                                                                                                                                                                                                                                                                                                                                                                                                                                                                                                                                                                                                                                                                                                                                                                         | -0.43842900                                             |            |             |             |   |             |             |             |   |             |             |             |   |             |             |             |   |             |             |             |   |             |             |             |   |             |             |            |   |             |             |            |   |             |             |            |   |             |             |             |   |             |             |            |   |             |             |            |   |             |             |             |   |             |             |            |   |             |             |             |   |             |             |             |   |             |             |            |   |             |             |             |   |             |             |             |   |             |            |             |    |             |             |            |
| C                                                       | -1.45293000                                                                         | 1.19520300                                                                                                                                                                                                                                                                                                                                                                                                                                                                                                                                                                                                                                                                                                                                                                                                                                                                                                                                                                                                                                                                                                                                                                                                                                                                                                                                                                                                                                                                                                                                                                                                                                                                                                                                                         | 0.23212400                                              |            |             |             |   |             |             |             |   |             |             |             |   |             |             |             |   |             |             |             |   |             |             |             |   |             |             |            |   |             |             |            |   |             |             |            |   |             |             |             |   |             |             |            |   |             |             |            |   |             |             |             |   |             |             |            |   |             |             |             |   |             |             |             |   |             |             |            |   |             |             |             |   |             |             |             |   |             |            |             |    |             |             |            |
| C                                                       | -2.95311500                                                                         | 1.25805500                                                                                                                                                                                                                                                                                                                                                                                                                                                                                                                                                                                                                                                                                                                                                                                                                                                                                                                                                                                                                                                                                                                                                                                                                                                                                                                                                                                                                                                                                                                                                                                                                                                                                                                                                         | -0.04933900                                             |            |             |             |   |             |             |             |   |             |             |             |   |             |             |             |   |             |             |             |   |             |             |             |   |             |             |            |   |             |             |            |   |             |             |            |   |             |             |             |   |             |             |            |   |             |             |            |   |             |             |             |   |             |             |            |   |             |             |             |   |             |             |             |   |             |             |            |   |             |             |             |   |             |             |             |   |             |            |             |    |             |             |            |
| C                                                       | -3.65467600                                                                         | -0.01728700                                                                                                                                                                                                                                                                                                                                                                                                                                                                                                                                                                                                                                                                                                                                                                                                                                                                                                                                                                                                                                                                                                                                                                                                                                                                                                                                                                                                                                                                                                                                                                                                                                                                                                                                                        | 0.39361000                                              |            |             |             |   |             |             |             |   |             |             |             |   |             |             |             |   |             |             |             |   |             |             |             |   |             |             |            |   |             |             |            |   |             |             |            |   |             |             |             |   |             |             |            |   |             |             |            |   |             |             |             |   |             |             |            |   |             |             |             |   |             |             |             |   |             |             |            |   |             |             |             |   |             |             |             |   |             |            |             |    |             |             |            |
| C                                                       | -2.95432900                                                                         | -1.21342500                                                                                                                                                                                                                                                                                                                                                                                                                                                                                                                                                                                                                                                                                                                                                                                                                                                                                                                                                                                                                                                                                                                                                                                                                                                                                                                                                                                                                                                                                                                                                                                                                                                                                                                                                        | -0.24123700                                             |            |             |             |   |             |             |             |   |             |             |             |   |             |             |             |   |             |             |             |   |             |             |             |   |             |             |            |   |             |             |            |   |             |             |            |   |             |             |             |   |             |             |            |   |             |             |            |   |             |             |             |   |             |             |            |   |             |             |             |   |             |             |             |   |             |             |            |   |             |             |             |   |             |             |             |   |             |            |             |    |             |             |            |
| C                                                       | -1.45474000                                                                         | -1.19901500                                                                                                                                                                                                                                                                                                                                                                                                                                                                                                                                                                                                                                                                                                                                                                                                                                                                                                                                                                                                                                                                                                                                                                                                                                                                                                                                                                                                                                                                                                                                                                                                                                                                                                                                                        | 0.04517600                                              |            |             |             |   |             |             |             |   |             |             |             |   |             |             |             |   |             |             |             |   |             |             |             |   |             |             |            |   |             |             |            |   |             |             |            |   |             |             |             |   |             |             |            |   |             |             |            |   |             |             |             |   |             |             |            |   |             |             |             |   |             |             |             |   |             |             |            |   |             |             |             |   |             |             |             |   |             |            |             |    |             |             |            |
| H                                                       | -3.39397600                                                                         | 2.12048300                                                                                                                                                                                                                                                                                                                                                                                                                                                                                                                                                                                                                                                                                                                                                                                                                                                                                                                                                                                                                                                                                                                                                                                                                                                                                                                                                                                                                                                                                                                                                                                                                                                                                                                                                         | 0.45171600                                              |            |             |             |   |             |             |             |   |             |             |             |   |             |             |             |   |             |             |             |   |             |             |             |   |             |             |            |   |             |             |            |   |             |             |            |   |             |             |             |   |             |             |            |   |             |             |            |   |             |             |             |   |             |             |            |   |             |             |             |   |             |             |             |   |             |             |            |   |             |             |             |   |             |             |             |   |             |            |             |    |             |             |            |
| H                                                       | -1.28983000                                                                         | 1.14427000                                                                                                                                                                                                                                                                                                                                                                                                                                                                                                                                                                                                                                                                                                                                                                                                                                                                                                                                                                                                                                                                                                                                                                                                                                                                                                                                                                                                                                                                                                                                                                                                                                                                                                                                                         | 1.32361800                                              |            |             |             |   |             |             |             |   |             |             |             |   |             |             |             |   |             |             |             |   |             |             |             |   |             |             |            |   |             |             |            |   |             |             |            |   |             |             |             |   |             |             |            |   |             |             |            |   |             |             |             |   |             |             |            |   |             |             |             |   |             |             |             |   |             |             |            |   |             |             |             |   |             |             |             |   |             |            |             |    |             |             |            |
| H                                                       | -0.95411900                                                                         | 2.09661400                                                                                                                                                                                                                                                                                                                                                                                                                                                                                                                                                                                                                                                                                                                                                                                                                                                                                                                                                                                                                                                                                                                                                                                                                                                                                                                                                                                                                                                                                                                                                                                                                                                                                                                                                         | -0.12783400                                             |            |             |             |   |             |             |             |   |             |             |             |   |             |             |             |   |             |             |             |   |             |             |             |   |             |             |            |   |             |             |            |   |             |             |            |   |             |             |             |   |             |             |            |   |             |             |            |   |             |             |             |   |             |             |            |   |             |             |             |   |             |             |             |   |             |             |            |   |             |             |             |   |             |             |             |   |             |            |             |    |             |             |            |
| H                                                       | -3.53665700                                                                         | -0.11143500                                                                                                                                                                                                                                                                                                                                                                                                                                                                                                                                                                                                                                                                                                                                                                                                                                                                                                                                                                                                                                                                                                                                                                                                                                                                                                                                                                                                                                                                                                                                                                                                                                                                                                                                                        | 1.48265200                                              |            |             |             |   |             |             |             |   |             |             |             |   |             |             |             |   |             |             |             |   |             |             |             |   |             |             |            |   |             |             |            |   |             |             |            |   |             |             |             |   |             |             |            |   |             |             |            |   |             |             |             |   |             |             |            |   |             |             |             |   |             |             |             |   |             |             |            |   |             |             |             |   |             |             |             |   |             |            |             |    |             |             |            |
| H                                                       | -3.40246300                                                                         | -2.13611300                                                                                                                                                                                                                                                                                                                                                                                                                                                                                                                                                                                                                                                                                                                                                                                                                                                                                                                                                                                                                                                                                                                                                                                                                                                                                                                                                                                                                                                                                                                                                                                                                                                                                                                                                        | 0.12779500                                              |            |             |             |   |             |             |             |   |             |             |             |   |             |             |             |   |             |             |             |   |             |             |             |   |             |             |            |   |             |             |            |   |             |             |            |   |             |             |             |   |             |             |            |   |             |             |            |   |             |             |             |   |             |             |            |   |             |             |             |   |             |             |             |   |             |             |            |   |             |             |             |   |             |             |             |   |             |            |             |    |             |             |            |
| H                                                       | -3.10943700                                                                         | -1.18436500                                                                                                                                                                                                                                                                                                                                                                                                                                                                                                                                                                                                                                                                                                                                                                                                                                                                                                                                                                                                                                                                                                                                                                                                                                                                                                                                                                                                                                                                                                                                                                                                                                                                                                                                                        | -1.32409000                                             |            |             |             |   |             |             |             |   |             |             |             |   |             |             |             |   |             |             |             |   |             |             |             |   |             |             |            |   |             |             |            |   |             |             |            |   |             |             |             |   |             |             |            |   |             |             |            |   |             |             |             |   |             |             |            |   |             |             |             |   |             |             |             |   |             |             |            |   |             |             |             |   |             |             |             |   |             |            |             |    |             |             |            |
| H                                                       | -1.29395600                                                                         | -1.31927200                                                                                                                                                                                                                                                                                                                                                                                                                                                                                                                                                                                                                                                                                                                                                                                                                                                                                                                                                                                                                                                                                                                                                                                                                                                                                                                                                                                                                                                                                                                                                                                                                                                                                                                                                        | 1.13145100                                              |            |             |             |   |             |             |             |   |             |             |             |   |             |             |             |   |             |             |             |   |             |             |             |   |             |             |            |   |             |             |            |   |             |             |            |   |             |             |             |   |             |             |            |   |             |             |            |   |             |             |             |   |             |             |            |   |             |             |             |   |             |             |             |   |             |             |            |   |             |             |             |   |             |             |             |   |             |            |             |    |             |             |            |
| H                                                       | -0.95800100                                                                         | -2.03492100                                                                                                                                                                                                                                                                                                                                                                                                                                                                                                                                                                                                                                                                                                                                                                                                                                                                                                                                                                                                                                                                                                                                                                                                                                                                                                                                                                                                                                                                                                                                                                                                                                                                                                                                                        | -0.45028700                                             |            |             |             |   |             |             |             |   |             |             |             |   |             |             |             |   |             |             |             |   |             |             |             |   |             |             |            |   |             |             |            |   |             |             |            |   |             |             |             |   |             |             |            |   |             |             |            |   |             |             |             |   |             |             |            |   |             |             |             |   |             |             |             |   |             |             |            |   |             |             |             |   |             |             |             |   |             |            |             |    |             |             |            |
| H                                                       | -3.11495500                                                                         | 1.39954400                                                                                                                                                                                                                                                                                                                                                                                                                                                                                                                                                                                                                                                                                                                                                                                                                                                                                                                                                                                                                                                                                                                                                                                                                                                                                                                                                                                                                                                                                                                                                                                                                                                                                                                                                         | -1.12083200                                             |            |             |             |   |             |             |             |   |             |             |             |   |             |             |             |   |             |             |             |   |             |             |             |   |             |             |            |   |             |             |            |   |             |             |            |   |             |             |             |   |             |             |            |   |             |             |            |   |             |             |             |   |             |             |            |   |             |             |             |   |             |             |             |   |             |             |            |   |             |             |             |   |             |             |             |   |             |            |             |    |             |             |            |
| C                                                       | -5.19518200                                                                         | -0.02090800                                                                                                                                                                                                                                                                                                                                                                                                                                                                                                                                                                                                                                                                                                                                                                                                                                                                                                                                                                                                                                                                                                                                                                                                                                                                                                                                                                                                                                                                                                                                                                                                                                                                                                                                                        | 0.14325000                                              |            |             |             |   |             |             |             |   |             |             |             |   |             |             |             |   |             |             |             |   |             |             |             |   |             |             |            |   |             |             |            |   |             |             |            |   |             |             |             |   |             |             |            |   |             |             |            |   |             |             |             |   |             |             |            |   |             |             |             |   |             |             |             |   |             |             |            |   |             |             |             |   |             |             |             |   |             |            |             |    |             |             |            |
| O                                                       | -5.75201500                                                                         | -1.13472100                                                                                                                                                                                                                                                                                                                                                                                                                                                                                                                                                                                                                                                                                                                                                                                                                                                                                                                                                                                                                                                                                                                                                                                                                                                                                                                                                                                                                                                                                                                                                                                                                                                                                                                                                        | 0.26258300                                              |            |             |             |   |             |             |             |   |             |             |             |   |             |             |             |   |             |             |             |   |             |             |             |   |             |             |            |   |             |             |            |   |             |             |            |   |             |             |             |   |             |             |            |   |             |             |            |   |             |             |             |   |             |             |            |   |             |             |             |   |             |             |             |   |             |             |            |   |             |             |             |   |             |             |             |   |             |            |             |    |             |             |            |
| O                                                       | -5.72006800                                                                         | 1.08238100                                                                                                                                                                                                                                                                                                                                                                                                                                                                                                                                                                                                                                                                                                                                                                                                                                                                                                                                                                                                                                                                                                                                                                                                                                                                                                                                                                                                                                                                                                                                                                                                                                                                                                                                                         | -0.11926800                                             |            |             |             |   |             |             |             |   |             |             |             |   |             |             |             |   |             |             |             |   |             |             |             |   |             |             |            |   |             |             |            |   |             |             |            |   |             |             |             |   |             |             |            |   |             |             |            |   |             |             |             |   |             |             |            |   |             |             |             |   |             |             |             |   |             |             |            |   |             |             |             |   |             |             |             |   |             |            |             |    |             |             |            |
| I                                                       | 1.22610000                                                                          | 0.01858500                                                                                                                                                                                                                                                                                                                                                                                                                                                                                                                                                                                                                                                                                                                                                                                                                                                                                                                                                                                                                                                                                                                                                                                                                                                                                                                                                                                                                                                                                                                                                                                                                                                                                                                                                         | -0.16376200                                             |            |             |             |   |             |             |             |   |             |             |             |   |             |             |             |   |             |             |             |   |             |             |             |   |             |             |            |   |             |             |            |   |             |             |            |   |             |             |             |   |             |             |            |   |             |             |            |   |             |             |             |   |             |             |            |   |             |             |             |   |             |             |             |   |             |             |            |   |             |             |             |   |             |             |             |   |             |            |             |    |             |             |            |
| Br                                                      | 4.56559500                                                                          | -0.02442400                                                                                                                                                                                                                                                                                                                                                                                                                                                                                                                                                                                                                                                                                                                                                                                                                                                                                                                                                                                                                                                                                                                                                                                                                                                                                                                                                                                                                                                                                                                                                                                                                                                                                                                                                        | 0.17046200                                              |            |             |             |   |             |             |             |   |             |             |             |   |             |             |             |   |             |             |             |   |             |             |             |   |             |             |            |   |             |             |            |   |             |             |            |   |             |             |             |   |             |             |            |   |             |             |            |   |             |             |             |   |             |             |            |   |             |             |             |   |             |             |             |   |             |             |            |   |             |             |             |   |             |             |             |   |             |            |             |    |             |             |            |

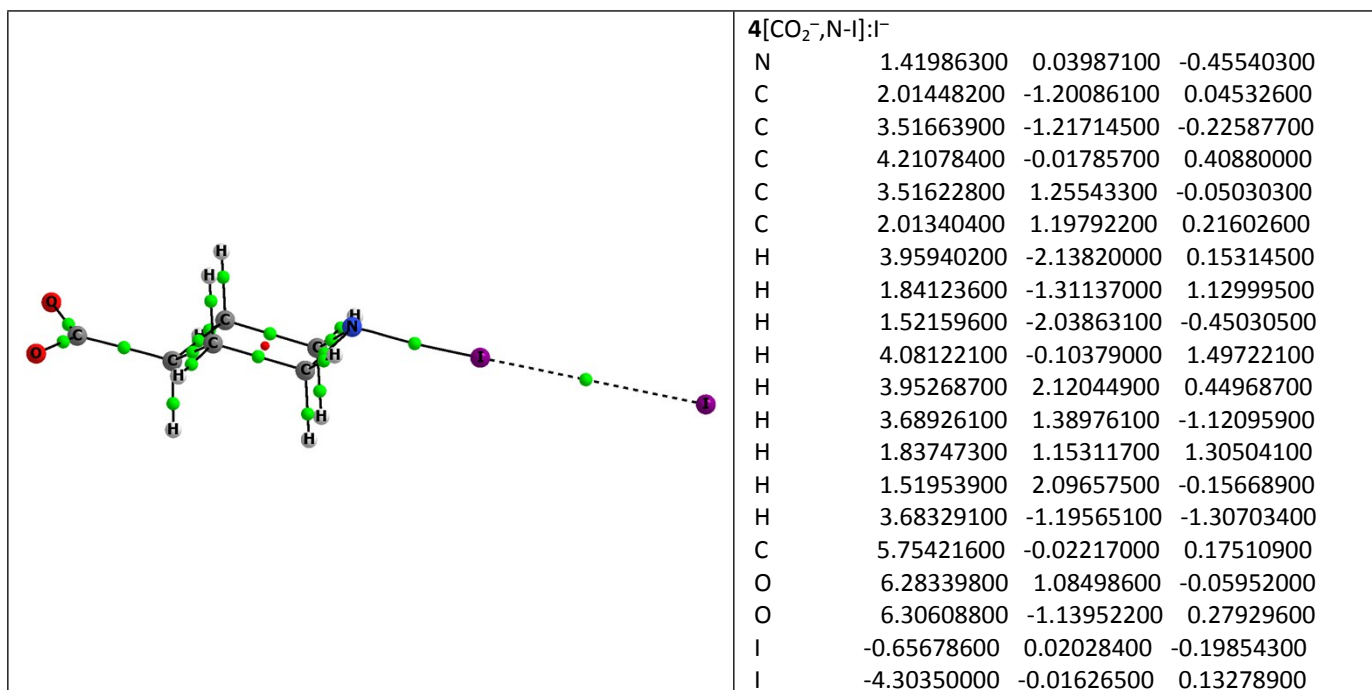

**Table S2.** Difference between the binding energy of hydrogen-bonded (HB) and halogen-bonded cation-cation complexes ( $E_{rel}$  in  $\text{kJ}\cdot\text{mol}^{-1}$ ). Negative values indicate that HB is more stable than halogen-bonded systems.

|                                                    | $E_{rel}$ |
|----------------------------------------------------|-----------|
| 1[NH <sub>3</sub> (+), N]:ClNH <sub>3</sub> (+) HB | 5.5       |
| 1[NH <sub>3</sub> (+), N]:BrNH <sub>3</sub> (+) HB | 34.5      |
| 1[NH <sub>3</sub> (+), N]:INH <sub>3</sub> (+) HB  | 55.4      |
|                                                    |           |
| 2[NH <sub>3</sub> (+), N]:ClNH <sub>3</sub> (+) HB | -1.1      |
| 2[NH <sub>3</sub> (+), N]:BrNH <sub>3</sub> (+) HB | 49.2      |
| 2[NH <sub>3</sub> (+), N]:INH <sub>3</sub> (+) HB  | 74.2      |
|                                                    |           |
| 3[NH <sub>3</sub> (+), N]:ClNH <sub>3</sub> (+) HB | -1.8      |
| 3[NH <sub>3</sub> (+), N]:BrNH <sub>3</sub> (+) HB | 36.2      |
| 3[NH <sub>3</sub> (+), N]:INH <sub>3</sub> (+) HB  | 71.8      |

**Table S3.** Basis set superposition error (BSSE in  $\text{kJ}\cdot\text{mol}^{-1}$ ) for selected ion-ion complexes and their corresponding transition states (TS).

|                                                                   | Minimum | TS  |
|-------------------------------------------------------------------|---------|-----|
| 1[NH <sub>3</sub> <sup>+</sup> ,N]:ClNH <sub>3</sub> <sup>+</sup> | 0.9     | 0.2 |
| 1[NH <sub>3</sub> <sup>+</sup> ,N]:BrNH <sub>3</sub> <sup>+</sup> | 1.4     | 0.2 |
| 1[NH <sub>3</sub> <sup>+</sup> ,N]:INH <sub>3</sub> <sup>+</sup>  | 0.7     | 0.2 |
|                                                                   |         |     |
| 1[CO <sub>2</sub> <sup>-</sup> ,Cl]:F <sup>-</sup>                | 0.9     | 0.1 |
| 1[CO <sub>2</sub> <sup>-</sup> ,Cl]:Cl <sup>-</sup>               | 0.3     | 0.1 |
| 1[CO <sub>2</sub> <sup>-</sup> ,Cl]:Br <sup>-</sup>               | 0.4     | 0.2 |

**Table S4.** Relative binding energies ( $E_{rel}$  in  $\text{kJ}\cdot\text{mol}^{-1}$ ) of complexes **1** $[\text{NH}_3^+, \text{N}]:\text{XNH}_3^+$  and **4** $[\text{CO}_2^-, \text{NI}]:\text{Y}^-$  with three explicit water molecules. Complex A shows halogen bond and complex B shows a water molecule linking the two charged systems.

|                                                                  | $E_{rel}(\text{kJ}\cdot\text{mol}^{-1})$ |
|------------------------------------------------------------------|------------------------------------------|
| <b>1</b> $[\text{NH}_3^+, \text{N}]:\text{ClNH}_3^+_{\_A}$       | 0.0                                      |
| <b>1</b> $[\text{NH}_3^+, \text{N}]:\text{ClNH}_3^+_{\_B}$       | 16.9                                     |
| <b>1</b> $[\text{NH}_3^+, \text{N}]:\text{BrNH}_3^+_{\_A}$       | 0.0                                      |
| <b>1</b> $[\text{NH}_3^+, \text{N}]:\text{BrNH}_3^+_{\_B}$       | 12.8                                     |
| <b>1</b> $[\text{NH}_3^+, \text{N}]:\text{INH}_3^+_{\_A}$        | 0.0                                      |
| <b>1</b> $[\text{NH}_3^+, \text{N}]:\text{INH}_3^+_{\_B}$        | 5.4                                      |
|                                                                  |                                          |
| <b>4</b> $[\text{CO}_2^-, \text{NI}]:\text{F}^-_{\_A}$           | 0.0                                      |
| <b>4</b> $[\text{CO}_2^-, \text{NI}]:\text{F}^-_{\_B}$           | 6.8                                      |
| <b>4</b> $[\text{CO}_2^-, \text{NI}]:\text{Cl}^-_{\_A}$          | 0.0                                      |
| <b>4</b> $[\text{CO}_2^-, \text{NI}]:\text{Cl}^-_{\_B}$          | 0.6                                      |
| <b>4</b> $[\text{CO}_2^-, \text{NI}]:\text{Br}^-_{\_A}$          | 0.0                                      |
| <b>4</b> $[\text{CO}_2^-, \text{NI}]:\text{Br}^-_{\_B}$          | -0.8                                     |
| <b>4</b> $[\text{CO}_2^-, \text{NI}]:\text{I}^-_{\_A}$           | 0.0                                      |
| <b>4</b> $[\text{CO}_2^-, \text{NI}]:\text{I}^-_{\_B}$           | -3.0                                     |
|                                                                  |                                          |
| <b>1</b> $[\text{NH}_3^+, \text{N}]:\text{ClNH}_3^+_{\_A}$ (PCM) | 0.0                                      |
| <b>1</b> $[\text{NH}_3^+, \text{N}]:\text{ClNH}_3^+_{\_B}$ (PCM) | 13.2                                     |
| <b>4</b> $[\text{CO}_2^-, \text{NI}]:\text{F}^-_{\_A}$ (PCM)     | 0.0                                      |
| <b>4</b> $[\text{CO}_2^-, \text{NI}]:\text{F}^-_{\_B}$ (PCM)     | 8.7                                      |

**Table S5.** Electron density ( $\rho_{\text{BCP}}$ ), Laplacian ( $\nabla^2\rho_{\text{BCP}}$ ) and total electron density energy ( $H_{\text{BCP}}$ ), in a.u., for the intermolecular bond critical point in all complexes in gas phase.

| Complex                                                           | $\rho_{\text{BCP}}$ | $\nabla^2\rho_{\text{BCP}}$ | $H_{\text{BCP}}$ |
|-------------------------------------------------------------------|---------------------|-----------------------------|------------------|
| 1[NH <sub>3</sub> <sup>+</sup> ,N]:CINH <sub>3</sub> <sup>+</sup> | 0.0627              | 0.1256                      | -0.0119          |
| 1[NH <sub>3</sub> <sup>+</sup> ,N]:BrNH <sub>3</sub> <sup>+</sup> | 0.0761              | 0.1026                      | -0.0235          |
| 1[NH <sub>3</sub> <sup>+</sup> ,N]:INH <sub>3</sub> <sup>+</sup>  | 0.0638              | 0.1130                      | -0.0181          |
| 2[NH <sub>3</sub> <sup>+</sup> ,N]:CINH <sub>3</sub> <sup>+</sup> | 0.1171              | 0.1011                      | -0.0467          |
| 2[NH <sub>3</sub> <sup>+</sup> ,N]:BrNH <sub>3</sub> <sup>+</sup> | 0.0986              | 0.0853                      | -0.0410          |
| 2[NH <sub>3</sub> <sup>+</sup> ,N]:INH <sub>3</sub> <sup>+</sup>  | 0.0764              | 0.1185                      | -0.0269          |
| 3[NH <sub>3</sub> <sup>+</sup> ,N]:CINH <sub>3</sub> <sup>+</sup> | 0.1148              | 0.0879                      | -0.0445          |
| 3[NH <sub>3</sub> <sup>+</sup> ,N]:BrNH <sub>3</sub> <sup>+</sup> | 0.0950              | 0.0730                      | -0.0376          |
| 3[NH <sub>3</sub> <sup>+</sup> ,N]:INH <sub>3</sub> <sup>+</sup>  | 0.0737              | 0.0986                      | -0.0251          |
| 1[CO <sub>2</sub> <sup>-</sup> ,C-Br]:F <sup>-</sup>              | 0.0262              | 0.1059                      | 0.0024           |
| 1[CO <sub>2</sub> <sup>-</sup> ,C-I]:F <sup>-</sup>               | 0.0452              | 0.1554                      | -0.0027          |
| 1[CO <sub>2</sub> <sup>-</sup> ,C-I]:Cl <sup>-</sup>              | 0.0135              | 0.0388                      | 0.0011           |
| 1[CO <sub>2</sub> <sup>-</sup> ,C-I]:Br <sup>-</sup>              | 0.0103              | 0.0271                      | 0.0009           |
| 2[CO <sub>2</sub> <sup>-</sup> ,C-Br]:F <sup>-</sup>              | 0.0221              | 0.0882                      | 0.0023           |
| 2[CO <sub>2</sub> <sup>-</sup> ,C-I]:F <sup>-</sup>               | 0.0400              | 0.1412                      | -0.0009          |
| 2[CO <sub>2</sub> <sup>-</sup> ,C-I]:Cl <sup>-</sup>              | 0.0106              | 0.0305                      | 0.0011           |
| 2[CO <sub>2</sub> <sup>-</sup> ,C-I]:Br <sup>-</sup>              | 0.0071              | 0.0184                      | 0.0008           |
| 3[CO <sub>2</sub> <sup>-</sup> ,C-Br]:F <sup>-</sup>              | 0.0204              | 0.0804                      | 0.0022           |
| 3[CO <sub>2</sub> <sup>-</sup> ,C-I]:F <sup>-</sup>               | 0.0393              | 0.1382                      | -0.0008          |
| 3[CO <sub>2</sub> <sup>-</sup> ,C-I]:Cl <sup>-</sup>              | 0.0095              | 0.0268                      | 0.0011           |
| 4[CO <sub>2</sub> <sup>-</sup> ,N-Br]:F <sup>-</sup>              | 0.0468              | 0.1622                      | -0.0016          |
| 4[CO <sub>2</sub> <sup>-</sup> ,N-Br]:Cl <sup>-</sup>             | 0.0125              | 0.0384                      | 0.0013           |
| 4[CO <sub>2</sub> <sup>-</sup> ,N-Br]:Br <sup>-</sup>             | 0.0076              | 0.0216                      | 0.0009           |
| 4[CO <sub>2</sub> <sup>-</sup> ,N-I]:F <sup>-</sup>               | 0.0609              | 0.1869                      | -0.0104          |
| 4[CO <sub>2</sub> <sup>-</sup> ,N-I]:Cl <sup>-</sup>              | 0.0214              | 0.0551                      | 0.0001           |
| 4[CO <sub>2</sub> <sup>-</sup> ,N-I]:Br <sup>-</sup>              | 0.0165              | 0.0397                      | 0.0004           |
| 4[CO <sub>2</sub> <sup>-</sup> ,N-I]:I <sup>-</sup>               | 0.0123              | 0.0275                      | 0.0005           |

**Table S6.** DF-DFT-symmetry-adapted perturbation theory (SAPT) electrostatic, exchange, induction, and Hartree-Fock higher-order energy contributions ( $E_{el}$ ,  $E_{exch}$ ,  $E_i$ , and  $\delta HF$ , respectively) of ion-ion complexes. Energies in  $\text{kJ}\cdot\text{mol}^{-1}$ .

| Comp.                                                                  | $E_{el}$ | $E_{exch}$ | $E_i$  | $\delta HF$ |
|------------------------------------------------------------------------|----------|------------|--------|-------------|
| 1[NH <sub>3</sub> <sup>+</sup> ,N]:CINH <sub>3</sub> <sup>+</sup>      | 60.7     | 197.5      | -49.8  | -46.3       |
| 1[NH <sub>3</sub> <sup>+</sup> ,N]:BrNH <sub>3</sub> <sup>+</sup>      | 1.2      | 290.7      | -105.8 | -45.1       |
| 1[NH <sub>3</sub> <sup>+</sup> ,N]:INH <sub>3</sub> <sup>+</sup>       | 1.5      | 224.6      | -228.2 | 115.3       |
| 1[NH <sub>3</sub> <sup>+</sup> ,N]:CINH <sub>3</sub> <sup>+</sup> (TS) | 141.9    | 1.7        | -5.4   | -0.3        |
| 1[NH <sub>3</sub> <sup>+</sup> ,N]:BrNH <sub>3</sub> <sup>+</sup> (TS) | 138.4    | 0.5        | -5.5   | -0.4        |
| 1[NH <sub>3</sub> <sup>+</sup> ,N]:INH <sub>3</sub> <sup>+</sup> (TS)  | 140.1    | 1.1        | -5.4   | 0.0         |
| 2[NH <sub>3</sub> <sup>+</sup> ,N]:CINH <sub>3</sub> <sup>+</sup>      | -106.3   | 505.7      | -179.6 | -117.5      |
| 2[NH <sub>3</sub> <sup>+</sup> ,N]:BrNH <sub>3</sub> <sup>+</sup>      | -101.0   | 441.0      | -200.1 | -45.3       |
| 2[NH <sub>3</sub> <sup>+</sup> ,N]:INH <sub>3</sub> <sup>+</sup>       | -74.5    | 296.8      | -361.9 | 225.1       |
| 2[NH <sub>3</sub> <sup>+</sup> ,N]:CINH <sub>3</sub> <sup>+</sup> (TS) | 135.2    | 0.5        | -3.9   | -0.2        |
| 2[NH <sub>3</sub> <sup>+</sup> ,N]:BrNH <sub>3</sub> <sup>+</sup> (TS) | 133.1    | 0.3        | -3.8   | -0.1        |
| 2[NH <sub>3</sub> <sup>+</sup> ,N]:INH <sub>3</sub> <sup>+</sup> (TS)  | 132.7    | 0.3        | -4.4   | -0.1        |
| 3[NH <sub>3</sub> <sup>+</sup> ,N]:CINH <sub>3</sub> <sup>+</sup>      | -93.3    | 504.3      | -174.4 | -125.9      |
| 3[NH <sub>3</sub> <sup>+</sup> ,N]:BrNH <sub>3</sub> <sup>+</sup>      | -79.3    | 428.2      | -185.2 | -54.5       |
| 3[NH <sub>3</sub> <sup>+</sup> ,N]:INH <sub>3</sub> <sup>+</sup>       | -52.5    | 293.8      | -348.5 | 209.8       |
| 3[NH <sub>3</sub> <sup>+</sup> ,N]:CINH <sub>3</sub> <sup>+</sup> (TS) | 147.8    | 0.8        | -5.3   | -0.2        |
| 3[NH <sub>3</sub> <sup>+</sup> ,N]:BrNH <sub>3</sub> <sup>+</sup> (TS) | 146.3    | 0.6        | -5.5   | -0.3        |
| 3[NH <sub>3</sub> <sup>+</sup> ,N]:INH <sub>3</sub> <sup>+</sup> (TS)  | 145.3    | 0.4        | -6.0   | -0.1        |
| 1[CO <sub>2</sub> <sup>-</sup> ,C-Br]:F <sup>-</sup>                   | 127.4    | 104.9      | -56.6  | 62.3        |
| 1[CO <sub>2</sub> <sup>-</sup> ,C-I]:F <sup>-</sup>                    | 9.8      | 217.6      | -283.2 | 115.9       |
| 1[CO <sub>2</sub> <sup>-</sup> ,C-I]:Cl <sup>-</sup>                   | 129.7    | 42.5       | -72.5  | 36.7        |
| 1[CO <sub>2</sub> <sup>-</sup> ,C-I]:Br <sup>-</sup>                   | 135.0    | 29.8       | -56.0  | 30.7        |
| 1[CO <sub>2</sub> <sup>-</sup> ,C-Br]:F <sup>-</sup> (TS)              | 163.2    | 5.7        | -18.7  | 0.6         |
| 1[CO <sub>2</sub> <sup>-</sup> ,C-I]:F <sup>-</sup> (TS)               | 149.6    | 1.7        | -18.4  | 1.4         |
| 1[CO <sub>2</sub> <sup>-</sup> ,C-I]:Cl <sup>-</sup> (TS)              | 146.7    | 3.4        | -18.8  | 3.7         |
| 1[CO <sub>2</sub> <sup>-</sup> ,C-I]:Br <sup>-</sup> (TS)              | 144.8    | 4.2        | -19.1  | 5.1         |
| 2[CO <sub>2</sub> <sup>-</sup> ,C-Br]:F <sup>-</sup>                   | 152.7    | 85.0       | -52.8  | -6.5        |
| 2[CO <sub>2</sub> <sup>-</sup> ,C-I]:F <sup>-</sup>                    | 51.5     | 192.6      | -248.8 | 94.0        |
| 2[CO <sub>2</sub> <sup>-</sup> ,C-I]:Cl <sup>-</sup>                   | 149.5    | 31.9       | -59.7  | 26.6        |
| 2[CO <sub>2</sub> <sup>-</sup> ,C-I]:Br <sup>-</sup>                   | 152.4    | 18.8       | -41.9  | 7.3         |
| 2[CO <sub>2</sub> <sup>-</sup> ,C-Br]:F <sup>-</sup> (TS)              | 175.2    | 8.7        | -23.2  | 1.0         |
| 2[CO <sub>2</sub> <sup>-</sup> ,C-I]:F <sup>-</sup> (TS)               | 162.6    | 2.7        | -24.6  | 2.5         |
| 2[CO <sub>2</sub> <sup>-</sup> ,C-I]:Cl <sup>-</sup> (TS)              | 157.6    | 5.4        | -24.2  | 5.6         |
| 2[CO <sub>2</sub> <sup>-</sup> ,C-I]:Br <sup>-</sup> (TS)              | 155.1    | 8.0        | -26.8  | 3.4         |
| 3[CO <sub>2</sub> <sup>-</sup> ,C-Br]:F <sup>-</sup>                   | 163.5    | 75.9       | -49.3  | -5.8        |
| 3[CO <sub>2</sub> <sup>-</sup> ,C-I]:F <sup>-</sup>                    | 59.6     | 187.2      | -240.5 | 89.9        |
| 3[CO <sub>2</sub> <sup>-</sup> ,C-I]:Cl <sup>-</sup>                   | 156.5    | 25.5       | -51.3  | 21.5        |
| 3[CO <sub>2</sub> <sup>-</sup> ,C-Br]:F <sup>-</sup> (TS)              | 181.0    | 9.9        | -23.7  | 0.9         |
| 3[CO <sub>2</sub> <sup>-</sup> ,C-I]:F <sup>-</sup> (TS)               | 166.7    | 3.2        | -25.3  | 2.7         |
| 3[CO <sub>2</sub> <sup>-</sup> ,C-I]:Cl <sup>-</sup> (TS)              | 161.4    | 6.9        | -26.3  | 6.8         |
| 4[CO <sub>2</sub> <sup>-</sup> ,N-Br]:F <sup>-</sup>                   | 64.2     | 221.9      | -94.8  | -24.9       |
| 4[CO <sub>2</sub> <sup>-</sup> ,N-Br]:Cl <sup>-</sup>                  | 149.3    | 43.2       | -25.6  | -5.1        |
| 4[CO <sub>2</sub> <sup>-</sup> ,N-Br]:Br <sup>-</sup>                  | 153.2    | 22.8       | -17.8  | -2.4        |

|                                                            |       |       |        |       |
|------------------------------------------------------------|-------|-------|--------|-------|
| 4[CO <sub>2</sub> <sup>-</sup> ,N-Br]:F <sup>-</sup> (TS)  | 162.5 | 4.6   | -17.8  | 0.8   |
| 4[CO <sub>2</sub> <sup>-</sup> ,N-Br]:Cl <sup>-</sup> (TS) | 157.6 | 9.7   | -15.9  | -0.4  |
| 4[CO <sub>2</sub> <sup>-</sup> ,N-Br]:Br <sup>-</sup> (TS) | 154.8 | 13.1  | -15.1  | -1.0  |
| 4[CO <sub>2</sub> <sup>-</sup> ,N-I]:F <sup>-</sup>        | -71.6 | 323.6 | -415.8 | 184.7 |
| 4[CO <sub>2</sub> <sup>-</sup> ,N-I]:Cl <sup>-</sup>       | 98.4  | 83.7  | -124.0 | 70.9  |
| 4[CO <sub>2</sub> <sup>-</sup> ,N-I]:Br <sup>-</sup>       | 111.7 | 59.8  | -96.6  | 59.9  |
| 4[CO <sub>2</sub> <sup>-</sup> ,N-I]:I <sup>-</sup>        | 119.4 | 41.3  | -81.0  | 58.9  |
| 4[CO <sub>2</sub> <sup>-</sup> ,N-I]:F <sup>-</sup> (TS)   | 146.5 | 1.2   | -16.8  | 1.3   |
| 4[CO <sub>2</sub> <sup>-</sup> ,N-I]:Cl <sup>-</sup> (TS)  | 143.3 | 1.9   | -15.5  | 2.4   |
| 4[CO <sub>2</sub> <sup>-</sup> ,N-I]:Br <sup>-</sup> (TS)  | 141.8 | 2.5   | -15.6  | 3.3   |
| 4[CO <sub>2</sub> <sup>-</sup> ,N-I]:I <sup>-</sup> (TS)   | 139.3 | 3.1   | -16.0  | 5.0   |

**Table S7.** CSD reference codes, contact distances (in Å) and type of intermolecular contact.

|          |       |         |
|----------|-------|---------|
| NUPVUF   | 3.35  | F...F   |
| ANCLA    | 3.27  | F...F   |
| AYUYUP   | 3.166 | F..F    |
| COLKEV   | 3.340 | F...F   |
| FENCOS   | 2.950 | F...F   |
| HOBAC    | 3.012 | F...F   |
| HOBEG    | 3.305 | F...F   |
| HOBBIK   | 3.299 | F..F    |
| ISOXOE   | 3.242 | F...F   |
| LOYWH    | 3.410 | F...F   |
| PIPLIJ   | 3.066 | F...F   |
| RAVKAB   | 2.861 | F...F   |
| RUPSEB   | 3.481 | F...F   |
| RUPSOL   | 3.215 | F...F   |
| RUQCAI   | 3.325 | F...F   |
| VENTUF   | 3.077 | F...F   |
| VUYJEF   | 3.247 | F...F   |
| VUYJEF01 | 3.125 | F...F   |
| XIXYIM   | 3.381 | F...F   |
| YEPBEB   | 3.217 | F...F   |
| ZOGPIU   | 2.746 | F...F   |
| ZUFKES   | 3.056 | F...F   |
| LESRIM   | 3.190 | F...Cl  |
| VAJXIP   | 3.138 | F...Br  |
| CEBIMA   | 3.482 | Cl...Cl |
| XAZDOT   | 3.476 | Cl...Cl |
| SAQLAX   | 3.454 | Cl...Cl |
| UHIVUE   | 3.398 | Cl...Cl |
| UJIKAZ   | 3.427 | Cl...Cl |
| QUBROV   | 3.376 | Cl...Cl |
| JACROV   | 3.379 | Cl...Cl |
| LIJGAN   | 3.465 | Cl...Cl |
| LIJGAN01 | 3.472 | Cl...Cl |
| XEMREM   | 3.483 | Cl...Br |
| XEMRIQ   | 3.477 | Cl...Br |
| YOGDEF   | 3.469 | Br...Br |
| QAVRUC   | 3.496 | Br...Br |
| QUWTUY   | 3.413 | Br...Br |
| ROBZOX   | 3.323 | Cl...N  |
| BIBVEN   | 3.459 | Br...N  |
| EFUXIN   | 3.477 | I...N   |



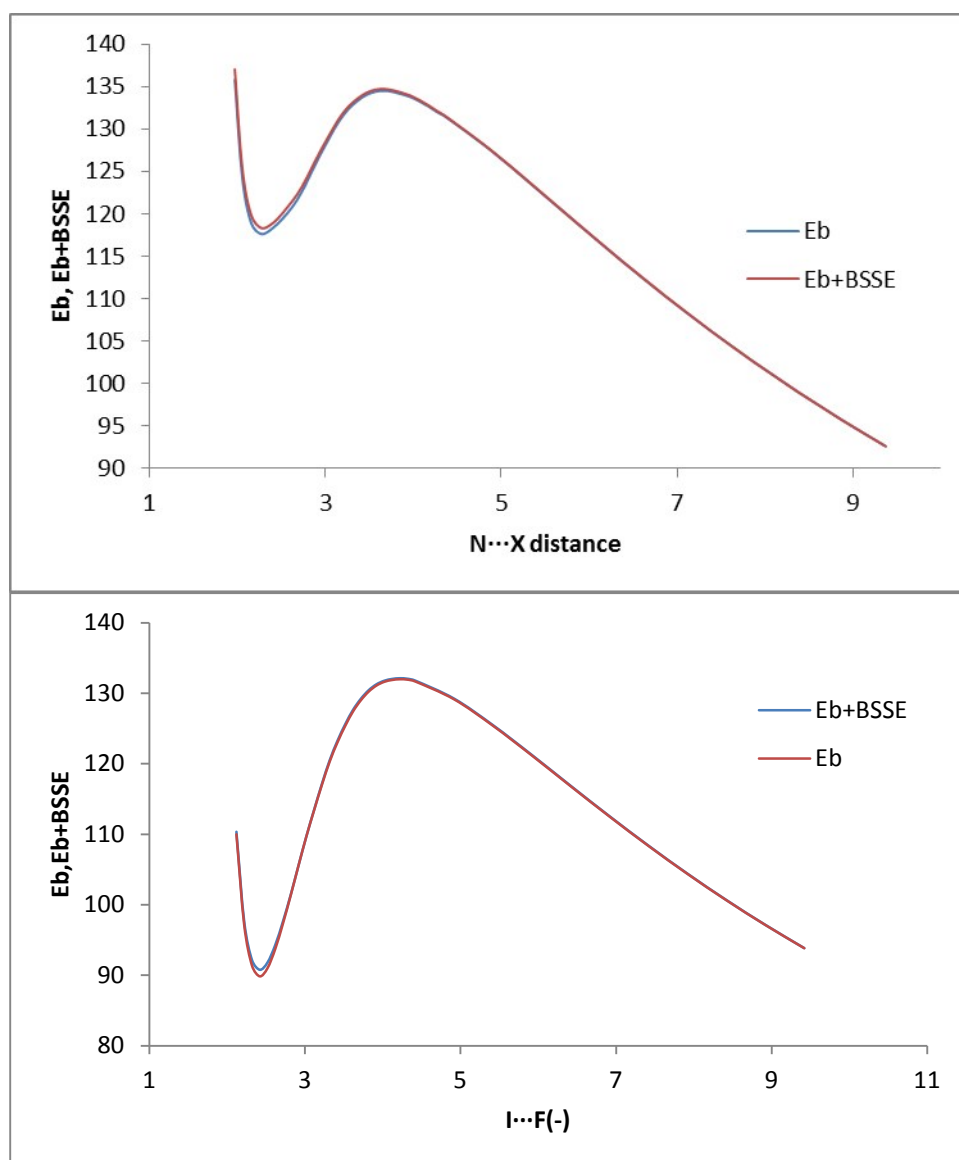

**Figure S1.** Energy (kJ/mol) dissociation profile with BSSE and without BSSE correction of **1**[NH<sub>3</sub>(+), N]:ClNH<sub>3</sub>(+) vs. the N...Cl distance (Å) (top) and Energy (kJ/mol) dissociation profile of **1**[CO<sub>2</sub>(-), Cl]:F(-) vs. the I...F(-) distance (Å) (bottom).

**Figure S2.** Binding energy along the dissociation path.  $E_b$  in  $\text{kJ}\cdot\text{mol}^{-1}$  and distances in  $\text{\AA}$ .

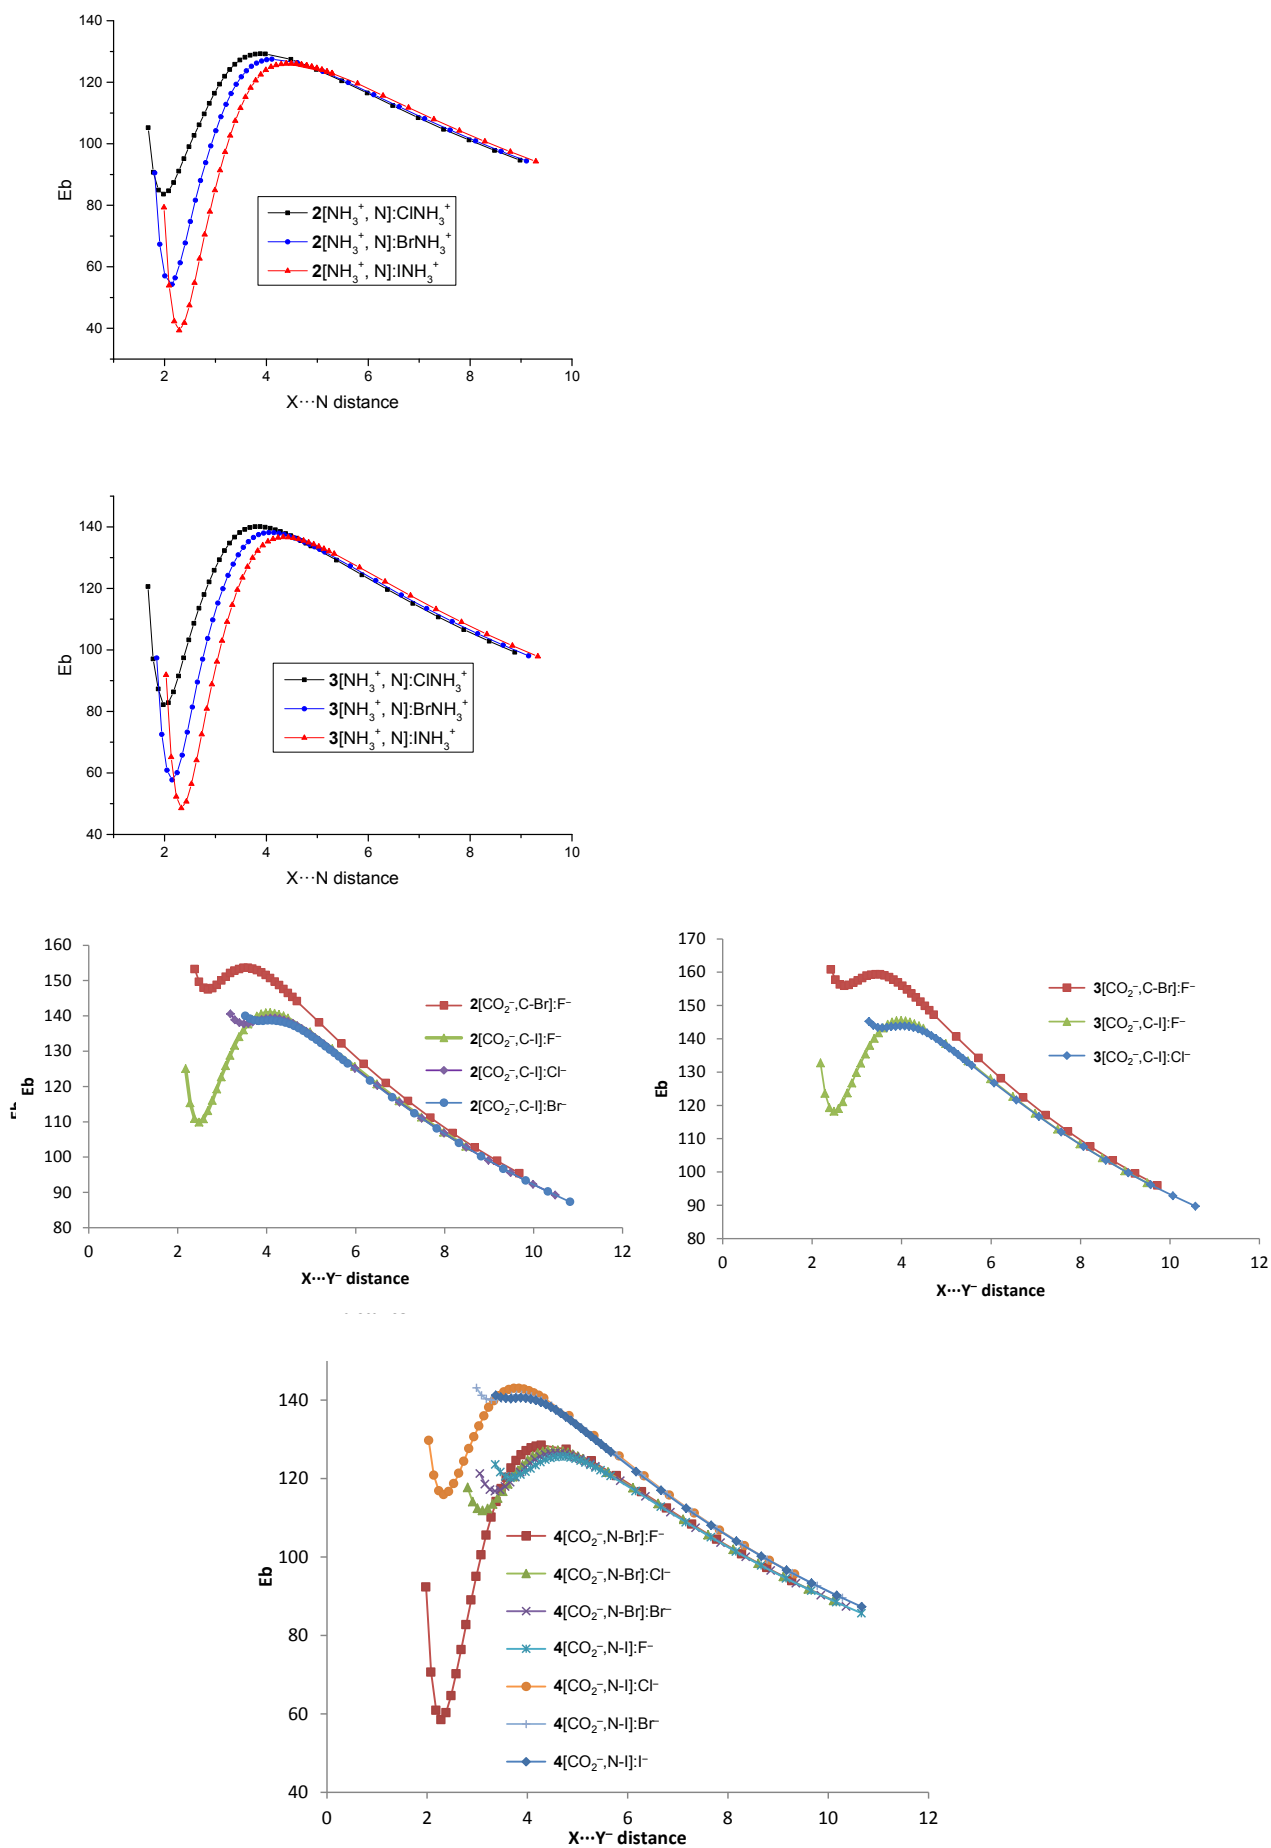

**Figure S3.** Corrected binding energy along the dissociation path.  $E_{\text{corr}}$  in  $\text{kJ}\cdot\text{mol}^{-1}$  and distances in  $\text{\AA}$ .

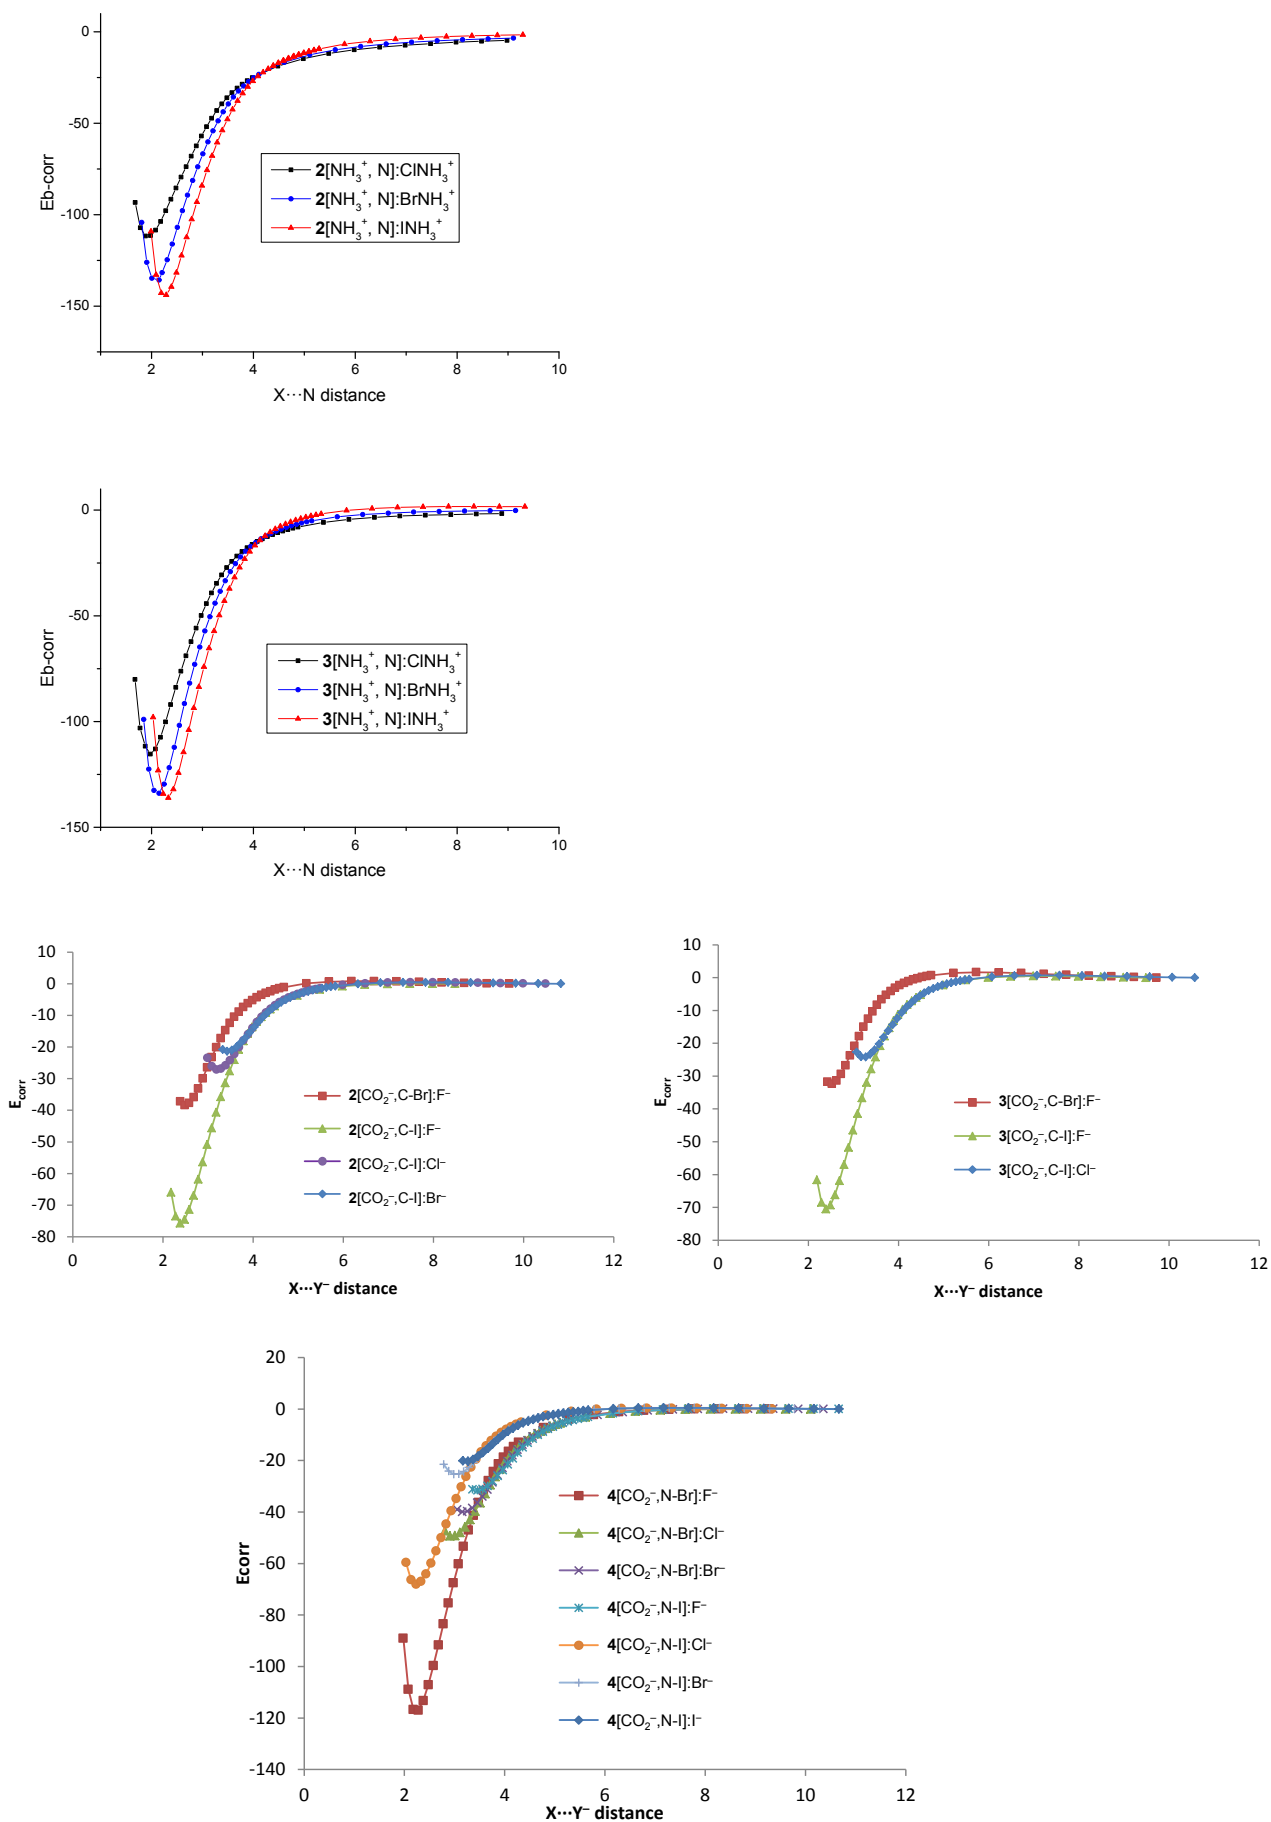

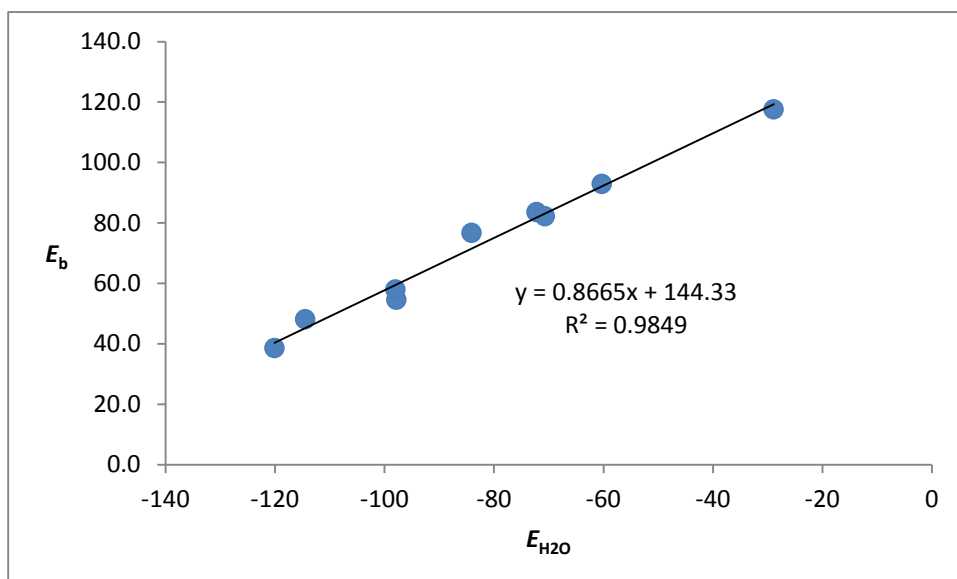

**Figure S4.** Representation of the binding energy in water ( $E_{H_2O}$ , kJ·mol<sup>-1</sup>) versus the binding energy in gas phase ( $E_b$ , kJ·mol<sup>-1</sup>) for the cation-cation complexes.

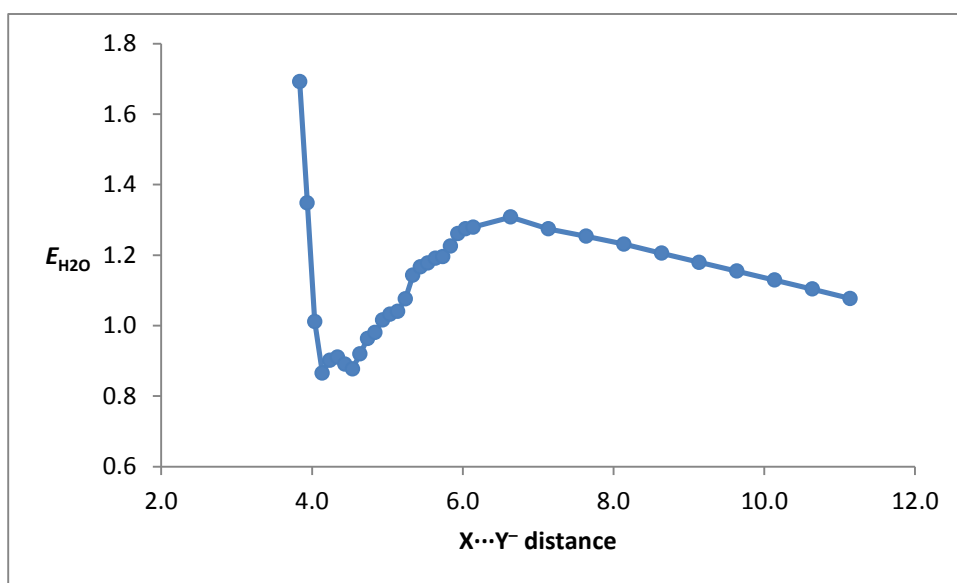

**Figure S5.** Binding energy along the dissociation path of  $3[CO_2^-, C-Br]:F^-$  in water.  $E_{H_2O}$  in kJ·mol<sup>-1</sup> and distances in Å.

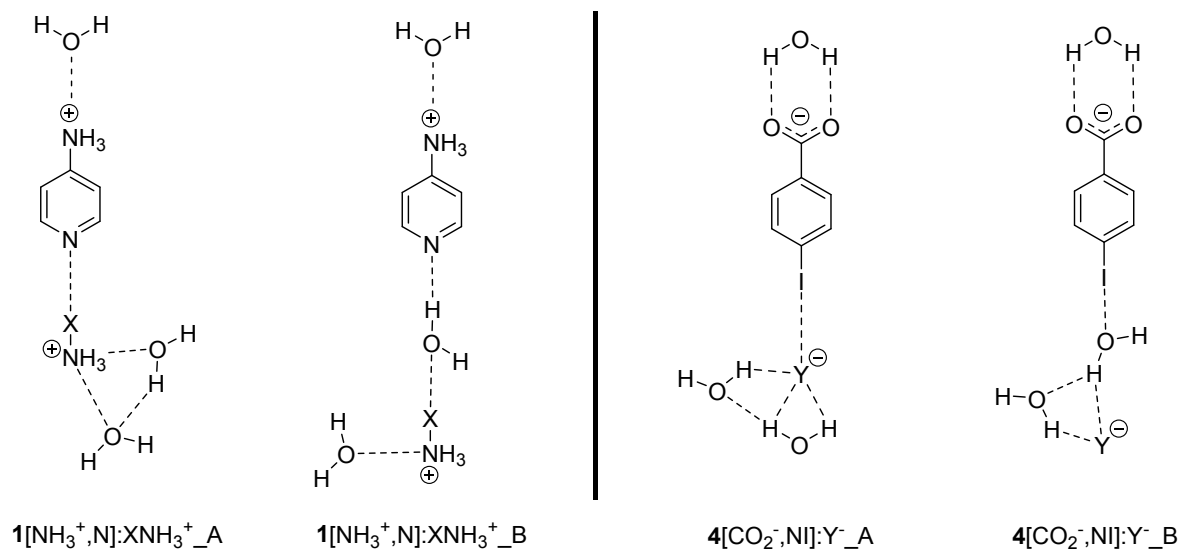

**Figure S6.** Schematic representation of the explicit solvent complexes under study.

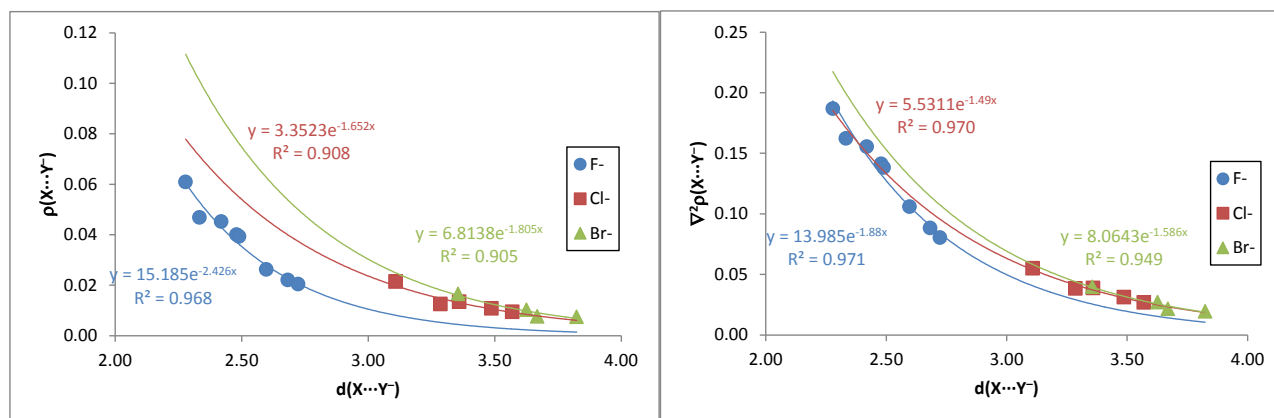

**Figure S7.** Exponential relationship between  $X...Y^-$  intermolecular distance and the electron density and laplacian at the BCP ( $\rho$  and  $\nabla^2\rho$ , respectively, in a.u.) for the anion-anion complexes in gas phase.

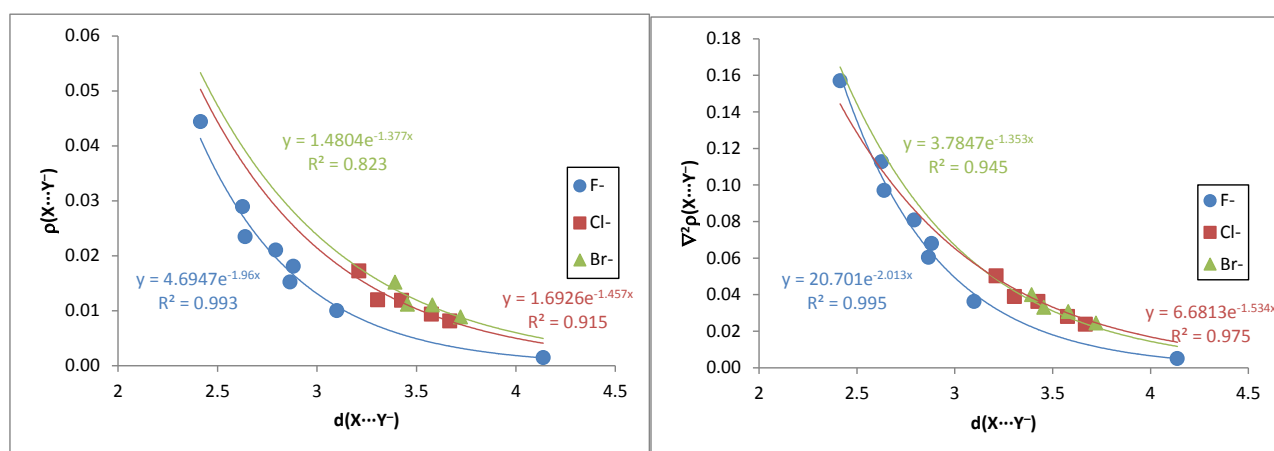

**Figure S8.** Exponential relationship between  $X...Y^-$  intermolecular distance and the electron density and laplacian at the BCP ( $\rho$  and  $\nabla^2\rho$ , respectively, in a.u.) for the anion-anion complexes in water.

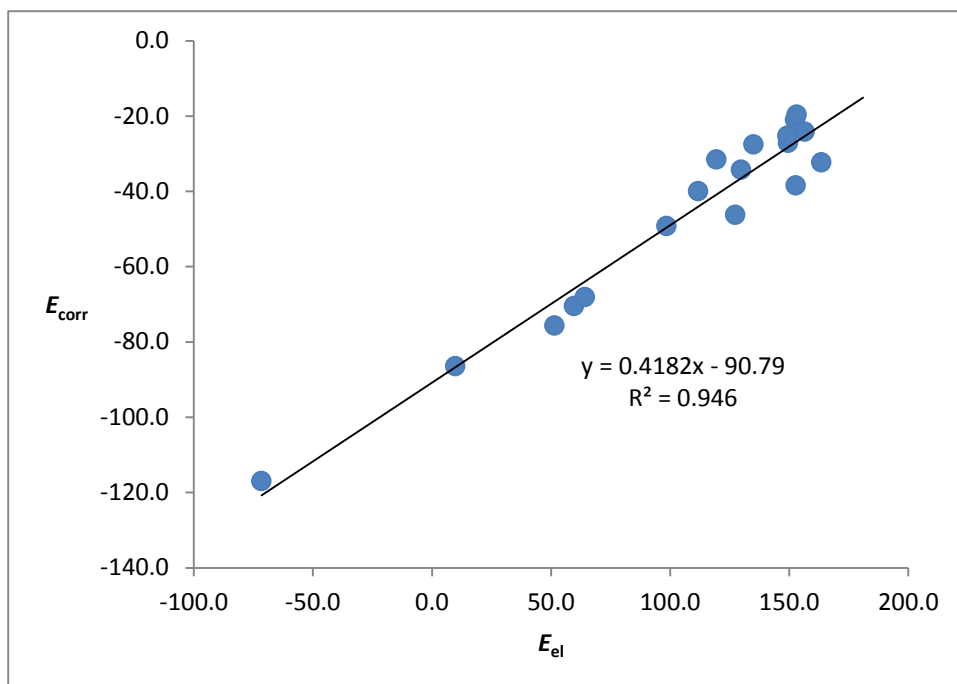

**Figure S9.** Corrected binding energy ( $E_{corr}$ ,  $\text{kJ}\cdot\text{mol}^{-1}$ ) vs the electrostatic contribution ( $E_{el}$ ,  $\text{kJ}\cdot\text{mol}^{-1}$ ) for anion-anion complexes in gas phase.

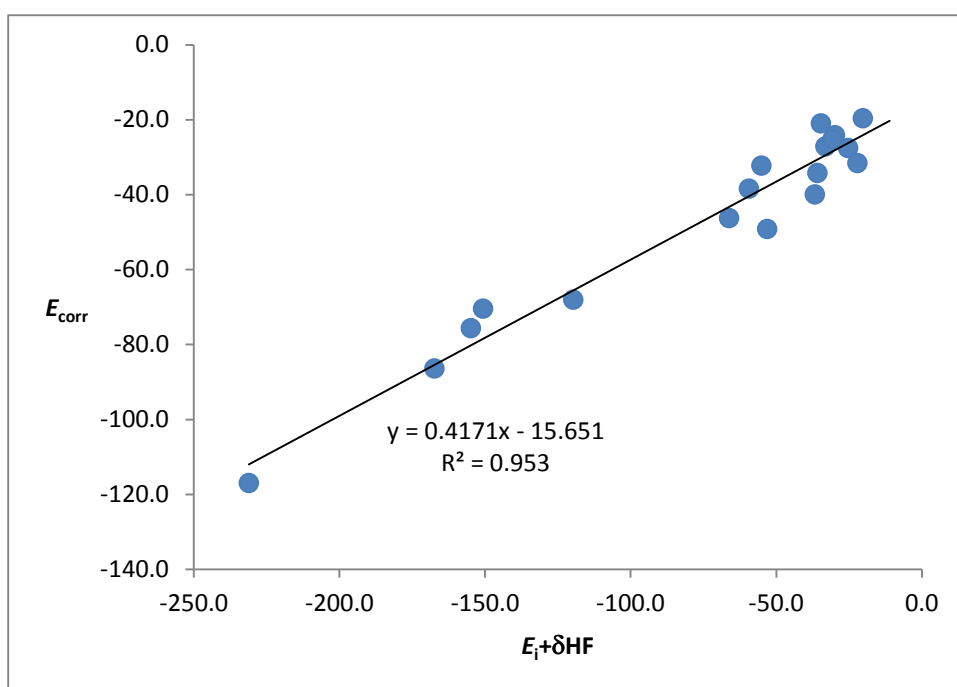

**Figure S10.** Corrected binding energy ( $E_{corr}$ ,  $\text{kJ}\cdot\text{mol}^{-1}$ ) vs the induction contribution ( $E_i + \delta\text{HF}$ ,  $\text{kJ}\cdot\text{mol}^{-1}$ ) for anion-anion complexes in gas phase.
